# Supplementary material for: Photocatalytic three-component radical cascade: a general route to heterocyclic-substituted alkyl sulfones
Source: Royal Society of Chemistry journal article supplement (doi:10.1039/d1qo00957e), 2021-01-01

## Photocatalytic three-component radical cascade: a general route to heterocyclic-substituted alkyl sulfones

Jian-Qiang Chen,<sup>a</sup> Nana Liu,<sup>a</sup> Qian Hu,<sup>a</sup> Jin Liu,<sup>a</sup> Junwei Wu,<sup>a</sup> Qinling Cai<sup>a</sup> and Jie Wu<sup>\*a,b,c</sup>

<sup>a</sup> Institute for Advanced Studies, Taizhou University, 1139 Shifu Avenue, Taizhou 318000, China

<sup>b</sup> State Key Laboratory of Organometallic Chemistry, Shanghai Institute of Organic Chemistry, Chinese Academy of Sciences, 345 Lingling Road, Shanghai 200032, China

<sup>c</sup> School of Chemistry and Chemical Engineering, Henan Normal University, 46 East Jianshe Road, Xinxiang 453007, China

### Supporting Information

1. General experimental method (S2)
2. General experimental procedure (S3-S4)
3. Radical trapping experiment (S5-S6)
4. Devices for the photocatalytic reactions (S7)
5. Characterization data of compounds (S8-S21)
6. <sup>1</sup>H NMR and <sup>13</sup>C NMR spectra of compounds (S22-S87)

**General experimental methods:**

Unless otherwise stated, all commercial reagents were used as received. All solvents were dried and distilled according to standard procedures. Flash column chromatography was performed using silica gel (60-Å pore size, 32-63µm, standard grade). Analytical thin-layer chromatography was performed using glass plates pre-coated with 0.25 mm 230-400 mesh silica gel impregnated with a fluorescent indicator (254 nm). Thin layer chromatography plates were visualized by exposure to ultraviolet light. Organic solutions were concentrated on rotary evaporators at ~20 Torr at 25-35 °C. Nuclear magnetic resonance (NMR) spectra are recorded in parts per million from internal tetramethylsilane on the  $\delta$  (ppm) scale.  $^1\text{H}$  NMR,  $^{19}\text{F}$  NMR and  $^{13}\text{C}$  NMR spectra were recorded in  $\text{CDCl}_3$  on a Bruker DRX - 400 spectrometer operating at 400 MHz, 376 MHz and 100 MHz respectively. All chemical shift values are quoted in ppm and coupling constants quoted in Hz. High resolution mass spectrometry (HRMS) spectra were obtained on a micrOTOF II Instrument.

General experimental procedure for the visible-light-induced sulfonylation of oxime **1**, DABSO and alkene **2**.

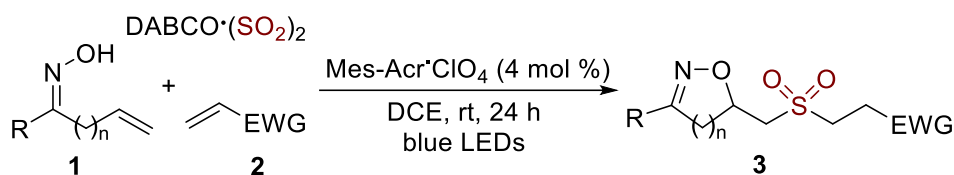

A dry tube was charged with oxime **1** (0.3 mmol), DABSO (0.2 mmol), alkene **2** (0.2 mmol) and Mes-Acr<sup>+</sup>ClO<sub>4</sub> (4.0 mol %), sealed with a rubber stopper, evacuated and backfilled with argon for four times before the addition of DCE (3.0 mL) *via* a syringe. The mixture was then placed around a blue LED (24 W) with a distance of 10 centimeters, and was stirred under blue light irradiation for 24 hours at room temperature. After completion of reaction as indicated by TLC, the solvent was evaporated in vacuo, and purified by flash column chromatography (EtOAc/*n*-hexane, 1:3) to provide the desired product **3**.

General experimental procedure for the aminosulfonylation of  $\beta,\gamma$ -unsaturated hydrazones **4** with DABSO and alkene **2**.

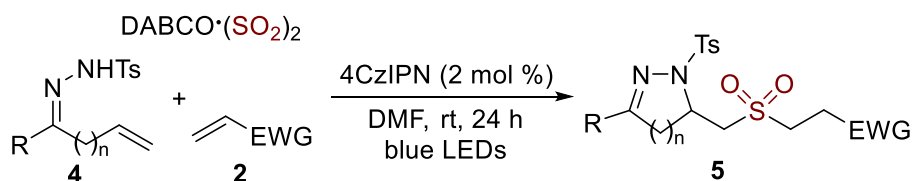

A dry tube was charged with  $\beta,\gamma$ -unsaturated hydrazones **4** (0.2 mmol), DABSO (0.2 mmol), alkene **2** (0.3 mmol) and 4CzIPN (2.0 mol %), sealed with a rubber stopper, evacuated and backfilled with argon for four times before the addition of DMF (3.0 mL) *via* a syringe. The mixture was then placed around a blue LED (24 W) with a distance of 10 centimeters, and was stirred under blue light irradiation for 24 hours at room temperature. After completion of reaction as indicated by TLC, the solvent was evaporated in *vacuo*, and purified by flash column chromatography (EtOAc/*n*-hexane, 1:2) to provide the desired product **5**.

### Radical trapping experiment

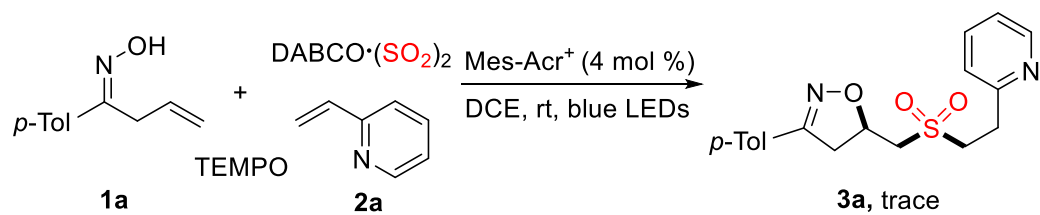

A dry tube was charged with (*E*)-1-(*p*-tolyl)but-3-en-1-one oxime **1a** (0.3 mmol), DABSO (0.2 mmol), 2-vinylpyridine **2a** (0.2 mmol), Mes-Acr<sup>+</sup> (4.0 mol %) and TEMPO (0.4 mmol), sealed with a rubber stopper, evacuated and backfilled with argon for four times before the addition of DCE (3.0 mL) *via* a syringe. The mixture was then placed around a blue LED (24 W) with a distance of 10 centimeters, and was stirred under blue light irradiation for 24 hours at room temperature. After completion of reaction as indicated by TLC, only a trace of the desired product **3a** was detected.

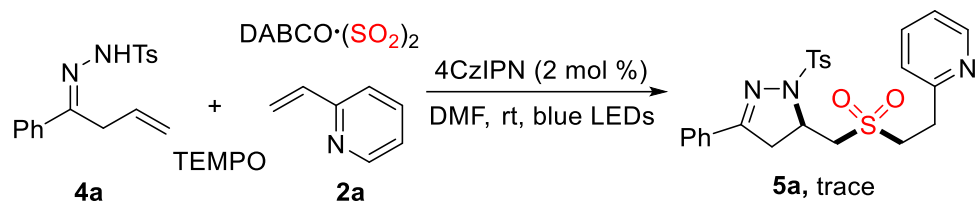

A dry tube was charged with (E)-4-methyl-N'-(1-phenylbut-3-en-1-ylidene)benzenesulfonohydrazide **4a** (0.2 mmol), DABSO (0.2 mmol), 2-vinylpyridine **2a** (0.3 mmol), 4CzIPN (2.0 mol %) and TEMPO (0.4 mmol), sealed with a rubber stopper, evacuated and backfilled with argon for four times before the addition of DMF (3.0 mL) *via* a syringe. The mixture was then placed around a blue LED (24 W) with a distance of 10 centimeters, and was stirred under blue light irradiation for 24 hours at room temperature. After completion of reaction as indicated by TLC, only a trace of the desired product **5a** was detected.

*Devices for the photocatalytic reactions*

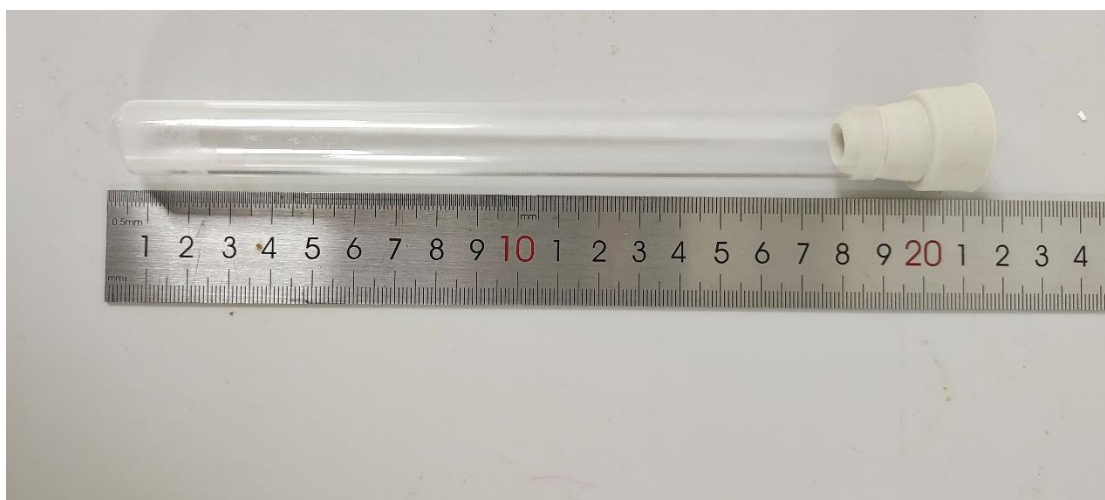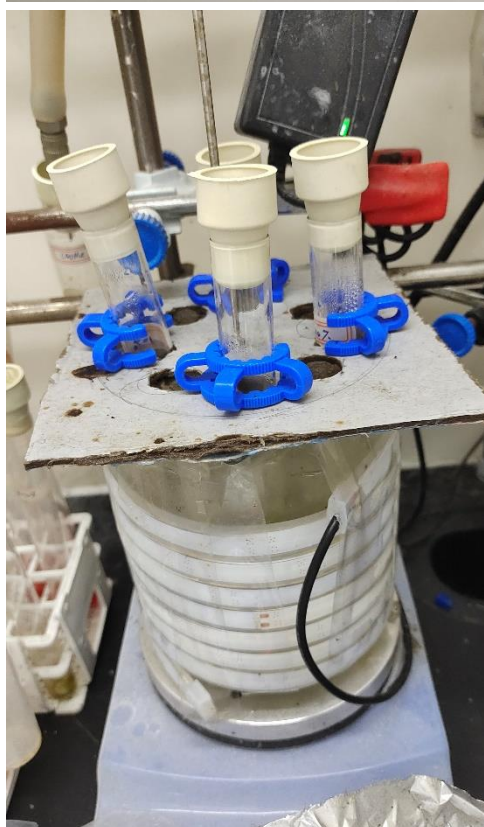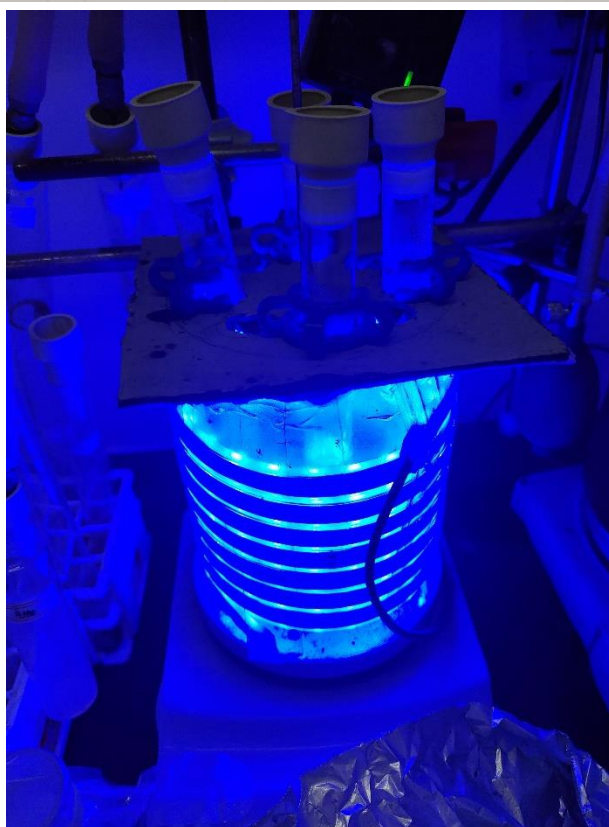

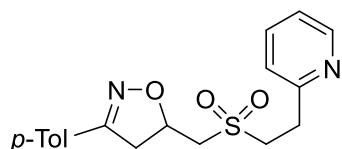

5-(((2-(Pyridin-2-yl)ethyl)sulfonyl)methyl)-3-(*p*-tolyl)-4,5-dihydroisoxazole (**3a**)

$^1\text{H}$  NMR (400 MHz,  $\text{CDCl}_3$ )  $\delta$  (ppm) 8.53 (d,  $J = 4.3$  Hz, 1H), 7.63 (td,  $J = 7.7, 1.8$  Hz, 1H), 7.54 (d,  $J = 8.2$  Hz, 2H), 7.25 (d,  $J = 7.9$  Hz, 1H), 7.22 (d,  $J = 8.0$  Hz, 2H), 7.17 (dd,  $J = 7.2, 5.1$  Hz, 1H), 5.25 (dq,  $J = 10.5, 6.8$  Hz, 1H), 3.70 (td,  $J = 7.1, 2.0$  Hz, 2H), 3.62 (dd,  $J = 17.0, 10.4$  Hz, 1H), 3.49 (dd,  $J = 14.4, 6.9$  Hz, 1H), 3.38 – 3.27 (m, 3H), 3.14 (dd,  $J = 14.4, 5.7$  Hz, 1H), 2.38 (s, 3H);  $^{13}\text{C}$  NMR (101 MHz,  $\text{CDCl}_3$ )  $\delta$  (ppm) 157.0, 156.9, 149.5, 141.0, 136.8, 129.5, 126.7, 125.7, 123.3, 122.0, 74.6, 57.3, 53.6, 40.5, 29.9, 21.4; HRMS calcd for  $\text{C}_{18}\text{H}_{20}\text{N}_2\text{NaO}_3\text{S}^+$  ( $\text{M}+\text{Na}^+$ ): 367.1087, found: 367.1095.

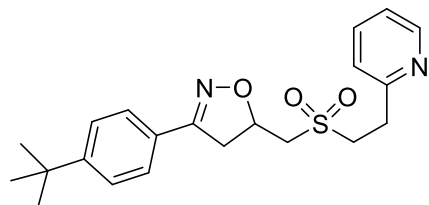

3-(4-(*tert*-Butyl)phenyl)-5-(((2-(pyridin-2-yl)ethyl)sulfonyl)methyl)-4,5-dihydroisoxazole (**3b**)

$^1\text{H}$  NMR (400 MHz,  $\text{CDCl}_3$ )  $\delta$  (ppm) 8.53 (d,  $J = 4.2$  Hz, 1H), 7.66 – 7.58 (m, 3H), 7.44 (d,  $J = 8.4$  Hz, 2H), 7.25 (d,  $J = 7.8$  Hz, 1H), 7.19 – 7.15 (m, 1H), 5.30 – 5.21 (m, 1H), 3.72 – 3.59 (m, 3H), 3.49 (dd,  $J = 14.4, 6.9$  Hz, 1H), 3.39 – 3.29 (m, 3H), 3.14 (dd,  $J = 14.4, 5.7$  Hz, 1H), 1.33 (s, 9H);  $^{13}\text{C}$  NMR (101 MHz,  $\text{CDCl}_3$ )  $\delta$  (ppm) 157.0, 156.8, 154.1, 149.5, 136.8, 126.6, 125.8, 125.7, 123.3, 122.0, 74.6, 57.3, 53.6, 40.5, 34.9, 31.1, 29.9; HRMS calcd for  $\text{C}_{21}\text{H}_{26}\text{N}_2\text{NaO}_3\text{S}^+$  ( $\text{M}+\text{Na}^+$ ): 409.1556, found: 409.1563.

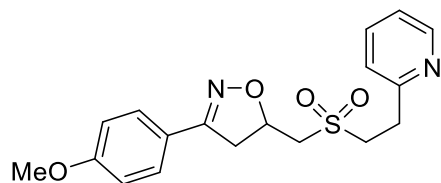

3-(4-Methoxyphenyl)-5-(((2-(pyridin-2-yl)ethyl)sulfonyl)methyl)-4,5-dihydroisoxazole (**3c**)

$^1\text{H}$  NMR (400 MHz,  $\text{CDCl}_3$ )  $\delta$  (ppm) 8.53 (d,  $J = 4.4$  Hz, 1H), 7.66 – 7.61 (m, 1H), 7.59 (d,  $J = 8.8$  Hz, 2H), 7.25 (d,  $J = 7.8$  Hz, 1H), 7.16 (dd,  $J = 7.2, 5.1$  Hz, 1H), 6.92 (d,  $J = 8.8$  Hz,



2H), 5.23 (dq,  $J = 10.5, 6.7$  Hz, 1H), 3.84 (s, 3H), 3.72 – 3.67 (m, 2H), 3.60 (dd,  $J = 16.9, 10.4$  Hz, 1H), 3.49 (dd,  $J = 14.4, 6.9$  Hz, 1H), 3.37 – 3.26 (m, 3H), 3.14 (dd,  $J = 14.4, 5.7$  Hz, 1H);  $^{13}\text{C}$  NMR (101 MHz,  $\text{CDCl}_3$ )  $\delta$  (ppm) 161.4, 157.0, 156.5, 149.5, 136.7, 128.4, 123.3, 122.0, 121.0, 114.2, 74.5, 57.2, 55.3, 53.6, 40.6, 29.9; HRMS calcd for  $\text{C}_{18}\text{H}_{20}\text{N}_2\text{NaO}_4\text{S}^+$  ( $\text{M}+\text{Na}^+$ ): 383.1036, found: 383.1041.

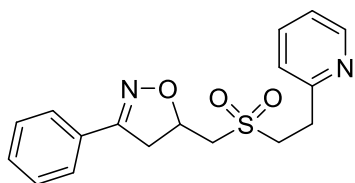

3-Phenyl-5-(((2-(pyridin-2-yl)ethyl)sulfonyl)methyl)-4,5-dihydroisoxazole (**3d**)

$^1\text{H}$  NMR (400 MHz,  $\text{CDCl}_3$ )  $\delta$  (ppm) 8.53 (d,  $J = 4.3$  Hz, 1H), 7.68 – 7.61 (m, 3H), 7.42 (q,  $J = 5.2$  Hz, 3H), 7.25 (d,  $J = 8.5$  Hz, 1H), 7.17 (dd,  $J = 6.9, 5.3$  Hz, 1H), 5.28 (dq,  $J = 12.9, 6.6$  Hz, 1H), 3.75 – 3.61 (m, 3H), 3.50 (dd,  $J = 14.4, 6.8$  Hz, 1H), 3.40 – 3.30 (m, 3H), 3.16 (dd,  $J = 14.4, 5.8$  Hz, 1H);  $^{13}\text{C}$  NMR (101 MHz,  $\text{CDCl}_3$ )  $\delta$  (ppm) 156.9, 149.5, 136.8, 130.6, 128.8, 128.6, 126.8, 123.4, 122.1, 74.8, 57.3, 53.6, 40.4, 29.9; HRMS calcd for  $\text{C}_{17}\text{H}_{18}\text{N}_2\text{NaO}_3\text{S}^+$  ( $\text{M}+\text{Na}^+$ ): 353.0930, found: 353.0935.

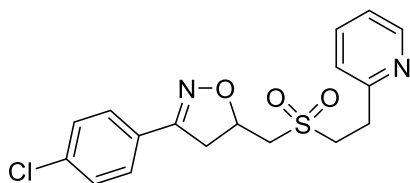

3-(4-Chlorophenyl)-5-(((2-(pyridin-2-yl)ethyl)sulfonyl)methyl)-4,5-dihydroisoxazole (**3e**)

$^1\text{H}$  NMR (400 MHz,  $\text{CDCl}_3$ )  $\delta$  (ppm) 8.54 (d,  $J = 4.3$  Hz, 1H), 7.64 (td,  $J = 7.7, 1.8$  Hz, 1H), 7.59 (d,  $J = 8.6$  Hz, 2H), 7.39 (d,  $J = 8.6$  Hz, 2H), 7.25 (d,  $J = 7.9$  Hz, 1H), 7.18 (dd,  $J = 7.0, 5.2$  Hz, 1H), 5.28 (dq,  $J = 10.6, 6.6$  Hz, 1H), 3.70 (td,  $J = 7.3, 3.4$  Hz, 2H), 3.61 (dd,  $J = 17.0, 10.5$  Hz, 1H), 3.49 (dd,  $J = 14.4, 6.5$  Hz, 1H), 3.39 – 3.30 (m, 3H), 3.16 (dd,  $J = 14.4, 6.2$  Hz, 1H);  $^{13}\text{C}$  NMR (101 MHz,  $\text{CDCl}_3$ )  $\delta$  (ppm) 156.9, 156.1, 149.5, 136.8, 136.6, 129.1, 128.0, 127.1, 123.4, 122.1, 75.0, 57.1, 53.6, 40.2, 29.9; HRMS calcd for  $\text{C}_{17}\text{H}_{17}\text{ClN}_2\text{NaO}_3\text{S}^+$  ( $\text{M}+\text{Na}^+$ ): 387.0541, found: 387.0548.

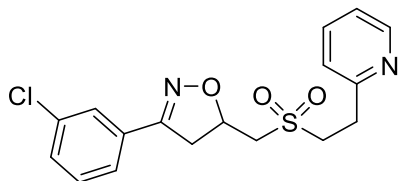

3-(3-Chlorophenyl)-5-(((2-(pyridin-2-yl)ethyl)sulfonyl)methyl)-4,5-dihydroisoxazole  
(3f)

$^1\text{H}$  NMR (400 MHz,  $\text{CDCl}_3$ )  $\delta$  (ppm) 8.54 (d,  $J = 4.1$  Hz, 1H), 7.64 (ddd,  $J = 9.5, 5.6, 1.8$  Hz, 2H), 7.55 – 7.52 (m, 1H), 7.43 – 7.33 (m, 2H), 7.25 (d,  $J = 7.8$  Hz, 1H), 7.17 (dd,  $J = 7.0, 5.2$  Hz, 1H), 5.29 (dq,  $J = 10.6, 6.6$  Hz, 1H), 3.73 – 3.58 (m, 3H), 3.49 (dd,  $J = 14.4, 6.6$  Hz, 1H), 3.38 – 3.30 (m, 3H), 3.17 (dd,  $J = 14.4, 6.1$  Hz, 1H);  $^{13}\text{C}$  NMR (101 MHz,  $\text{CDCl}_3$ )  $\delta$  (ppm) 156.9, 156.0, 149.5, 136.8, 134.9, 130.5, 130.3, 130.1, 126.8, 124.9, 123.3, 122.1, 75.1, 57.1, 53.6, 40.1, 29.9; HRMS calcd for  $\text{C}_{17}\text{H}_{17}\text{ClN}_2\text{NaO}_3\text{S}^+$  ( $\text{M}+\text{Na}^+$ ): 387.0541, found: 387.0551.

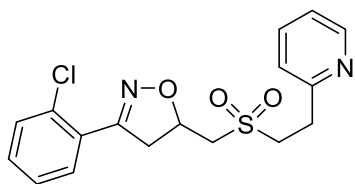

3-(2-Chlorophenyl)-5-(((2-(pyridin-2-yl)ethyl)sulfonyl)methyl)-4,5-dihydroisoxazole  
(3g)

$^1\text{H}$  NMR (400 MHz,  $\text{CDCl}_3$ )  $\delta$  (ppm) 8.54 (s, 1H), 7.68 – 7.62 (m, 2H), 7.53 (d,  $J = 7.6$  Hz, 1H), 7.38 (dt,  $J = 15.6, 4.8$  Hz, 2H), 7.19 (s, 2H), 5.33 – 5.25 (m, 1H), 3.74 – 3.57 (m, 3H), 3.50 (dd,  $J = 14.4, 6.6$  Hz, 1H), 3.39 – 3.29 (m, 3H), 3.18 (dd,  $J = 14.4, 6.0$  Hz, 1H);  $^{13}\text{C}$  NMR (101 MHz,  $\text{CDCl}_3$ )  $\delta$  (ppm) 156.8, 156.0, 149.4, 136.9, 134.8, 130.5, 130.3, 130.1, 126.8, 124.9, 123.4, 122.1, 75.1, 57.1, 53.6, 40.1, 29.9; HRMS calcd for  $\text{C}_{17}\text{H}_{17}\text{ClN}_2\text{NaO}_3\text{S}^+$  ( $\text{M}+\text{Na}^+$ ): 387.0541, found: 387.0548.

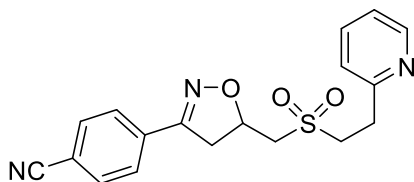

4-(5-(((2-(pyridin-2-yl)ethyl)sulfonyl)methyl)-4,5-dihydroisoxazol-3-yl)benzonitrile  
(3h)

$^1\text{H}$  NMR (400 MHz,  $\text{CDCl}_3$ )  $\delta$  (ppm) 8.54 (d,  $J = 4.3$  Hz, 1H), 7.77 (d,  $J = 8.5$  Hz, 2H),

7.71 (d,  $J = 8.5$  Hz, 2H), 7.65 (td,  $J = 7.7, 1.7$  Hz, 1H), 7.25 (d,  $J = 7.8$  Hz, 1H), 7.19 (dd,  $J = 6.9, 5.3$  Hz, 1H), 5.38 – 5.30 (m, 1H), 3.74 – 3.61 (m, 3H), 3.51 (dd,  $J = 14.3, 6.2$  Hz, 1H), 3.42 – 3.34 (m, 3H), 3.20 (dd,  $J = 14.3, 6.5$  Hz, 1H);  $^{13}\text{C}$  NMR (101 MHz,  $\text{CDCl}_3$ )  $\delta$  (ppm) 156.7, 155.8, 149.5, 136.8, 132.9, 132.6, 127.3, 123.4, 122.2, 118.1, 113.9, 75.6, 56.9, 53.6, 39.7, 29.9; HRMS calcd for  $\text{C}_{18}\text{H}_{17}\text{N}_3\text{NaO}_3\text{S}^+$  ( $\text{M}+\text{Na}^+$ ): 378.0883, found: 378.0890.

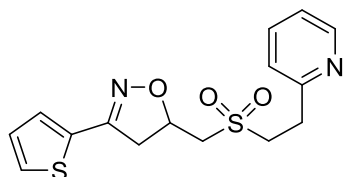

5-(((2-(Pyridin-2-yl)ethyl)sulfonyl)methyl)-3-(thiophen-2-yl)-4,5-dihydroisoxazole (**3i**)  
 $^1\text{H}$  NMR (400 MHz,  $\text{CDCl}_3$ )  $\delta$  (ppm) 8.53 (d,  $J = 4.2$  Hz, 1H), 7.64 (td,  $J = 7.7, 1.6$  Hz, 1H), 7.43 (d,  $J = 4.5$  Hz, 1H), 7.24 (t,  $J = 5.5$  Hz, 2H), 7.17 (dd,  $J = 7.1, 5.2$  Hz, 1H), 7.08 (dd,  $J = 4.9, 3.8$  Hz, 1H), 5.30 – 5.22 (m, 1H), 3.72 – 3.61 (m, 3H), 3.50 (dd,  $J = 14.4, 6.9$  Hz, 1H), 3.37 – 3.31 (m, 3H), 3.16 (dd,  $J = 14.4, 5.7$  Hz, 1H);  $^{13}\text{C}$  NMR (101 MHz,  $\text{CDCl}_3$ )  $\delta$  (ppm) 156.9, 152.7, 149.4, 136.8, 130.8, 129.2, 128.9, 127.5, 123.3, 122.1, 75.0, 57.0, 53.6, 41.1, 29.8; HRMS calcd for  $\text{C}_{15}\text{H}_{16}\text{N}_2\text{NaO}_3\text{S}_2^+$  ( $\text{M}+\text{Na}^+$ ): 359.0495, found: 359.0495.

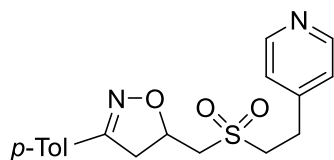

5-(((2-(Pyridin-4-yl)ethyl)sulfonyl)methyl)-3-(*p*-tolyl)-4,5-dihydroisoxazole (**3j**)  
 $^1\text{H}$  NMR (400 MHz,  $\text{CDCl}_3$ )  $\delta$  (ppm) 8.56 (dd,  $J = 4.4, 1.4$  Hz, 2H), 7.55 (d,  $J = 8.1$  Hz, 2H), 7.23 (d,  $J = 7.2$  Hz, 4H), 5.31 – 5.23 (m, 1H), 3.65 (dd,  $J = 16.9, 10.5$  Hz, 1H), 3.55 – 3.42 (m, 3H), 3.27 – 3.12 (m, 4H), 2.39 (s, 3H);  $^{13}\text{C}$  NMR (101 MHz,  $\text{CDCl}_3$ )  $\delta$  (ppm) 157.0, 150.2, 146.5, 141.3, 129.6, 126.8, 125.4, 123.8, 74.8, 57.6, 54.7, 40.6, 27.3, 21.5; HRMS calcd for  $\text{C}_{18}\text{H}_{20}\text{N}_2\text{NaO}_3\text{S}^+$  ( $\text{M}+\text{Na}^+$ ): 367.1087, found: 367.1095.

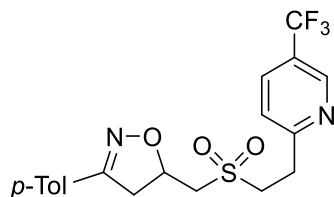

3-(*p*-Tolyl)-5-(((2-(5-(trifluoromethyl)pyridin-2-yl)ethyl)sulfonyl)methyl)-4,5-dihydroisoxazole (**3k**)

$^1\text{H}$  NMR (400 MHz,  $\text{CDCl}_3$ )  $\delta$  (ppm) 8.80 (s, 1H), 7.88 (dd,  $J = 8.1, 1.8$  Hz, 1H), 7.55 (d,  $J = 8.1$  Hz, 2H), 7.40 (d,  $J = 8.1$  Hz, 1H), 7.23 (d,  $J = 8.0$  Hz, 2H), 5.31 – 5.23 (m, 1H), 3.77 – 3.72 (m, 2H), 3.64 (dd,  $J = 16.9, 10.5$  Hz, 1H), 3.54 (dd,  $J = 14.6, 7.6$  Hz, 1H), 3.46 – 3.42 (m, 2H), 3.29 (dd,  $J = 16.9, 6.8$  Hz, 1H), 3.19 (dd,  $J = 14.6, 4.7$  Hz, 1H), 2.39 (s, 3H);  $^{13}\text{C}$  NMR (101 MHz,  $\text{CDCl}_3$ )  $\delta$  (ppm) 161.1, 156.9, 146.4 (q,  $J = 4.0$  Hz), 141.1, 133.8 (q,  $J = 3.3$  Hz), 129.6, 126.8, 125.6, 123.5 (q,  $J = 272.4$  Hz), 123.1, 74.7, 57.6, 53.1, 40.6, 29.8, 21.5; HRMS calcd for  $\text{C}_{19}\text{H}_{19}\text{F}_3\text{N}_2\text{NaO}_3\text{S}^+$  ( $\text{M}+\text{Na}^+$ ): 435.0961, found: 435.0970.

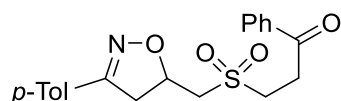

1-Phenyl-3-(((3-(*p*-tolyl)-4,5-dihydroisoxazol-5-yl)methyl)sulfonyl)propan-1-one (**3l**)

$^1\text{H}$  NMR (400 MHz, DMSO)  $\delta$  (ppm) 8.03 (dd,  $J = 8.3, 1.1$  Hz, 2H), 7.70 – 7.65 (m, 1H), 7.58 – 7.53 (m, 4H), 7.28 (d,  $J = 8.0$  Hz, 2H), 5.18 – 5.10 (m, 1H), 3.86 (dd,  $J = 14.7, 7.6$  Hz, 1H), 3.68 (dd,  $J = 17.1, 10.6$  Hz, 1H), 3.61 – 3.54 (m, 4H), 3.37 – 3.28 (m, 1H), 2.51 (dt,  $J = 3.5, 1.7$  Hz, 1H), 2.35 (s, 3H);  $^{13}\text{C}$  NMR (101 MHz, DMSO)  $\delta$  (ppm) 196.7, 157.4, 140.6, 136.4, 134.0, 129.8, 129.2, 128.5, 127.1, 126.6, 75.2, 56.6, 48.0 (dt,  $J = 42.4, 21.1$  Hz), 31.4, 21.4; HRMS calcd for  $\text{C}_{20}\text{H}_{21}\text{NNaO}_4\text{S}^+$  ( $\text{M}+\text{Na}^+$ ): 394.1083, found: 394.1089.

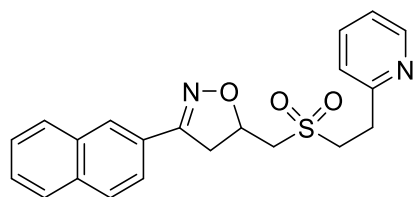

3-(naphthalen-2-yl)-5-(((2-(pyridin-2-yl)ethyl)sulfonyl)methyl)-4,5-dihydroisoxazole (**3m**)

$^1\text{H}$  NMR (400 MHz,  $\text{CDCl}_3$ )  $\delta$  (ppm) 8.53 (d,  $J = 4.1$  Hz, 1H), 7.94 – 7.89 (m, 2H), 7.86 – 7.83 (m, 3H), 7.63 (td,  $J = 7.7, 1.8$  Hz, 1H), 7.56 – 7.50 (m, 2H), 7.25 (d,  $J = 7.8$  Hz, 1H), 7.16 (dd,  $J = 7.1, 5.3$  Hz, 1H), 5.31 (dq,  $J = 10.5, 6.4$  Hz, 1H), 3.77 – 3.68 (m, 3H), 3.53 (dd,  $J = 14.4, 6.7$  Hz, 1H), 3.45 (dd,  $J = 16.9, 7.0$  Hz, 1H), 3.37 (t,  $J = 7.8$  Hz, 2H), 3.19 (dd,  $J = 14.4, 6.0$  Hz, 1H);  $^{13}\text{C}$  NMR (101 MHz,  $\text{CDCl}_3$ )  $\delta$  (ppm) 157.1, 157.0, 149.5,

136.8, 134.2, 132.9, 128.7, 128.4, 127.8, 127.4, 126.8, 126.1, 123.3, 123.3, 122.1, 74.9, 57.3, 53.7, 40.4, 29.9; HRMS calcd for  $C_{21}H_{20}N_2NaO_3S^+$  ( $M+Na^+$ ): 403.1087, found: 403.1095.

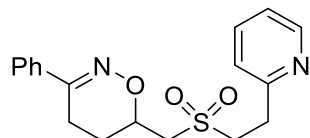

3-Phenyl-6-(((2-(pyridin-2-yl)ethyl)sulfonyl)methyl)-5,6-dihydro-4H-1,2-oxazine (**3n**)

$^1H$  NMR (400 MHz,  $CDCl_3$ )  $\delta$  (ppm) 8.54 (d,  $J = 4.1$  Hz, 1H), 7.81 (d,  $J = 7.1$  Hz, 2H), 7.62 (td,  $J = 7.7, 1.8$  Hz, 1H), 7.46 – 7.42 (m, 1H), 7.39 – 7.35 (m, 2H), 7.22 (d,  $J = 7.8$  Hz, 1H), 7.17 (dd,  $J = 7.1, 5.3$  Hz, 1H), 4.76 – 4.67 (m, 1H), 3.98 – 3.90 (m, 1H), 3.85 – 3.77 (m, 1H), 3.47 – 3.34 (m, 3H), 3.18 – 3.06 (m, 2H), 2.99 – 2.89 (m, 1H), 2.51 – 2.40 (m, 1H), 1.85 – 1.75 (m, 1H);  $^{13}C$  NMR (101 MHz,  $CDCl_3$ )  $\delta$  (ppm) 174.2, 157.7, 149.5, 136.6, 133.7, 130.9, 128.5, 127.9, 123.3, 121.9, 67.4, 58.8, 53.5, 35.1, 30.4, 29.1; HRMS calcd for  $C_{18}H_{20}N_2NaO_3S^+$  ( $M+Na^+$ ): 367.1087, found: 367.1094.

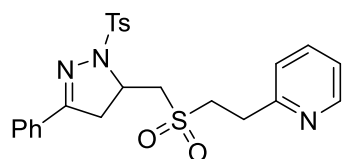

2-(2-(((3-Phenyl-1-tosyl-4,5-dihydro-1H-pyrazol-5-yl)methyl)sulfonyl)ethyl)pyridine (**5a**)

$^1H$  NMR (400 MHz,  $CDCl_3$ )  $\delta$  (ppm) 8.56 (s, 1H), 7.80 (d,  $J = 7.5$  Hz, 2H), 7.64 (d,  $J = 6.9$  Hz, 3H), 7.42 – 7.18 (m, 7H), 4.18 (d,  $J = 11.9$  Hz, 2H), 3.73 – 3.63 (m, 2H), 3.41 (t,  $J = 9.8$  Hz, 4H), 3.29 – 3.22 (m, 1H), 2.37 (s, 3H);  $^{13}C$  NMR (101 MHz,  $CDCl_3$ )  $\delta$  (ppm) 158.3, 156.6, 149.4, 144.8, 136.7, 130.8, 130.4, 123.0, 129.6, 128.8, 128.5, 126.8, 123.3, 122.0, 57.4, 56.0, 53.3, 39.8, 29.9, 21.5; HRMS calcd for  $C_{24}H_{25}N_3NaO_4S_2^+$  ( $M+Na^+$ ): 506.1179, found: 506.1188.

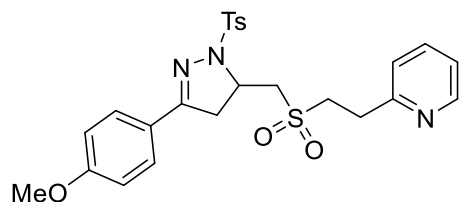

2-(2-(((3-(4-Methoxyphenyl)-1-tosyl-4,5-dihydro-1H-pyrazol-5-yl)methyl)sulfonyl)ethyl)pyridine (**5b**)

$^1\text{H}$  NMR (400 MHz,  $\text{CDCl}_3$ )  $\delta$  (ppm) 8.57 (d,  $J = 4.1$  Hz, 1H), 7.80 (d,  $J = 8.3$  Hz, 2H), 7.66 (td,  $J = 7.7, 1.8$  Hz, 1H), 7.61 – 7.58 (m, 2H), 7.29 (d,  $J = 8.2$  Hz, 3H), 7.20 (dd,  $J = 7.1, 5.2$  Hz, 1H), 6.87 (d,  $J = 8.9$  Hz, 2H), 4.20 – 4.10 (m, 2H), 3.82 (s, 3H), 3.68 (dd,  $J = 9.0, 6.6$  Hz, 2H), 3.43 – 3.33 (m, 4H), 3.21 (dd,  $J = 17.6, 10.2$  Hz, 1H), 2.38 (s, 3H);  $^{13}\text{C}$  NMR (101 MHz,  $\text{CDCl}_3$ )  $\delta$  (ppm) 161.7, 158.1, 156.7, 149.5, 144.8, 136.8, 130.4, 129.7, 128.9, 128.6, 123.4, 122.6, 122.1, 114.0, 57.6, 55.9, 55.3, 53.4, 40.0, 30.0, 21.6; HRMS calcd for  $\text{C}_{25}\text{H}_{27}\text{N}_3\text{NaO}_5\text{S}_2^+$  ( $\text{M}+\text{Na}^+$ ): 536.1284, found: 536.1293.

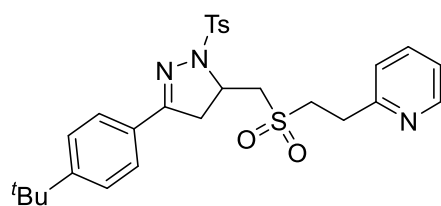

2-(2-(((3-(4-(*tert*-Butyl)phenyl)-1-tosyl-4,5-dihydro-1*H*-pyrazol-5-yl)methyl)sulfonyl)ethyl)pyridine (**5c**)

$^1\text{H}$  NMR (400 MHz,  $\text{CDCl}_3$ )  $\delta$  (ppm) 8.58 (d,  $J = 4.4$  Hz, 1H), 7.80 (d,  $J = 8.3$  Hz, 2H), 7.67 (td,  $J = 7.7, 1.8$  Hz, 1H), 7.60 (d,  $J = 8.5$  Hz, 2H), 7.40 (d,  $J = 8.5$  Hz, 2H), 7.29 (d,  $J = 8.3$  Hz, 3H), 7.21 (dd,  $J = 7.2, 5.1$  Hz, 1H), 4.20 – 4.11 (m, 2H), 3.70 (d,  $J = 7.3$  Hz, 1H), 3.67 (d,  $J = 5.8$  Hz, 1H), 3.45 – 3.31 (m, 4H), 3.23 (dd,  $J = 17.7, 10.2$  Hz, 1H), 2.39 (s, 3H), 1.32 (s, 9H);  $^{13}\text{C}$  NMR (101 MHz,  $\text{CDCl}_3$ )  $\delta$  (ppm) 158.3, 156.7, 154.5, 149.6, 144.9, 136.9, 130.5, 129.8, 128.9, 127.3, 126.9, 125.7, 123.4, 122.2, 57.8, 56.0, 53.5, 40.0, 34.9, 31.1, 30.1, 21.6; HRMS calcd for  $\text{C}_{28}\text{H}_{33}\text{N}_3\text{NaO}_4\text{S}_2^+$  ( $\text{M}+\text{Na}^+$ ): 540.1985, found: 540.1995.

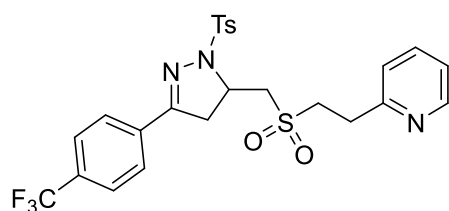

2-(2-(((1-tosyl-3-(4-(Trifluoromethyl)phenyl)-4,5-dihydro-1*H*-pyrazol-5-yl)methyl)sulfonyl)ethyl)pyridine (**5d**)

$^1\text{H}$  NMR (400 MHz,  $\text{CDCl}_3$ )  $\delta$  (ppm) 8.57 (d,  $J = 4.1$  Hz, 1H), 7.78 (dd,  $J = 13.5, 8.2$  Hz, 4H), 7.70 – 7.61 (m, 3H), 7.30 (dd,  $J = 11.9, 9.0$  Hz, 3H), 7.21 (dd,  $J = 7.0, 5.2$  Hz, 1H), 4.30 – 4.16 (m, 2H), 3.70 (dd,  $J = 8.8, 6.7$  Hz, 2H), 3.50 – 3.36 (m, 4H), 3.28 (dd,  $J =$

17.6, 10.3 Hz, 1H), 2.40 (s, 3H);  $^{13}\text{C}$  NMR (101 MHz,  $\text{CDCl}_3$ )  $\delta$  (ppm) 156.8 (d,  $J = 35.1$  Hz), 149.5, 145.2, 136.9, 133.4, 132.4 (q,  $J = 32.8$  Hz), 130.5, 129.9, 128.8, 127.2, 125.6 (q,  $J = 3.7$  Hz), 123.6 (q,  $J = 271.0$  Hz), 123.4, 122.2, 57.5, 56.4, 53.5, 39.7, 30.0, 21.6; HRMS calcd for  $\text{C}_{25}\text{H}_{24}\text{F}_3\text{N}_3\text{NaO}_4\text{S}_2^+$  ( $\text{M}+\text{Na}^+$ ): 552.1233, found: 552.1248.

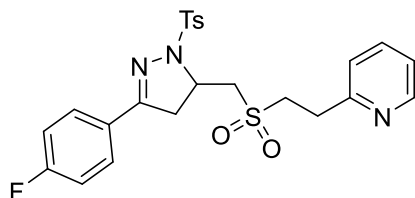

2-(2-(((3-(4-Fluorophenyl)-1-tosyl-4,5-dihydro-1H-pyrazol-5-yl)methyl)sulfonyl)ethyl)pyridine (**5e**)

$^1\text{H}$  NMR (400 MHz,  $\text{CDCl}_3$ )  $\delta$  (ppm) 8.57 (d,  $J = 4.0$  Hz, 1H), 7.80 (d,  $J = 8.2$  Hz, 2H), 7.69 – 7.63 (m, 3H), 7.32 – 7.27 (m, 3H), 7.22 – 7.18 (m, 1H), 7.06 (t,  $J = 8.6$  Hz, 2H), 4.25 – 4.14 (m, 2H), 3.71 – 3.66 (m, 2H), 3.45 – 3.35 (m, 4H), 3.25 (dd,  $J = 17.7, 10.1$  Hz, 1H), 2.39 (s, 3H);  $^{13}\text{C}$  NMR (101 MHz,  $\text{CDCl}_3$ )  $\delta$  (ppm) 164.31 (d,  $J = 252.3$  Hz), 157.4, 156.7, 149.6, 145.0, 136.9, 130.5, 129.8, 129.1 (d,  $J = 8.7$  Hz), 128.9, 126.45 (d,  $J = 3.4$  Hz), 123.5, 122.3, 115.9 (d,  $J = 22.1$  Hz), 57.6, 56.2, 53.5, 40.0, 30.1, 21.7; HRMS calcd for  $\text{C}_{24}\text{H}_{24}\text{FN}_3\text{NaO}_4\text{S}_2^+$  ( $\text{M}+\text{Na}^+$ ): 524.1084, found: 524.1096.

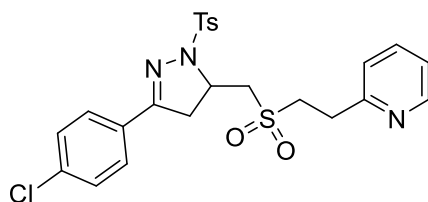

2-(2-(((3-(4-Chlorophenyl)-1-tosyl-4,5-dihydro-1H-pyrazol-5-yl)methyl)sulfonyl)ethyl)pyridine (**5f**)

$^1\text{H}$  NMR (400 MHz,  $\text{CDCl}_3$ )  $\delta$  (ppm) 8.57 (d,  $J = 4.4$  Hz, 1H), 7.79 (d,  $J = 8.2$  Hz, 2H), 7.67 (td,  $J = 7.7, 1.5$  Hz, 1H), 7.58 (d,  $J = 8.5$  Hz, 2H), 7.35 – 7.27 (m, 5H), 7.20 (dd,  $J = 7.0, 5.3$  Hz, 1H), 4.25 – 4.15 (m, 2H), 3.71 – 3.66 (m, 2H), 3.44 – 3.36 (m, 4H), 3.24 (dd,  $J = 17.7, 10.1$  Hz, 1H), 2.39 (s, 3H);  $^{13}\text{C}$  NMR (101 MHz,  $\text{CDCl}_3$ )  $\delta$  (ppm) 157.3, 156.6, 149.5, 145.0, 137.0, 136.9, 130.4, 129.8, 128.9, 128.8, 128.5, 128.2, 123.4, 122.2, 57.5, 56.2, 53.4, 39.8, 30.0, 21.6; HRMS calcd for  $\text{C}_{24}\text{H}_{24}\text{ClN}_3\text{NaO}_4\text{S}_2^+$  ( $\text{M}+\text{Na}^+$ ): 540.0789, found: 540.0798.

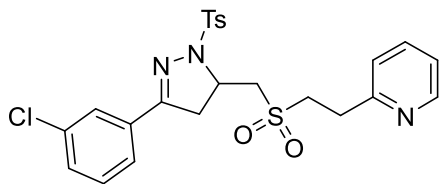

2-(2-(((3-(3-Chlorophenyl)-1-tosyl-4,5-dihydro-1*H*-pyrazol-5-yl)methyl)sulfonyl)ethyl)pyridine (**5g**)

$^1\text{H}$  NMR (400 MHz,  $\text{CDCl}_3$ )  $\delta$  (ppm) 8.57 (d,  $J = 4.6$  Hz, 1H), 7.80 (d,  $J = 8.2$  Hz, 2H), 7.69 – 7.65 (m, 2H), 7.50 (d,  $J = 7.6$  Hz, 1H), 7.39 – 7.36 (m, 1H), 7.33 – 7.28 (m, 4H), 7.21 (dd,  $J = 7.2, 5.1$  Hz, 1H), 4.26 – 4.15 (m, 2H), 3.69 (dd,  $J = 8.9, 6.6$  Hz, 2H), 3.45 – 3.35 (m, 4H), 3.24 (dd,  $J = 17.7, 10.3$  Hz, 1H), 2.40 (s, 3H);  $^{13}\text{C}$  NMR (101 MHz,  $\text{CDCl}_3$ )  $\delta$  (ppm) 157.1, 156.6, 149.5, 145.1, 136.9, 134.8, 131.8, 130.8, 130.4, 129.9, 129.8, 128.8, 126.8, 125.0, 123.4, 122.2, 57.5, 56.2, 53.5, 39.8, 30.0, 21.6; HRMS calcd for  $\text{C}_{24}\text{H}_{24}\text{ClN}_3\text{NaO}_4\text{S}_2^+$  ( $\text{M}+\text{Na}^+$ ): 540.0789, found: 540.0801.

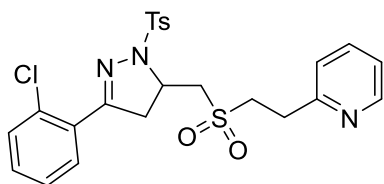

2-(2-(((3-(2-Chlorophenyl)-1-tosyl-4,5-dihydro-1*H*-pyrazol-5-yl)methyl)sulfonyl)ethyl)pyridine (**5h**)

$^1\text{H}$  NMR (400 MHz,  $\text{CDCl}_3$ )  $\delta$  (ppm) 8.58 (d,  $J = 4.3$  Hz, 1H), 7.83 (d,  $J = 8.2$  Hz, 2H), 7.67 (td,  $J = 7.7, 1.7$  Hz, 1H), 7.52 (dd,  $J = 7.6, 1.4$  Hz, 1H), 7.38 – 7.32 (m, 4H), 7.31 – 7.25 (m, 1H), 7.21 (dd,  $J = 7.1, 5.2$  Hz, 1H), 4.25 – 4.15 (m, 2H), 3.68 (dd,  $J = 8.9, 6.7$  Hz, 2H), 3.55 (dd,  $J = 18.0, 10.3$  Hz, 1H), 3.46 – 3.36 (m, 4H), 2.43 (s, 3H);  $^{13}\text{C}$  NMR (101 MHz,  $\text{CDCl}_3$ )  $\delta$  (ppm) 158.6, 156.7, 149.6, 145.1, 136.9, 132.9, 131.3, 130.6, 130.5, 129.8, 129.6, 129.1, 126.9, 123.4, 122.2, 57.6, 56.6, 53.5, 42.9, 30.1, 21.7; HRMS calcd for  $\text{C}_{24}\text{H}_{24}\text{ClN}_3\text{NaO}_4\text{S}_2^+$  ( $\text{M}+\text{Na}^+$ ): 540.0789, found: 540.0796.

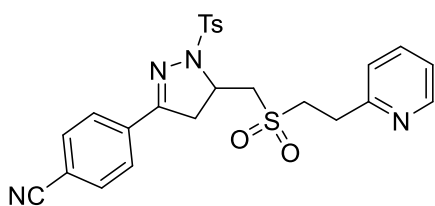

4-(5-(((2-(Pyridin-2-yl)ethyl)sulfonyl)methyl)-1-tosyl-4,5-dihydro-1*H*-pyrazol-3-yl)benzonitrile (**5i**)



$^1\text{H}$  NMR (400 MHz,  $\text{CDCl}_3$ )  $\delta$  (ppm) 8.58 (d,  $J = 4.1$  Hz, 1H), 7.79 (d,  $J = 8.3$  Hz, 2H), 7.75 (d,  $J = 8.5$  Hz, 2H), 7.70 – 7.65 (m, 3H), 7.34 – 7.27 (m, 3H), 7.22 (dd,  $J = 7.0, 5.2$  Hz, 1H), 4.32 – 4.15 (m, 2H), 3.72 – 3.67 (m, 2H), 3.49 – 3.55 (m, 4H), 3.28 (dd,  $J = 17.7, 10.4$  Hz, 1H), 2.41 (s, 3H);  $^{13}\text{C}$  NMR (101 MHz,  $\text{CDCl}_3$ )  $\delta$  (ppm) 156.5, 156.4, 149.6, 145.3, 136.9, 134.2, 132.4, 130.5, 129.9, 128.8, 127.3, 123.4, 122.3, 118.1, 114.1, 57.4, 56.5, 53.5, 39.5, 30.0, 21.6; HRMS calcd for  $\text{C}_{25}\text{H}_{24}\text{N}_4\text{NaO}_4\text{S}_2^+$  ( $\text{M}+\text{Na}^+$ ): 531.1131, found: 531.1142.

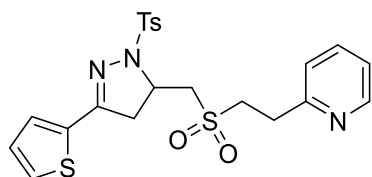

2-(2-(((3-(Thiophen-2-yl)-1-tosyl-4,5-dihydro-1H-pyrazol-5-yl)methyl)sulfonyl)ethyl)pyridine (**5j**)

$^1\text{H}$  NMR (400 MHz,  $\text{CDCl}_3$ )  $\delta$  (ppm) 8.58 (d,  $J = 4.5$  Hz, 1H), 7.79 (d,  $J = 8.2$  Hz, 2H), 7.67 (td,  $J = 7.7, 1.6$  Hz, 1H), 7.43 (d,  $J = 4.8$  Hz, 1H), 7.32 – 7.26 (m, 3H), 7.21 (dd,  $J = 7.2, 5.1$  Hz, 1H), 7.18 (d,  $J = 3.2$  Hz, 1H), 7.02 (dd,  $J = 4.8, 3.9$  Hz, 1H), 4.21 – 4.13 (m, 2H), 3.69 (d,  $J = 7.3$  Hz, 1H), 3.67 (d,  $J = 6.1$  Hz, 1H), 3.44 – 3.33 (m, 4H), 3.27 (dd,  $J = 17.5, 10.3$  Hz, 1H), 2.40 (s, 3H);  $^{13}\text{C}$  NMR (101 MHz,  $\text{CDCl}_3$ )  $\delta$  (ppm) 156.6, 153.9, 149.5, 144.9, 136.9, 133.5, 130.3, 129.8, 129.7, 129.0, 127.6, 123.4, 122.2, 57.5, 56.2, 53.5, 40.6, 30.1, 21.6; HRMS calcd for  $\text{C}_{22}\text{H}_{23}\text{N}_3\text{NaO}_4\text{S}_3^+$  ( $\text{M}+\text{Na}^+$ ): 512.0743, found: 512.0753.

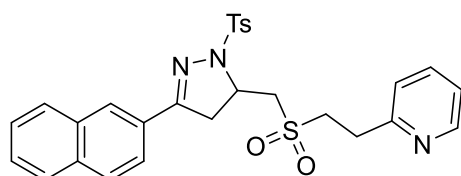

2-(2-(((3-(Naphthalen-2-yl)-1-tosyl-4,5-dihydro-1H-pyrazol-5-yl)methyl)sulfonyl)ethyl)pyridine (**5k**)

$^1\text{H}$  NMR (400 MHz,  $\text{CDCl}_3$ )  $\delta$  (ppm) 8.06 (s, 1H), 7.78 (d,  $J = 8.1$  Hz, 2H), 7.60 (d,  $J = 7.1$  Hz, 2H), 7.55 (d,  $J = 7.9$  Hz, 2H), 7.41 – 7.27 (m, 6H), 7.09 (t,  $J = 7.3$  Hz, 1H), 4.25 – 4.13 (m, 2H), 3.61 – 3.51 (m, 3H), 3.40 – 3.26 (m, 2H), 3.01 (t,  $J = 7.4$  Hz, 2H), 2.36 (s, 3H);  $^{13}\text{C}$  NMR (101 MHz,  $\text{CDCl}_3$ )  $\delta$  (ppm) 167.0, 158.8, 145.1, 137.6, 131.0, 130.3,

129.9, 129.9, 129.0, 128.8, 128.7, 127.0, 124.6, 120.0, 57.6, 56.0, 50.3, 39.9, 29.8, 21.6; HRMS calcd for  $C_{28}H_{27}N_3NaO_4S_2^+$  ( $M+Na^+$ ): 556.1335, found: 556.1342.

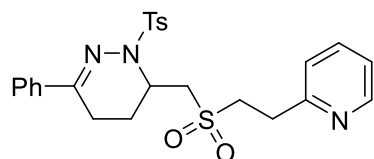

3-Phenyl-6-(((2-(pyridin-2-yl)ethyl)sulfonyl)methyl)-1-tosyl-1,4,5,6-tetrahydropyridazine (**5l**)

$^1H$  NMR (400 MHz,  $CDCl_3$ )  $\delta$  (ppm) 8.54 (d,  $J = 3.5$  Hz, 1H), 7.87 (d,  $J = 8.2$  Hz, 2H), 7.70 – 7.67 (m, 2H), 7.63 (t,  $J = 7.6$  Hz, 1H), 7.39 – 7.27 (m, 6H), 7.19 – 7.14 (m, 1H), 4.97 (s, 1H), 3.68 – 3.64 (m, 2H), 3.46 (dd,  $J = 14.0, 2.0$  Hz, 1H), 3.39 – 3.34 (m, 2H), 3.15 (dd,  $J = 14.0, 10.9$  Hz, 1H), 2.72 – 2.43 (m, 3H), 2.41 (s, 3H), 1.77 – 1.67 (m, 1H);  $^{13}C$  NMR (101 MHz,  $CDCl_3$ )  $\delta$  (ppm) 156.8, 149.5, 148.5, 144.4, 136.9, 136.3, 135.0, 129.7, 129.6, 128.4, 128.0, 125.3, 123.5, 122.1, 53.7, 53.5, 46.5, 30.0, 21.6, 21.0, 17.9; HRMS calcd for  $C_{25}H_{27}N_3NaO_4S_2^+$  ( $M+Na^+$ ): 520.1335, found: 520.1346.

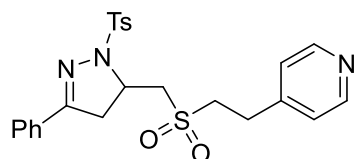

5-(*p*-Tolyl)-2-(((4-(trifluoromethyl)benzyl)sulfonyl)methyl)-3,4-dihydro-2H-pyrrole (**5m**)

$^1H$  NMR (400 MHz,  $CDCl_3$ )  $\delta$  (ppm) 8.59 (s, 2H), 7.78 (d,  $J = 8.2$  Hz, 2H), 7.64 (d,  $J = 6.9$  Hz, 2H), 7.44 – 7.34 (m, 3H), 7.30 (d,  $J = 8.1$  Hz, 2H), 7.26 (d,  $J = 3.3$  Hz, 2H), 4.22 (qd,  $J = 10.3, 2.2$  Hz, 1H), 4.09 (dd,  $J = 14.0, 2.3$  Hz, 1H), 3.57 (dd,  $J = 14.0, 9.7$  Hz, 1H), 3.50 – 3.44 (m, 2H), 3.38 (dd,  $J = 10.5, 4.6$  Hz, 2H), 3.27 – 3.20 (m, 2H), 2.39 (s, 3H);  $^{13}C$  NMR (101 MHz,  $CDCl_3$ )  $\delta$  (ppm) 158.7, 150.2, 146.3, 145.1, 131.0, 130.4, 129.9, 129.8, 128.8, 128.7, 127.0, 123.8, 57.2, 56.0, 54.8, 39.7, 27.4, 21.6; HRMS calcd for  $C_{24}H_{25}N_3NaO_4S_2^+$  ( $M+Na^+$ ): 506.1179, found: 506.1185.

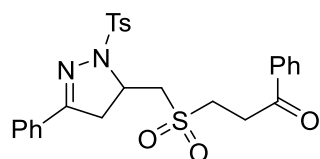

1-Phenyl-3-(((3-phenyl-1-tosyl-4,5-dihydro-1H-pyrazol-5-yl)methyl)sulfonyl)propan-1-one (**5n**)

$^1\text{H}$  NMR (400 MHz, DMSO)  $\delta$  (ppm) 8.05 (d,  $J$  = 7.5 Hz, 2H), 7.75 (d,  $J$  = 8.1 Hz, 2H), 7.70 – 7.65 (m, 3H), 7.57 (t,  $J$  = 7.6 Hz, 2H), 7.49 – 7.42 (m, 5H), 4.22 (q,  $J$  = 9.2 Hz, 1H), 4.05 – 3.92 (m, 1H), 3.69 – 3.58 (m, 4H), 3.51 (dd,  $J$  = 17.6, 11.0 Hz, 1H), 3.39 – 3.30 (m, 1H), 2.36 (s, 3H);  $^{13}\text{C}$  NMR (101 MHz, DMSO)  $\delta$  (ppm) 196.5, 159.9, 145.3, 136.4, 134.1, 131.4, 131.2, 130.6, 130.4, 129.3, 129.3, 128.9, 128.6, 127.4, 57.2, 56.5, 49.0, 39.9, 31.6, 21.6; HRMS calcd for  $\text{C}_{26}\text{H}_{26}\text{N}_2\text{NaO}_5\text{S}_2^+$  ( $\text{M}+\text{Na}^+$ ): 533.1175, found: 533.1186.

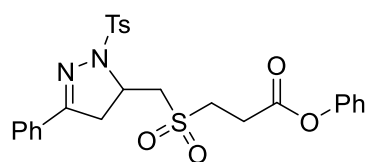

Phenyl 3-(((3-phenyl-1-tosyl-4,5-dihydro-1H-pyrazol-5-yl)methyl)sulfonyl)propanoate  
(5o)

$^1\text{H}$  NMR (400 MHz,  $\text{CDCl}_3$ )  $\delta$  (ppm) 7.80 (d,  $J$  = 8.2 Hz, 2H), 7.65 (d,  $J$  = 6.9 Hz, 2H), 7.44 – 7.35 (m, 5H), 7.30 – 7.25 (m, 3H), 7.14 (d,  $J$  = 7.7 Hz, 2H), 4.26 – 4.16 (m, 2H), 3.64 – 3.50 (m, 3H), 3.42 (dd,  $J$  = 17.6, 10.5 Hz, 1H), 3.34 – 3.26 (m, 1H), 3.21 (t,  $J$  = 7.3 Hz, 2H), 2.38 (s, 3H);  $^{13}\text{C}$  NMR (101 MHz,  $\text{CDCl}_3$ )  $\delta$  (ppm) 168.8, 158.4, 150.3, 145.0, 131.0, 130.5, 130.0, 129.8, 129.5, 128.9, 128.7, 127.0, 126.2, 121.3, 57.86, 56.0, 49.9, 39.9, 27.2, 21.6; HRMS calcd for  $\text{C}_{26}\text{H}_{26}\text{N}_2\text{NaO}_6\text{S}_2^+$  ( $\text{M}+\text{Na}^+$ ): 549.1124, found: 549.1132.

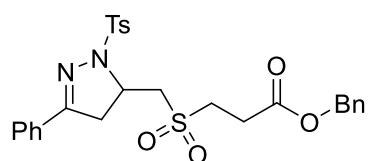

Benzyl 3-(((3-phenyl-1-tosyl-4,5-dihydro-1H-pyrazol-5-yl)methyl)sulfonyl)propanoate  
(5p)

$^1\text{H}$  NMR (400 MHz,  $\text{CDCl}_3$ )  $\delta$  (ppm) 7.79 (d,  $J$  = 8.3 Hz, 2H), 7.64 (d,  $J$  = 6.7 Hz, 2H), 7.43 – 7.32 (m, 8H), 7.28 (d,  $J$  = 8.1 Hz, 2H), 5.19 (s, 2H), 4.21 – 4.12 (m, 2H), 3.52 – 3.35 (m, 4H), 3.23 (dd,  $J$  = 17.7, 10.0 Hz, 1H), 2.99 (t,  $J$  = 7.4 Hz, 2H), 2.38 (s, 3H);  $^{13}\text{C}$  NMR (101 MHz,  $\text{CDCl}_3$ )  $\delta$  (ppm) 169.9, 158.4, 144.9, 135.1, 130.9, 130.5, 130.0, 129.8, 128.84, 128.6, 128.6, 128.5, 128.4, 127.0, 67.3, 57.8, 56.0, 49.9, 39.9, 27.1, 21.6; HRMS calcd for  $\text{C}_{27}\text{H}_{28}\text{N}_2\text{NaO}_6\text{S}_2^+$  ( $\text{M}+\text{Na}^+$ ): 563.1281, found: 563.1287.

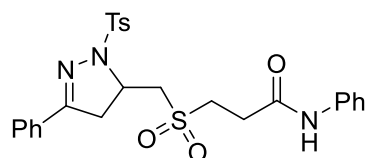

*N*-Phenyl-3-(((3-phenyl-1-tosyl-4,5-dihydro-1*H*-pyrazol-5-yl)methyl)sulfonyl)propanamide (**5q**)

$^1\text{H}$  NMR (400 MHz,  $\text{CDCl}_3$ )  $\delta$  (ppm) 8.58 (d,  $J = 4.1$  Hz, 1H), 7.96 (dd,  $J = 8.7, 1.5$  Hz, 1H), 7.88 – 7.78 (m, 6H), 7.67 (td,  $J = 7.7, 1.7$  Hz, 1H), 7.54 – 7.46 (m, 2H), 7.29 (d,  $J = 8.1$  Hz, 3H), 7.21 (dd,  $J = 7.0, 5.2$  Hz, 1H), 4.28 – 4.19 (m, 2H), 3.72 (d,  $J = 7.2$  Hz, 1H), 3.70 (d,  $J = 6.0$  Hz, 1H), 3.56 (dd,  $J = 17.5, 10.7$  Hz, 1H), 3.45 – 3.33 (m, 4H), 2.36 (s, 3H);  $^{13}\text{C}$  NMR (101 MHz,  $\text{CDCl}_3$ )  $\delta$  (ppm) 158.4, 156.7, 149.5, 144.9, 136.9, 134.3, 132.7, 130.5, 129.8, 128.9, 128.5, 128.5, 127.9, 127.7, 127.6, 127.6, 126.8, 123.4, 123.3, 122.2, 57.7, 56.2, 53.5, 39.9, 30.1, 21.6; HRMS calcd for  $\text{C}_{26}\text{H}_{27}\text{N}_3\text{NaO}_5\text{S}_2^+$  ( $\text{M}+\text{Na}^+$ ): 548.1284, found: 548.1296.

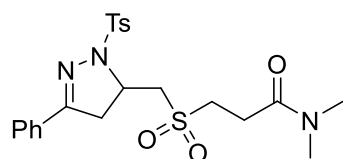

*N,N*-Dimethyl-3-(((3-phenyl-1-tosyl-4,5-dihydro-1*H*-pyrazol-5-yl)methyl)sulfonyl)propanamide (**5r**)

$^1\text{H}$  NMR (400 MHz,  $\text{CDCl}_3$ )  $\delta$  (ppm) 7.81 (d,  $J = 8.1$  Hz, 2H), 7.66 (d,  $J = 6.9$  Hz, 2H), 7.44 – 7.36 (m, 3H), 7.31 (d,  $J = 8.0$  Hz, 2H), 4.24 – 4.15 (m, 2H), 3.54 (t,  $J = 7.4$  Hz, 2H), 3.49 – 3.39 (m, 2H), 3.26 (dd,  $J = 17.7, 10.1$  Hz, 1H), 3.08 (s, 3H), 3.01 (s, 3H), 2.94 (t,  $J = 7.4$  Hz, 2H), 2.39 (s, 3H);  $^{13}\text{C}$  NMR (101 MHz,  $\text{CDCl}_3$ )  $\delta$  (ppm) 168.5, 158.3, 144.9, 130.9, 130.6, 130.1, 129.8, 128.9, 128.7, 127.0, 58.0, 56.1, 50.4, 40.0, 37.1, 35.8, 26.0, 21.6; HRMS calcd for  $\text{C}_{22}\text{H}_{27}\text{N}_3\text{NaO}_5\text{S}_2^+$  ( $\text{M}+\text{Na}^+$ ): 500.1284, found: 500.1299.

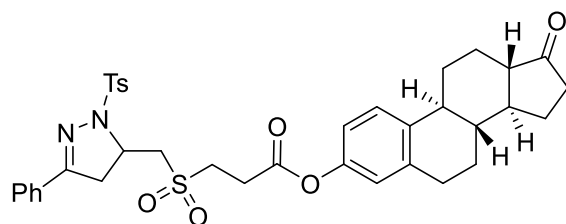

(8*S*,9*S*,13*S*,14*S*)-17-oxo-7,8,9,11,12,13,14,15,16,17-decahydro-6*H*-cyclopenta[*a*]phenanthren-3-yl

3-(((3-phenyl-1-tosyl-4,5-dihydro-1*H*-pyrazol-5-yl)methyl)sulfonyl)propanoate (**5s**)

<sup>1</sup>H NMR (400 MHz, CDCl<sub>3</sub>) δ (ppm) 7.81 (d, *J* = 8.3 Hz, 2H), 7.66 (dd, *J* = 8.1, 1.4 Hz, 2H), 7.44 – 7.35 (m, 3H), 7.30 (d, *J* = 8.3 Hz, 3H), 6.92 – 6.87 (m, 2H), 4.26 – 4.16 (m, 2H), 3.62 – 3.39 (m, 4H), 3.29 (dd, *J* = 17.7, 9.9 Hz, 1H), 3.19 (t, *J* = 7.3 Hz, 2H), 2.92 (dd, *J* = 8.5, 3.8 Hz, 2H), 2.55 – 2.40 (m, 2H), 2.39 (s, 3H), 2.32 – 2.25 (m, 1H), 2.19 – 1.94 (m, 4H), 1.63 – 1.42 (m, 6H), 0.88 – 0.83 (m, 1H); <sup>13</sup>C NMR (101 MHz, CDCl<sub>3</sub>) δ (ppm) 169.1, 158.4, 148.2, 145.0, 138.2, 137.8, 131.0, 130.5, 130.0, 129.8, 128.9, 128.7, 127.0, 126.5, 121.3, 118.5, 57.9, 56.0, 50.4, 50.0, 47.9, 44.1, 39.9, 37.9, 35.8, 31.5, 29.3, 27.3, 26.3, 25.7, 21.5, 13.8; HRMS calcd for C<sub>37</sub>H<sub>40</sub>N<sub>2</sub>NaO<sub>7</sub>S<sub>2</sub><sup>+</sup> (M+Na<sup>+</sup>): 711.2169, found: 711.2175.

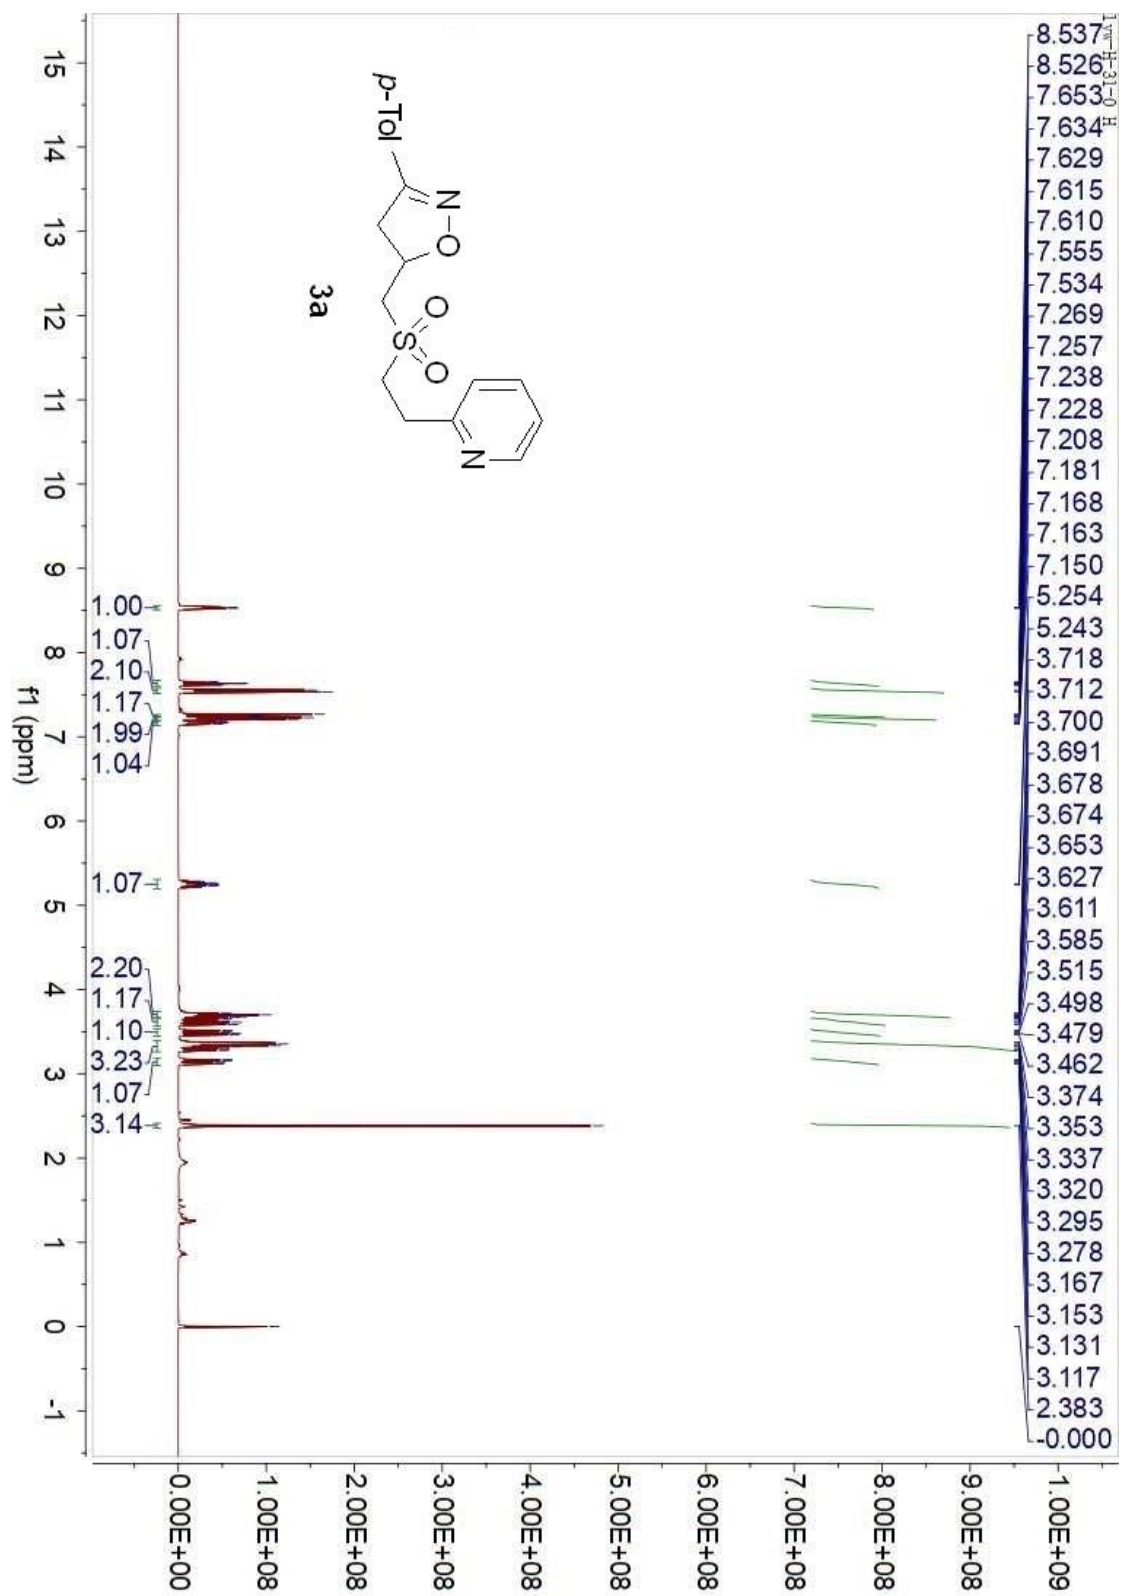

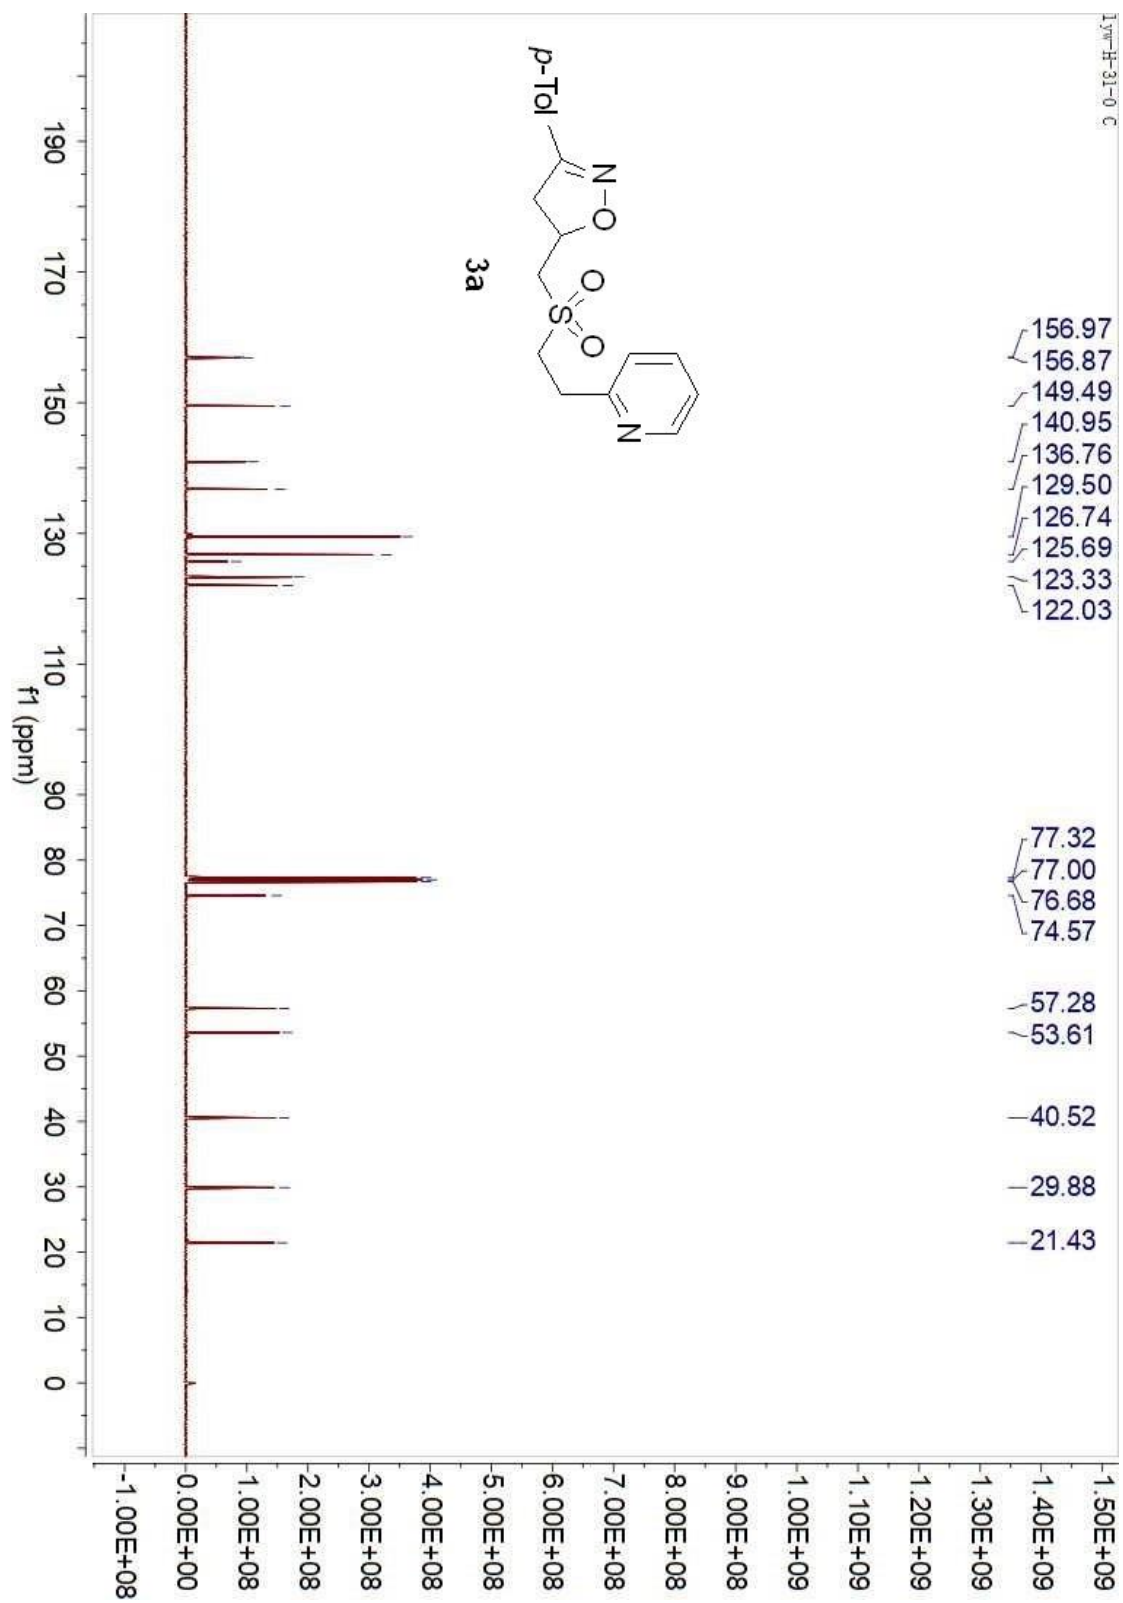

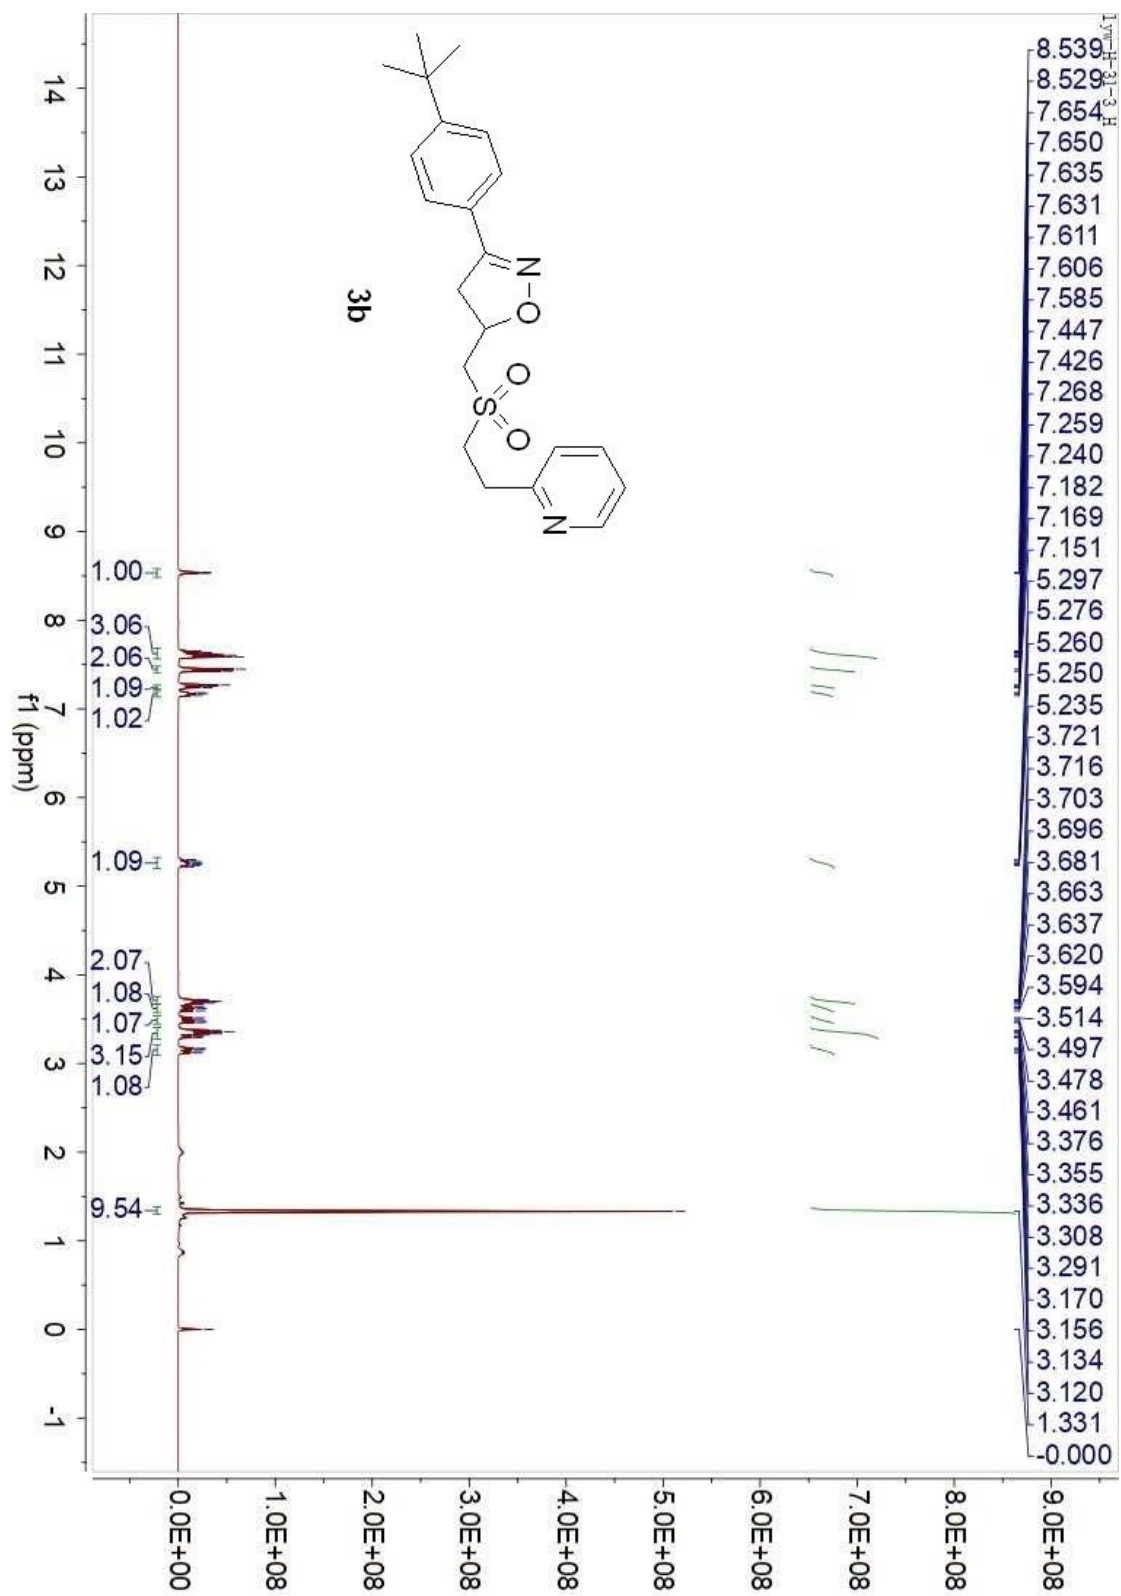



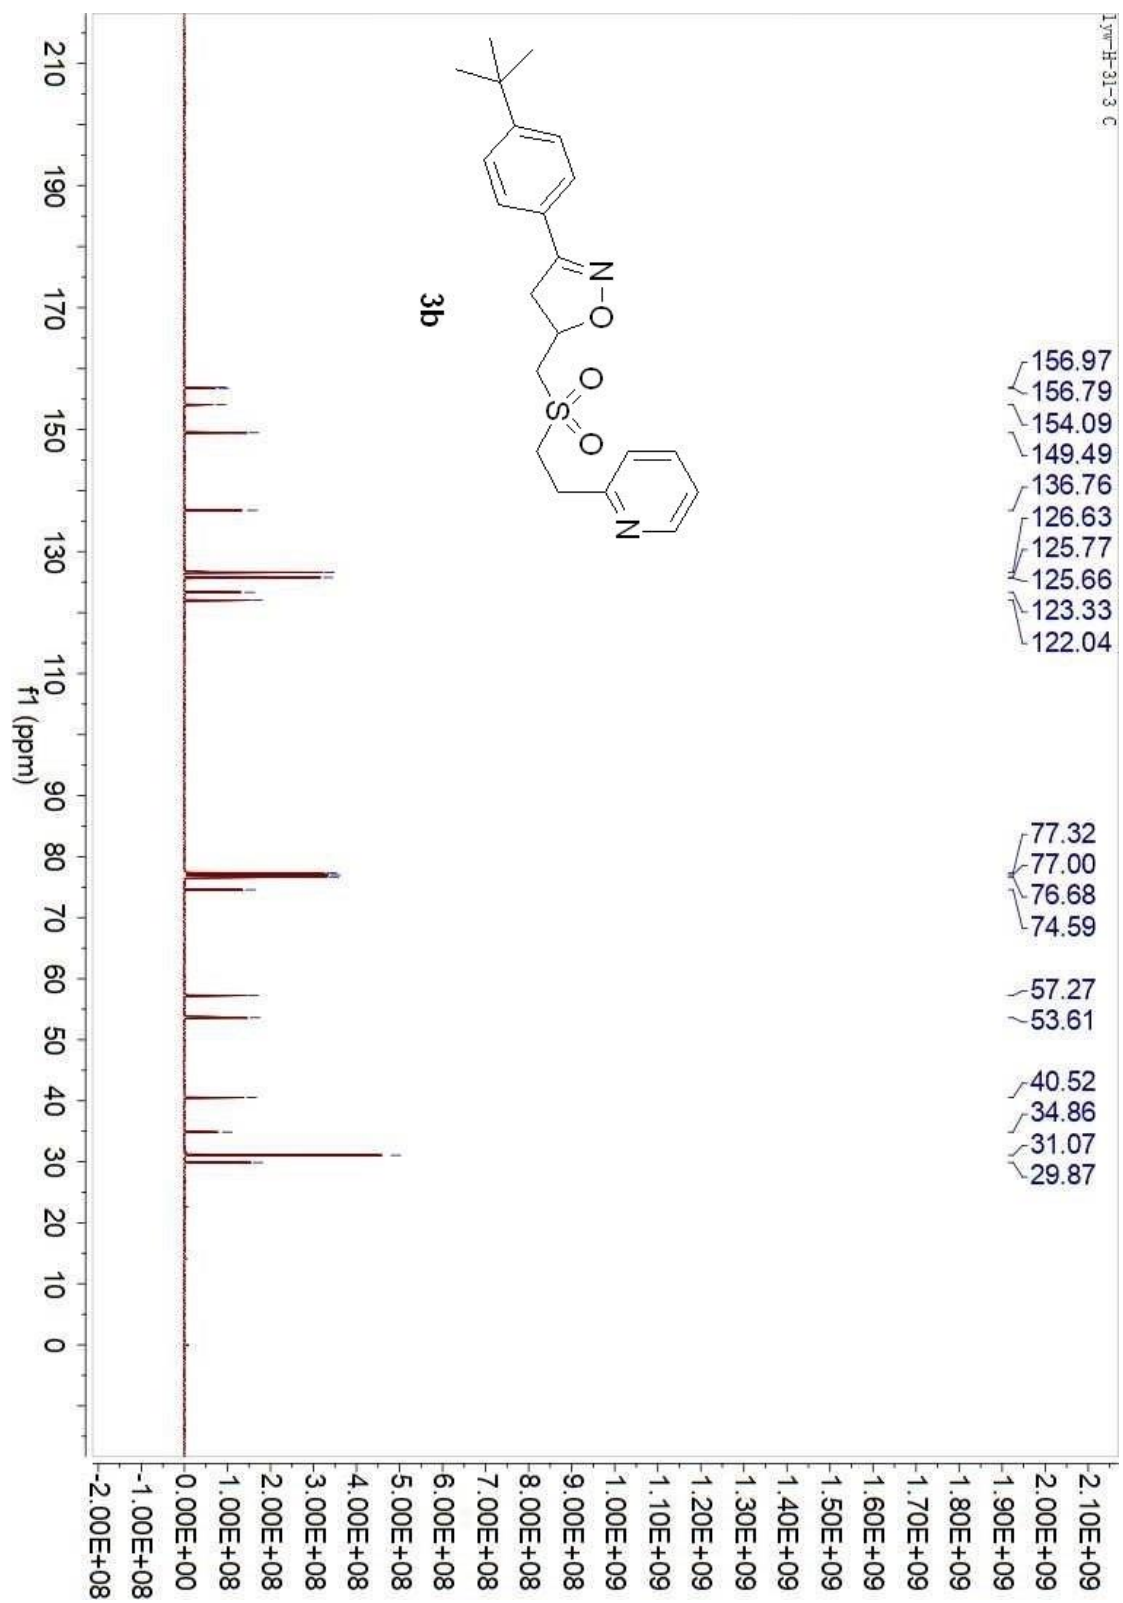

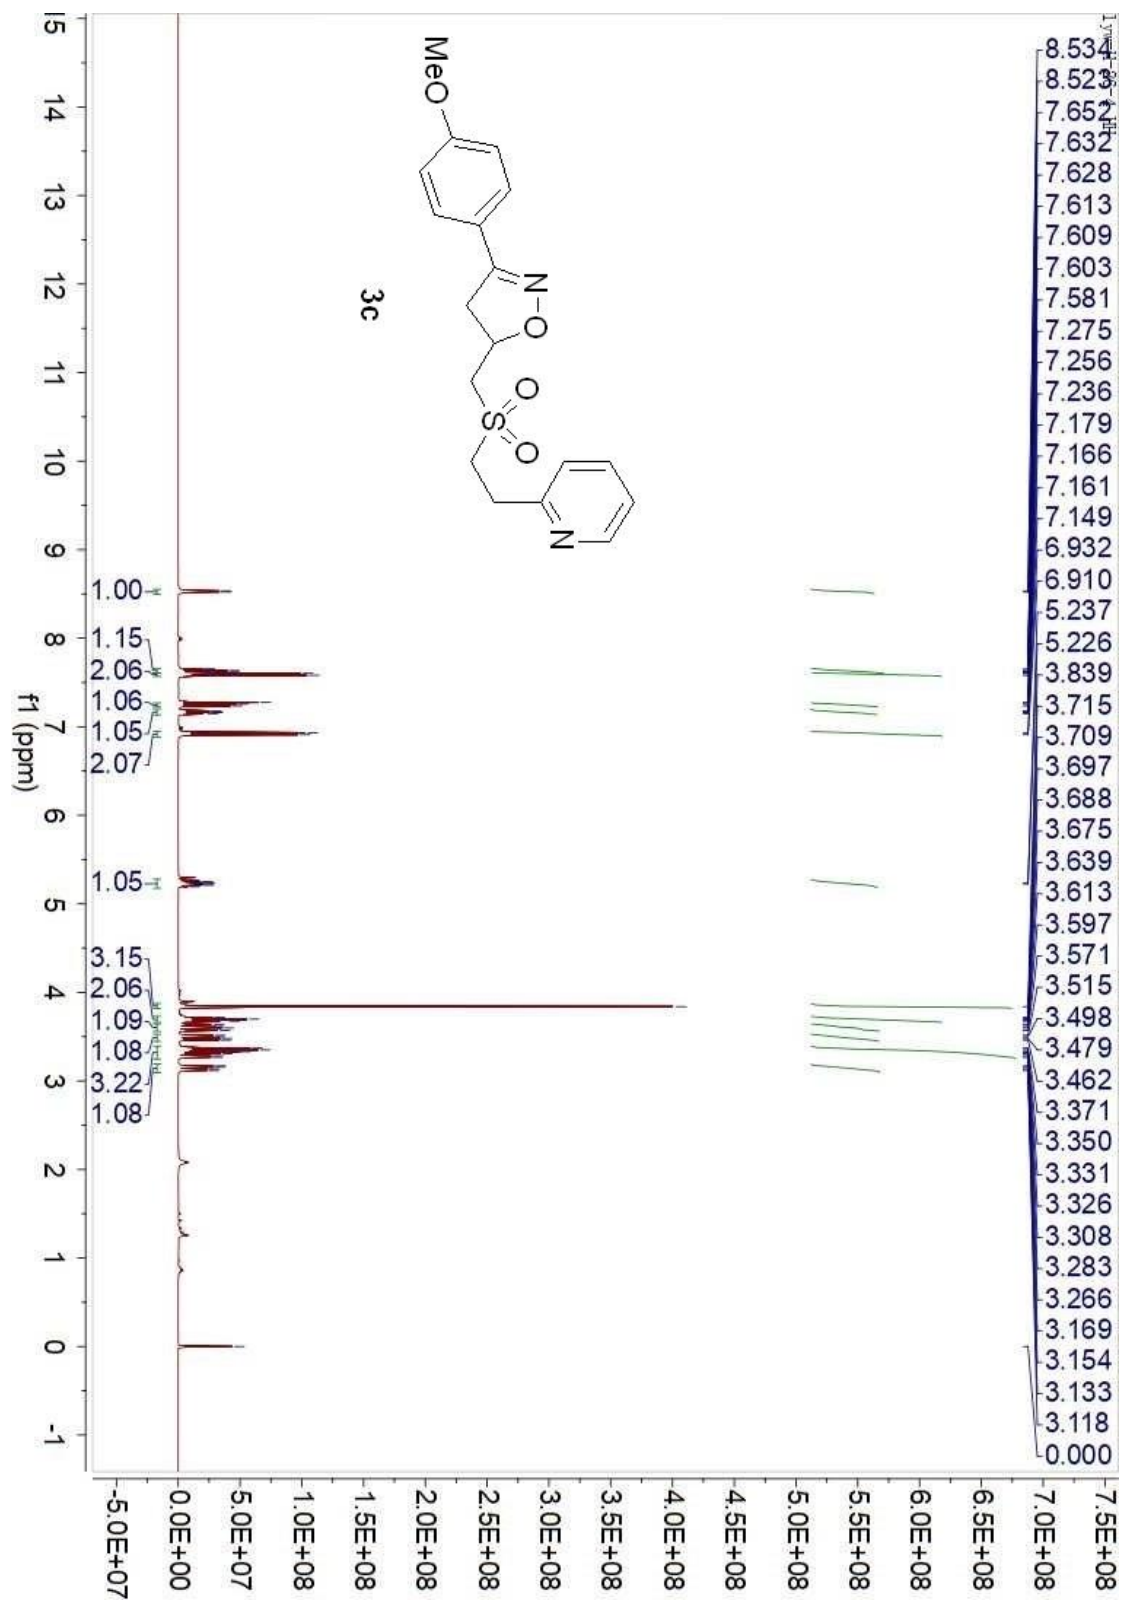

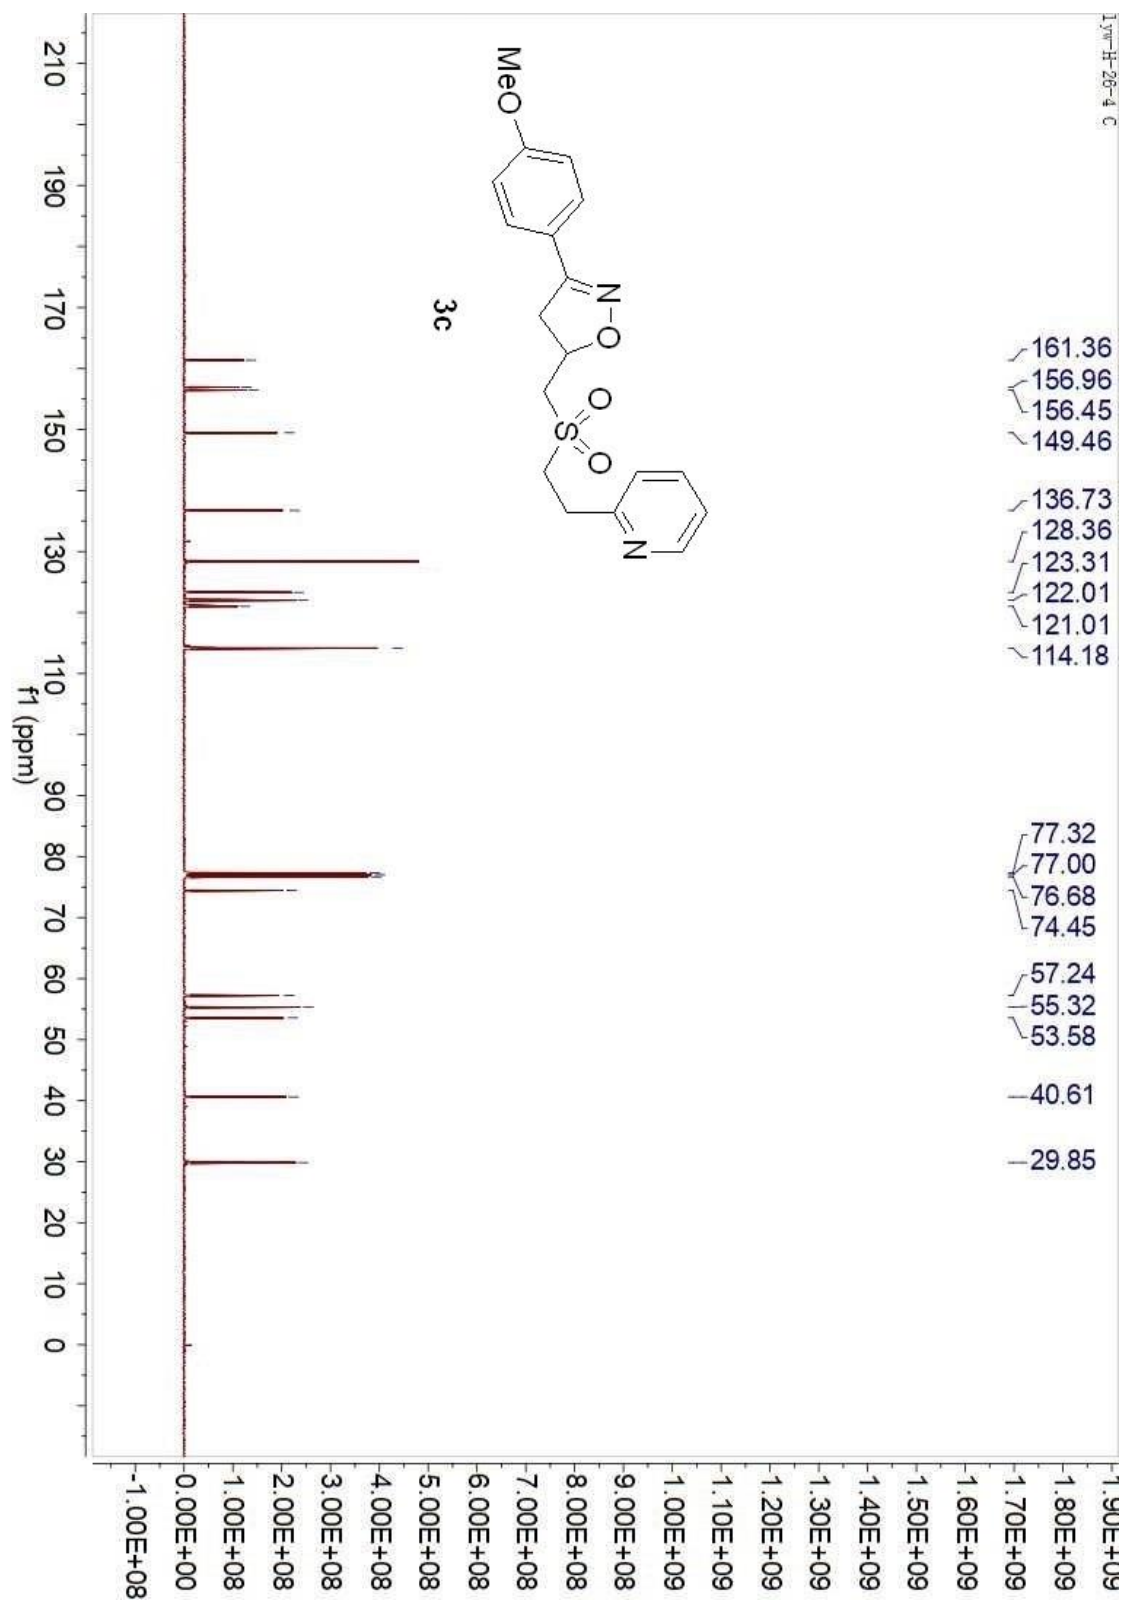

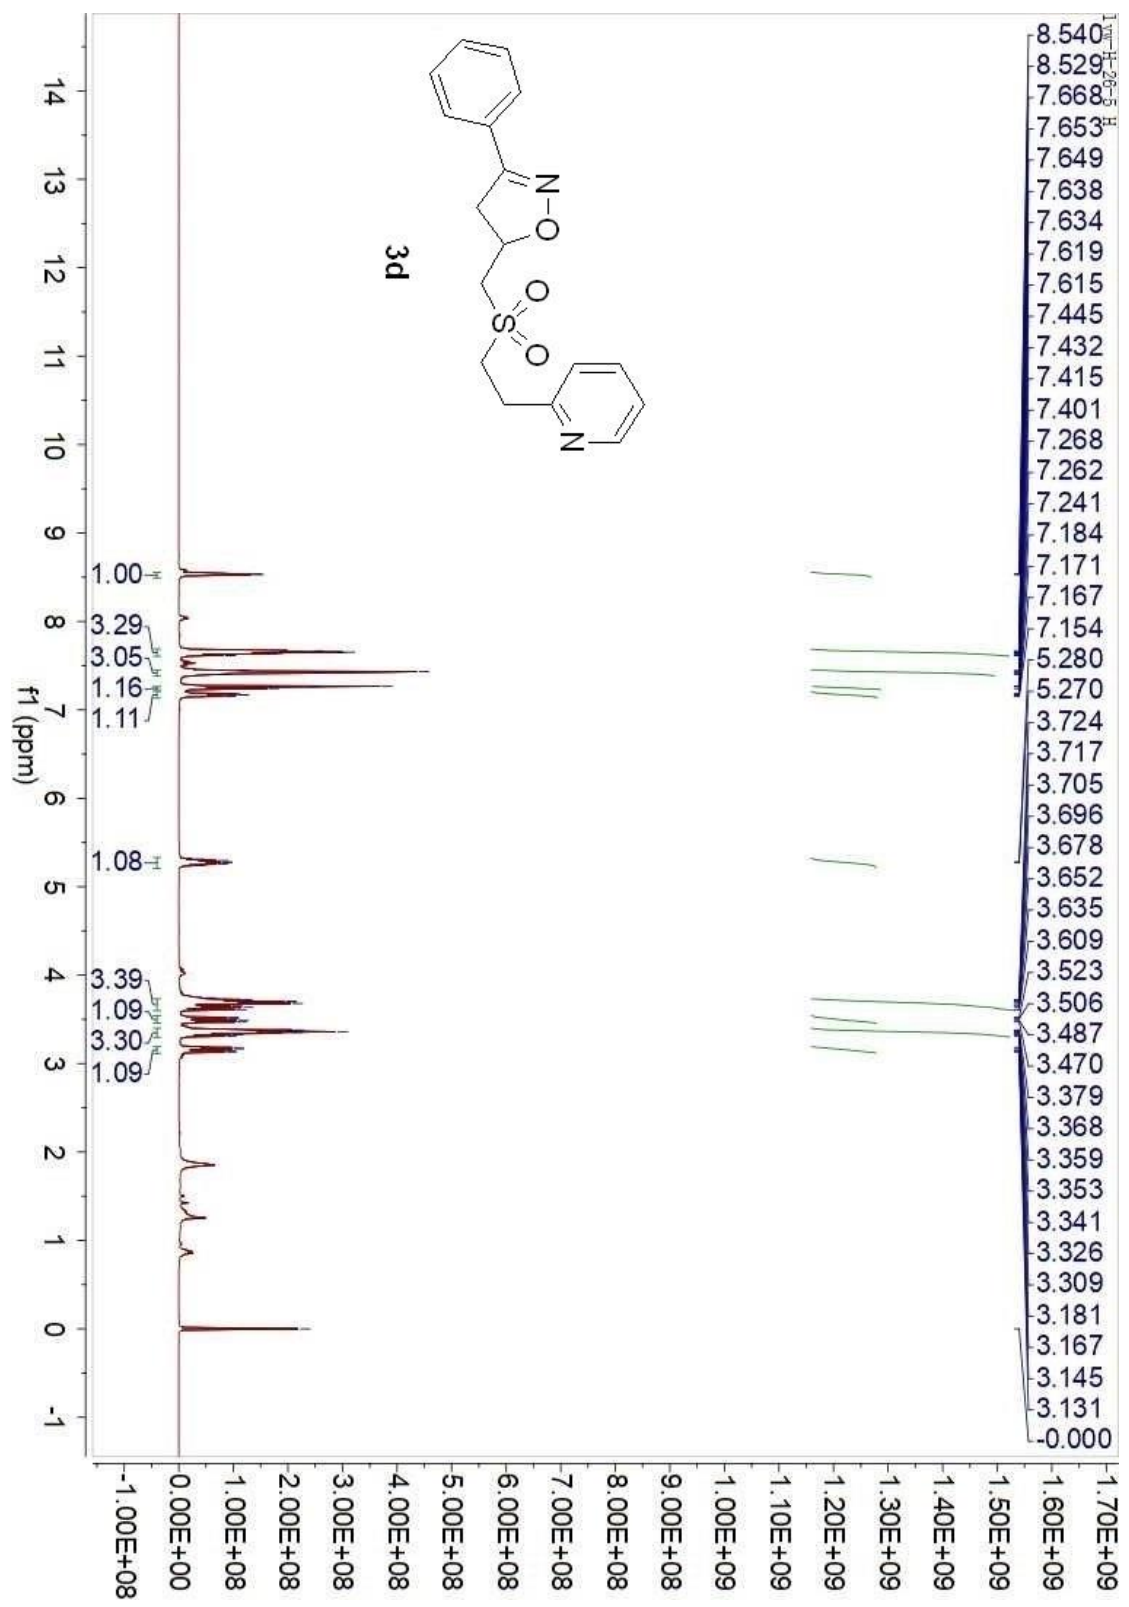

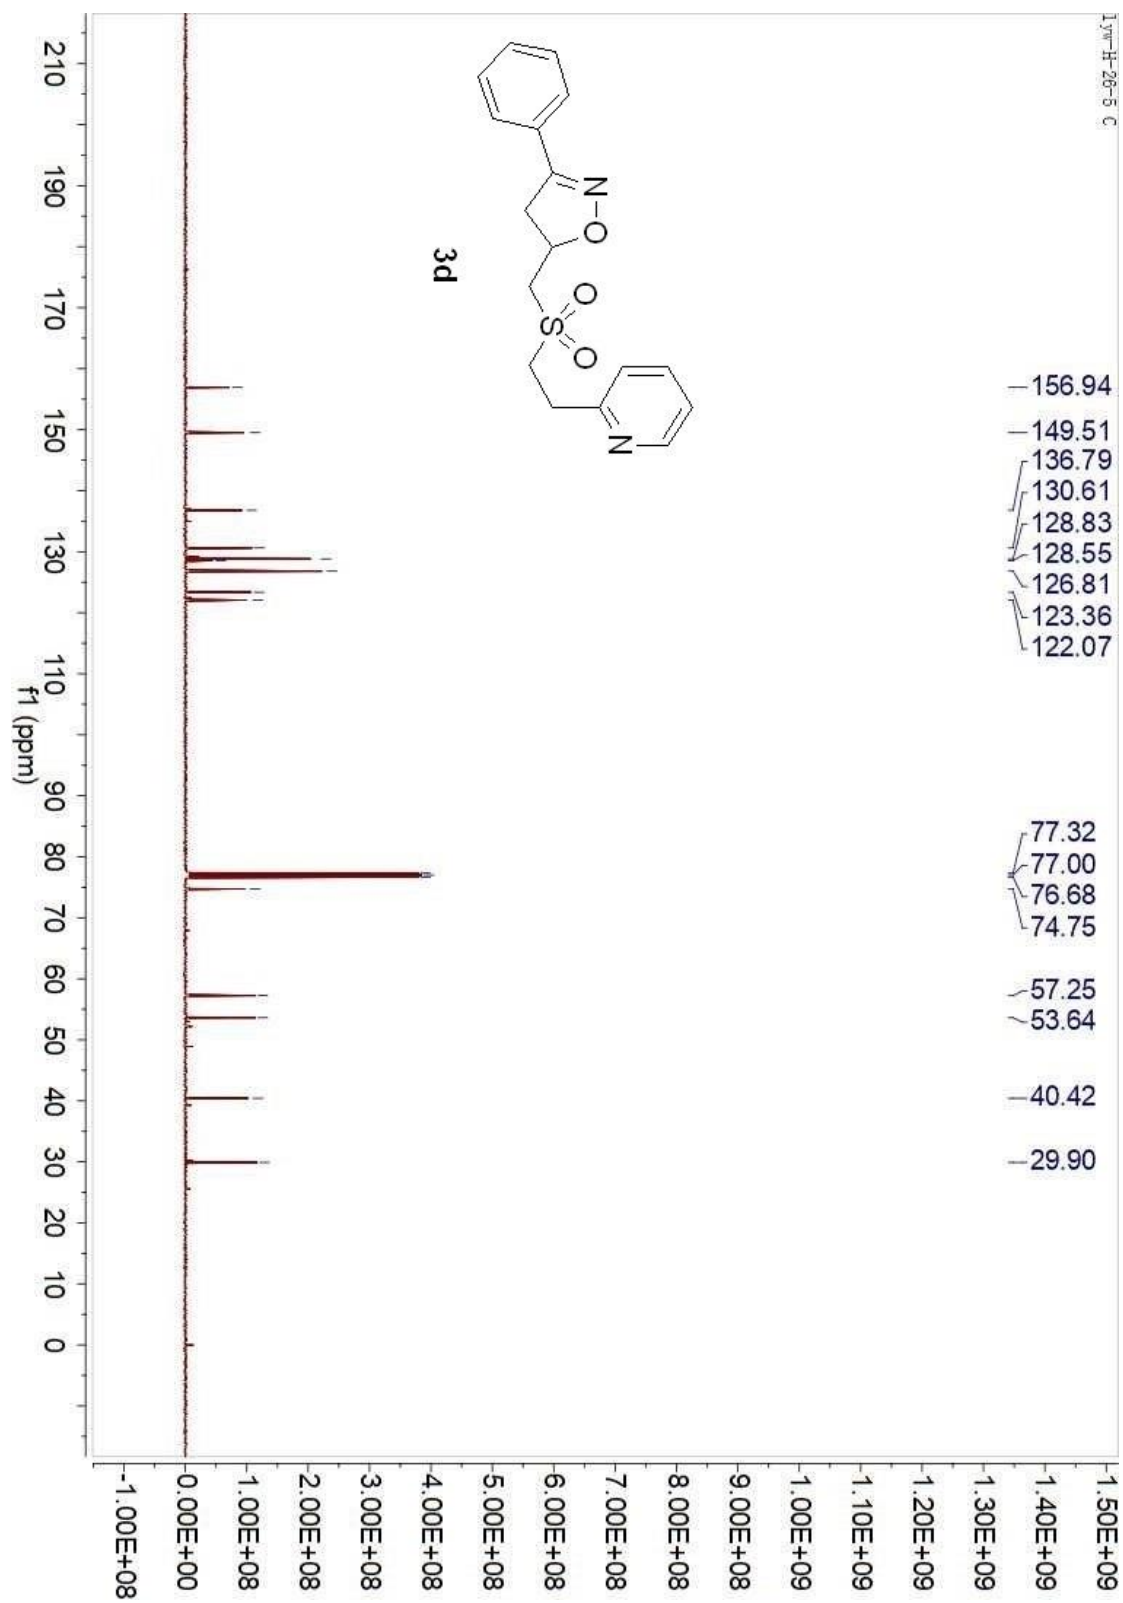

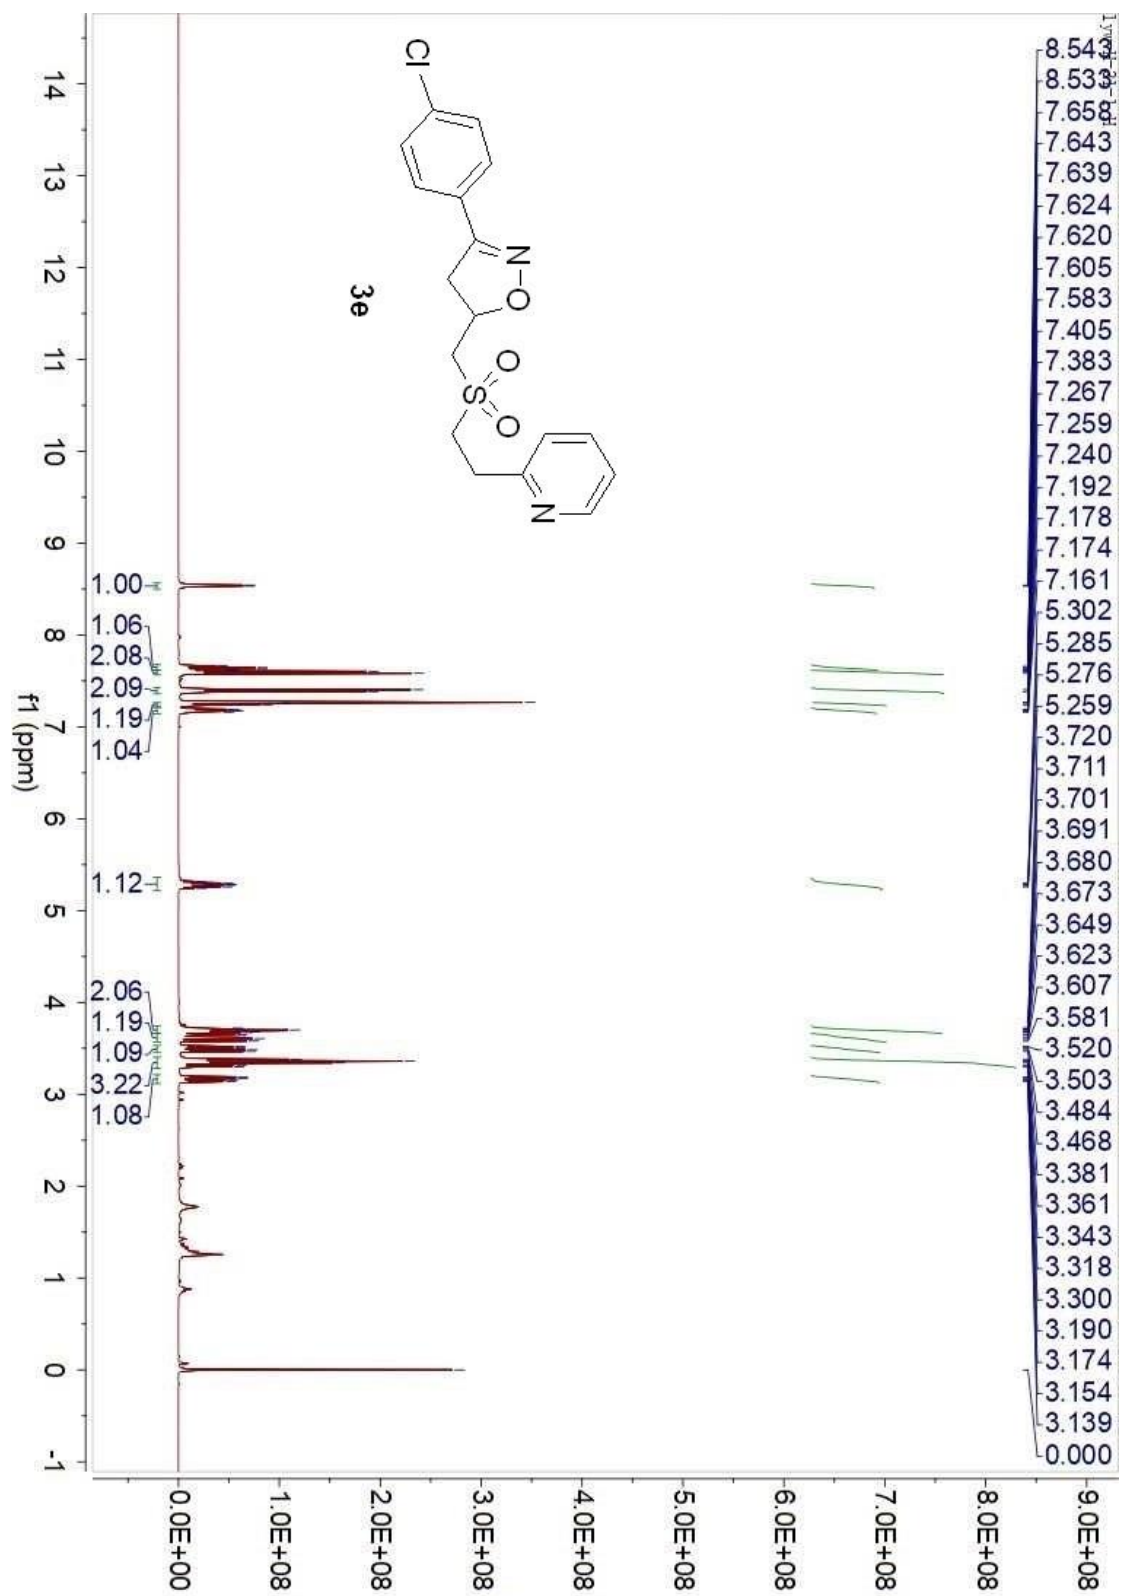

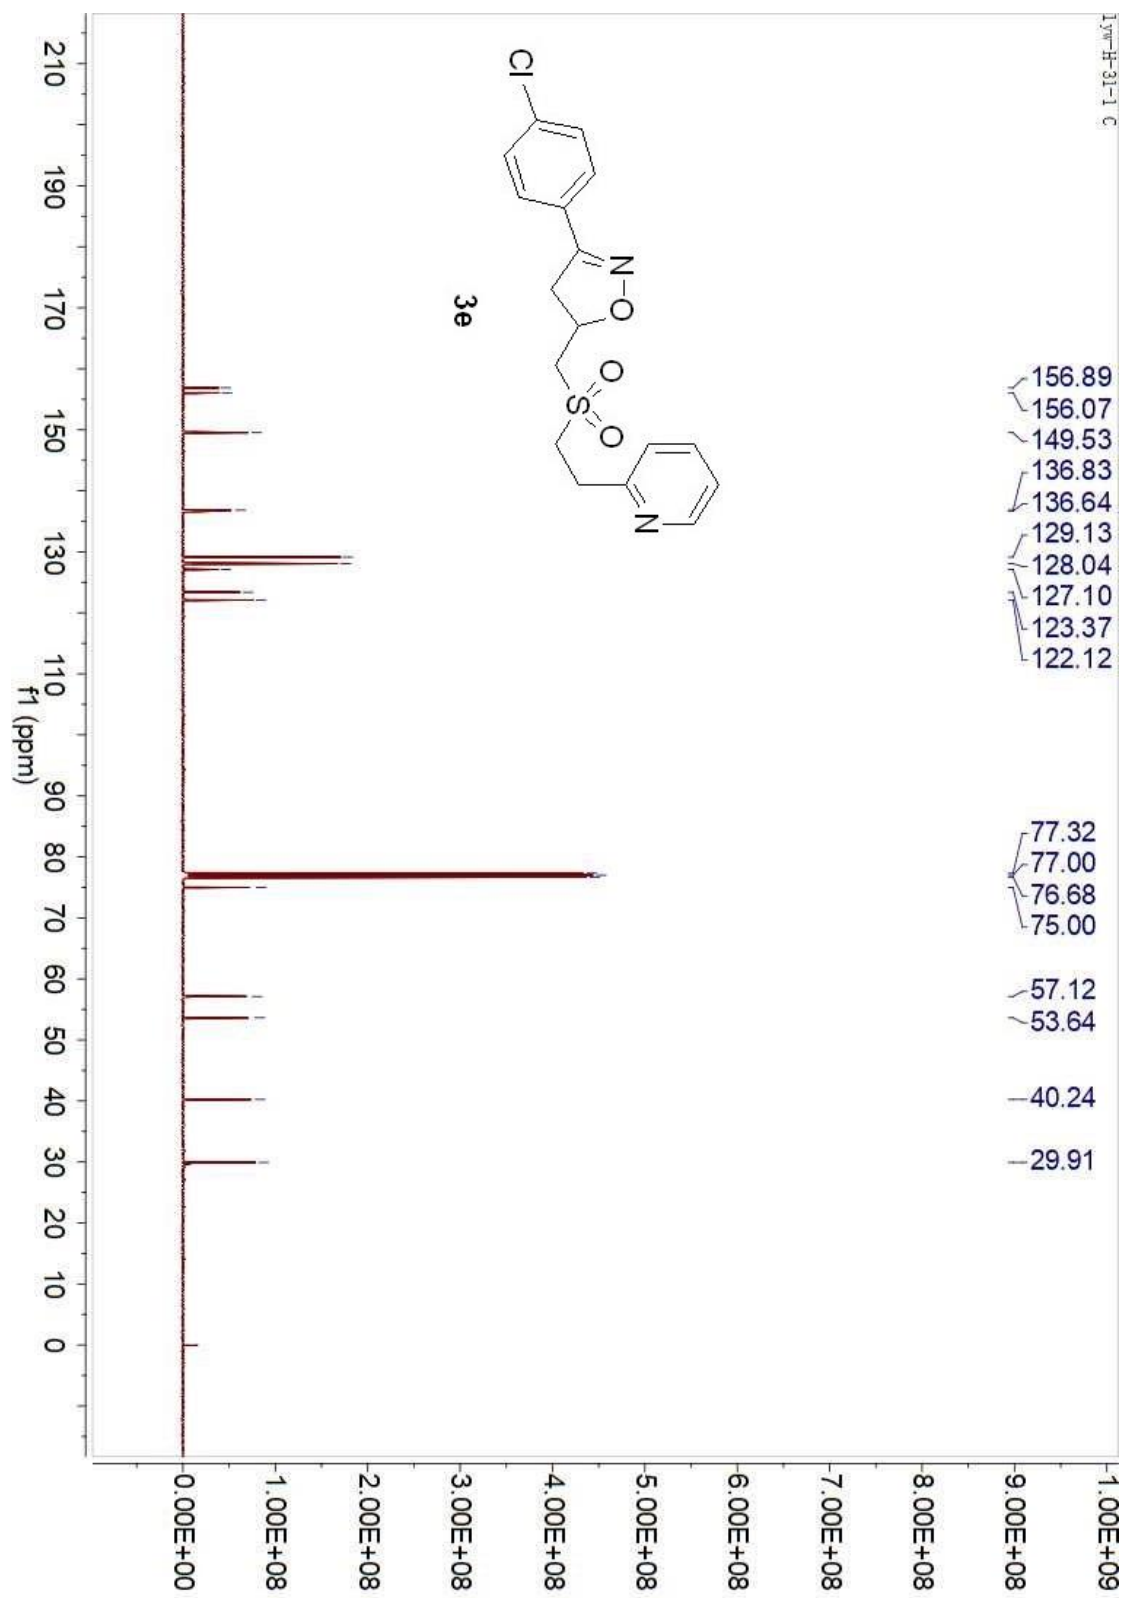

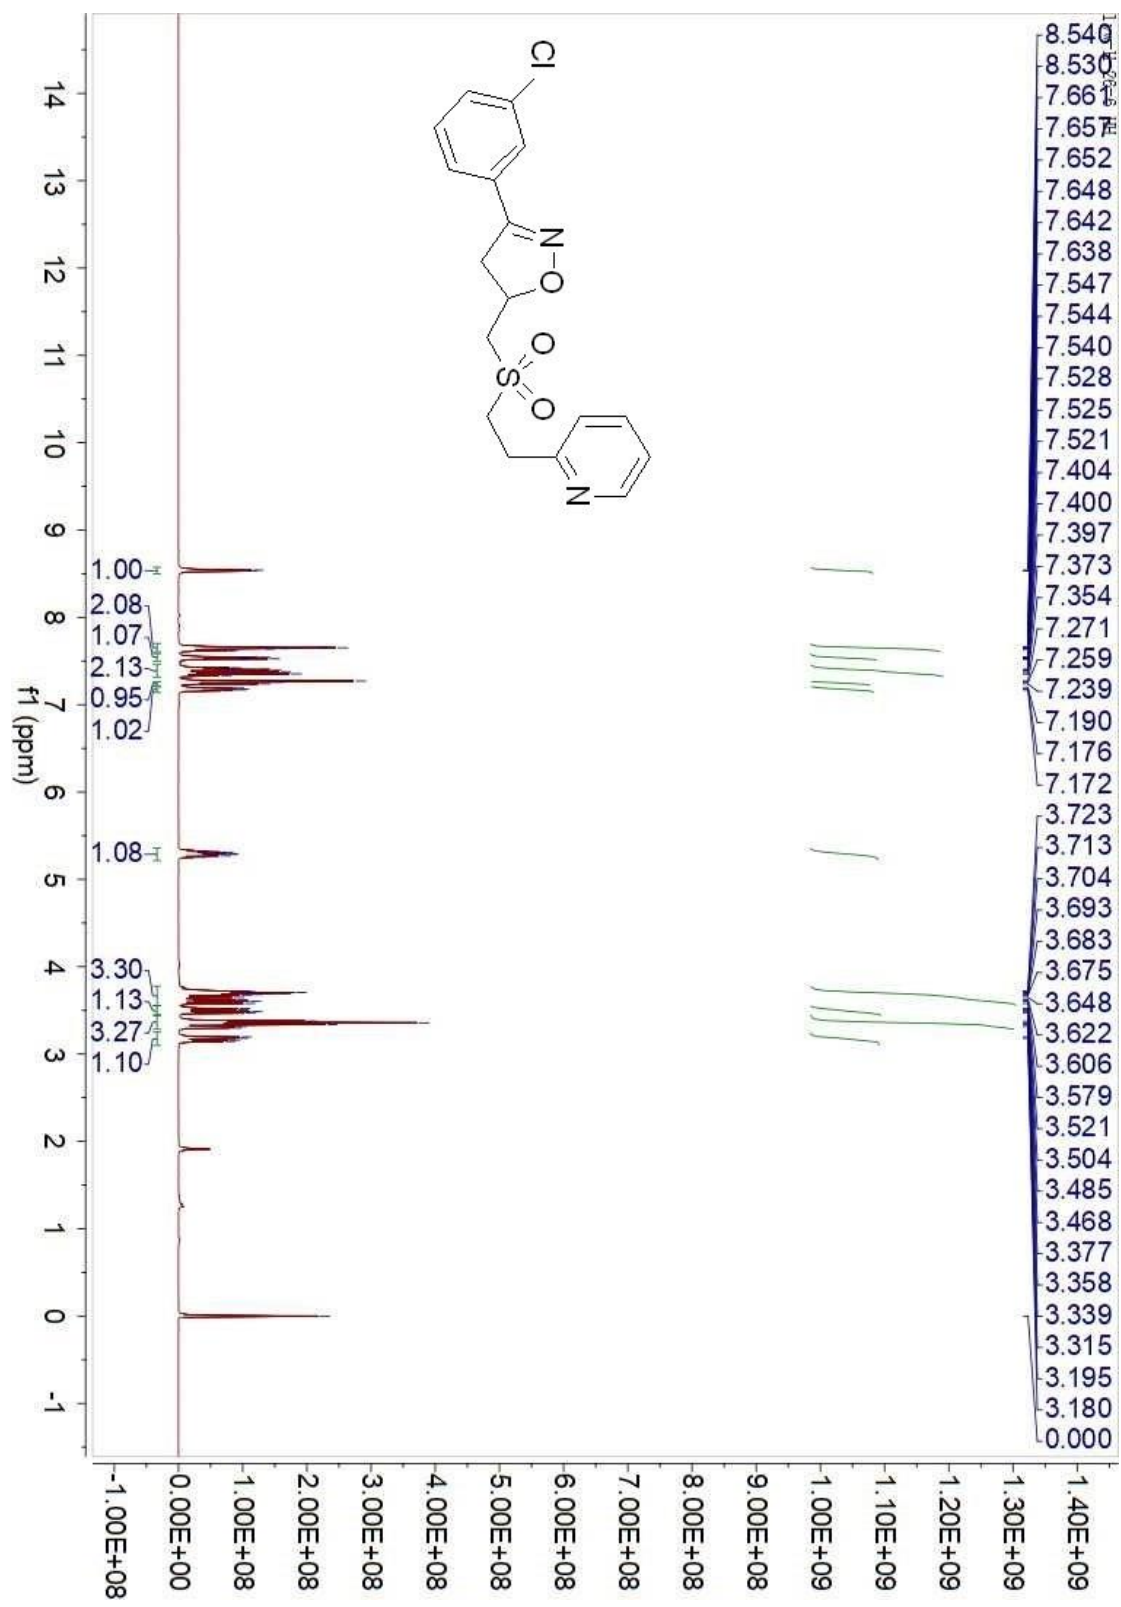



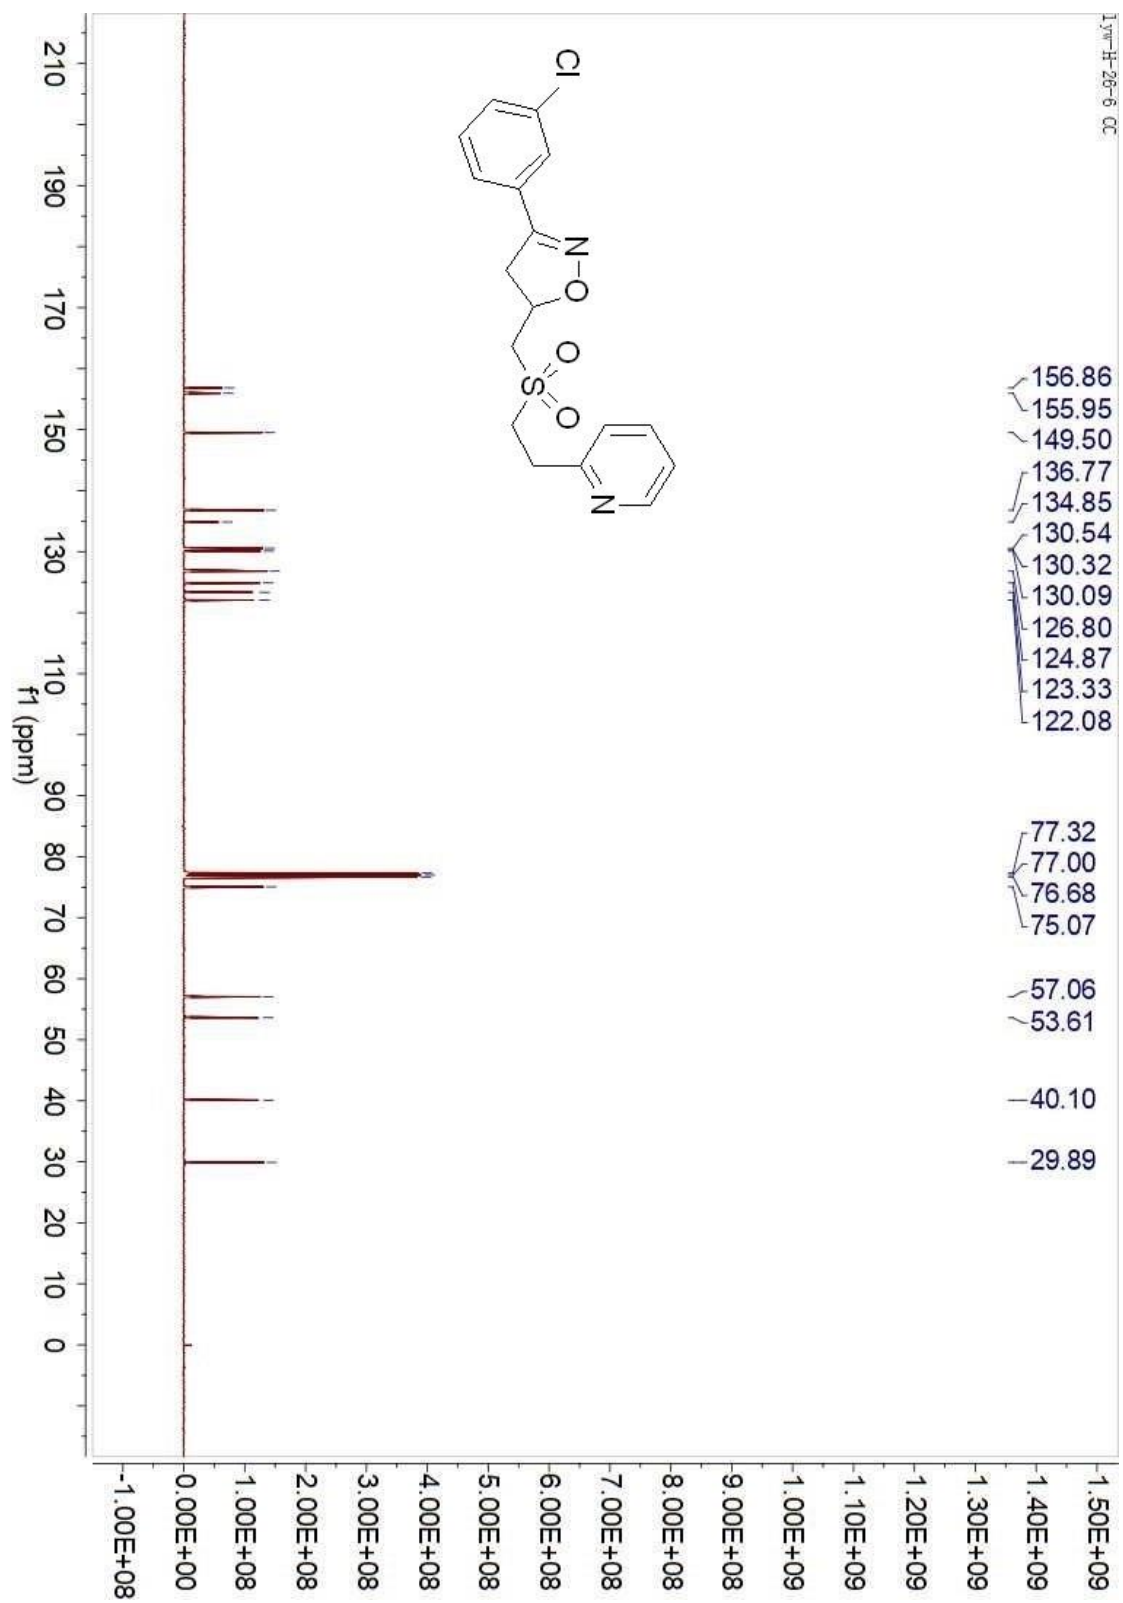

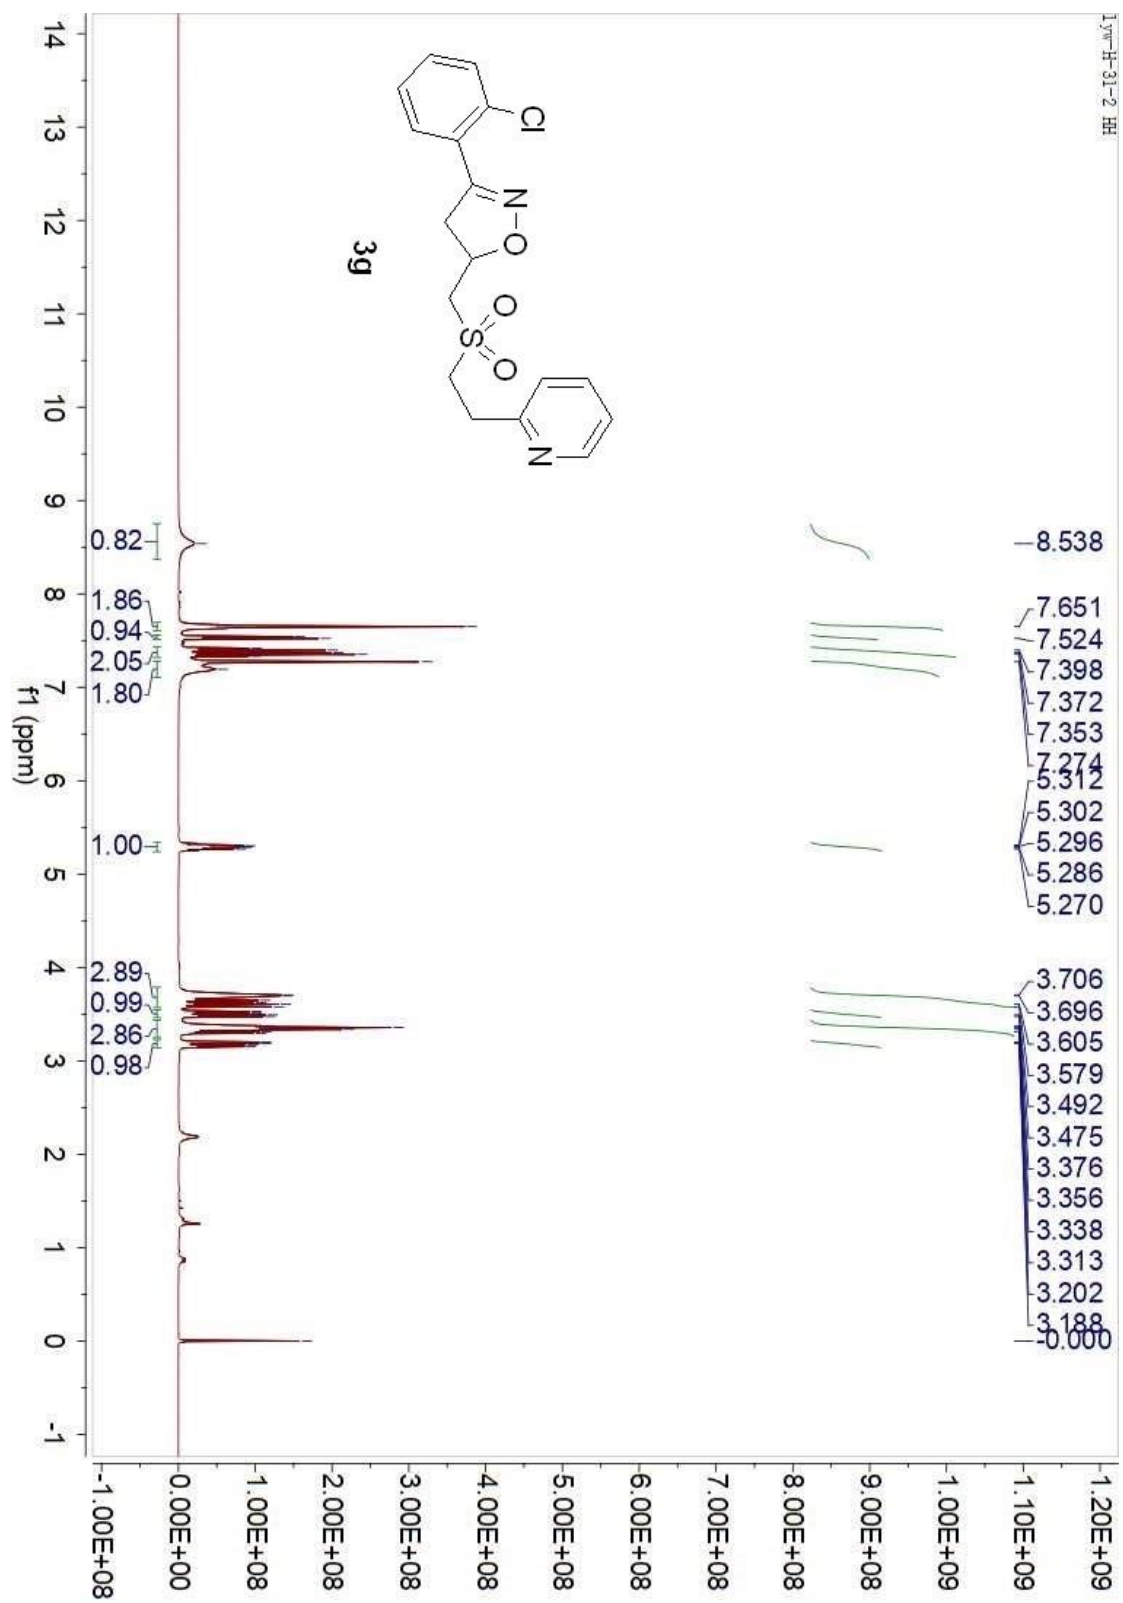

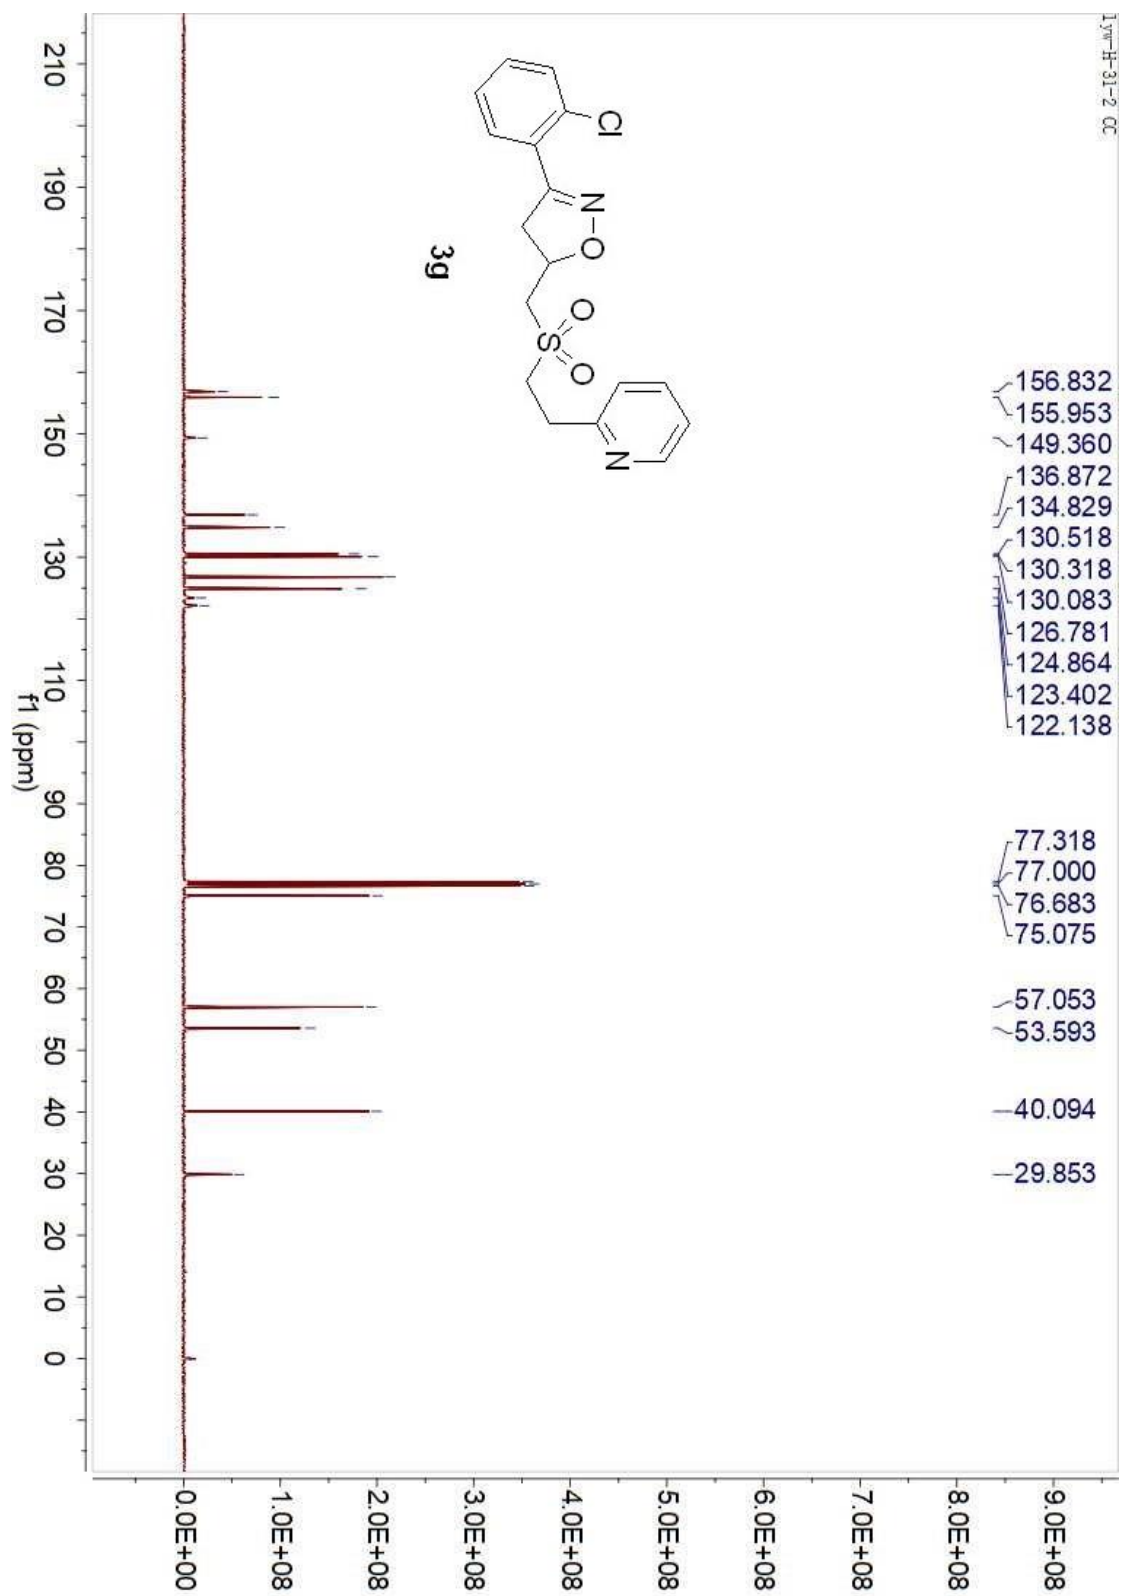

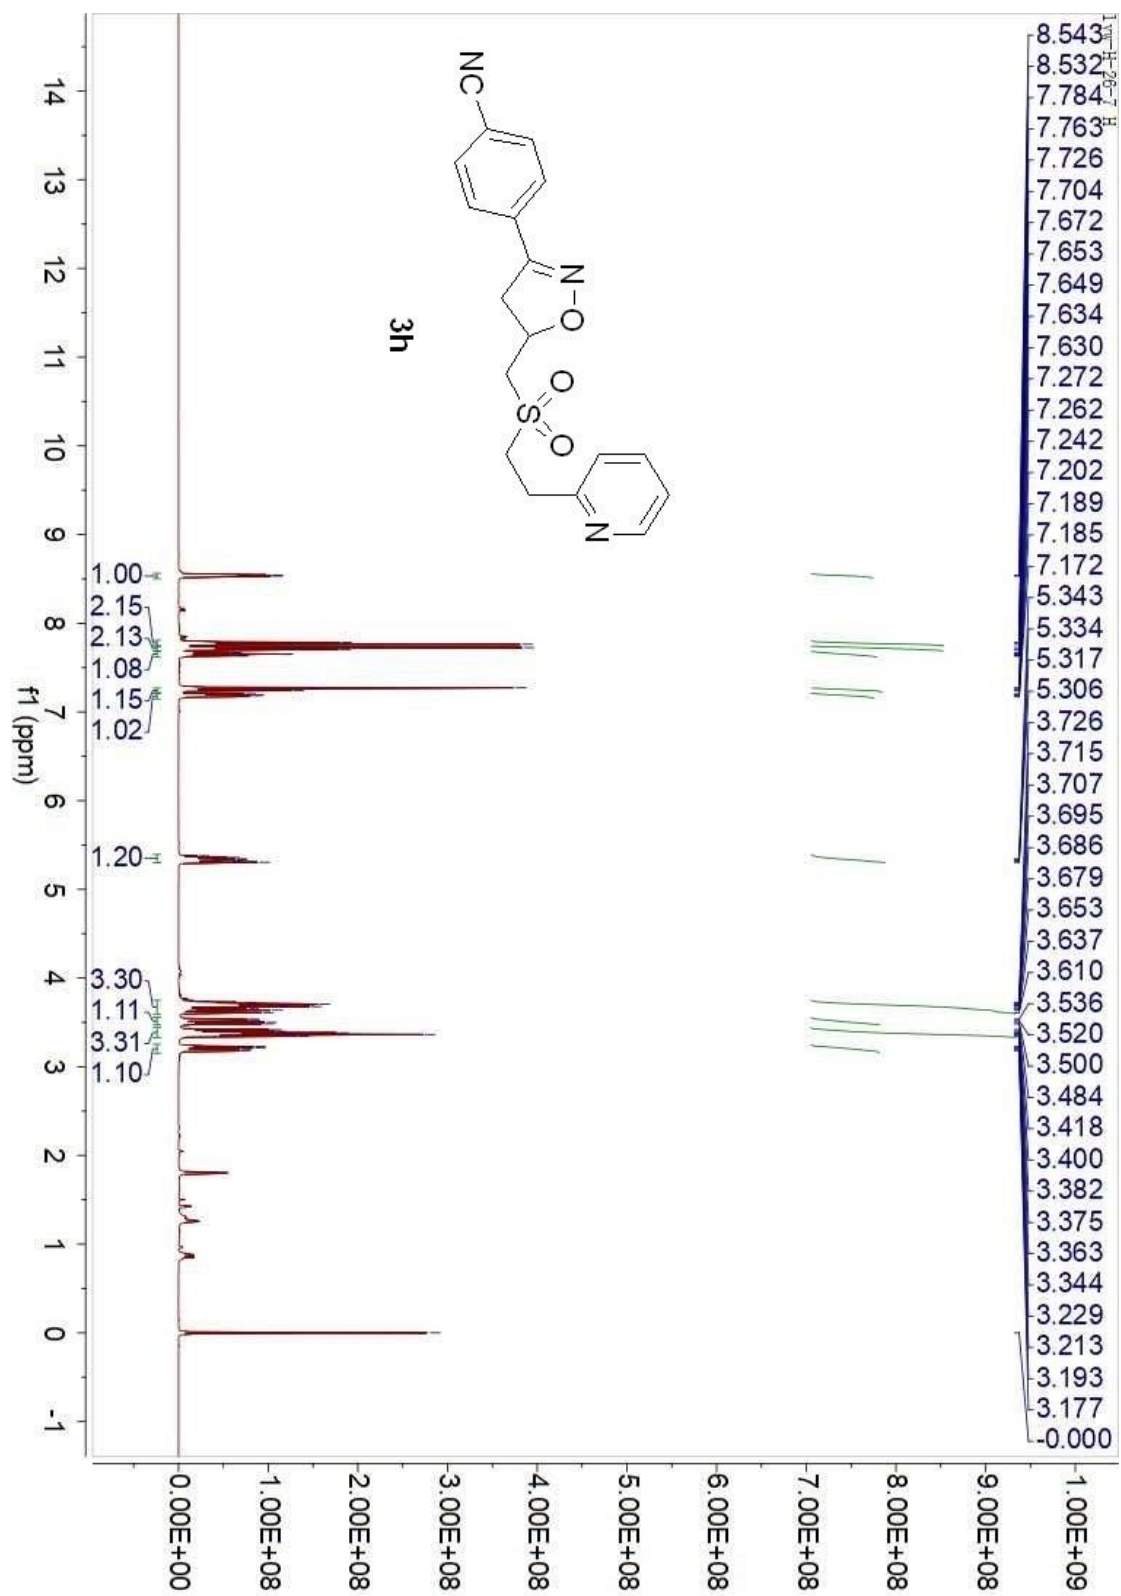

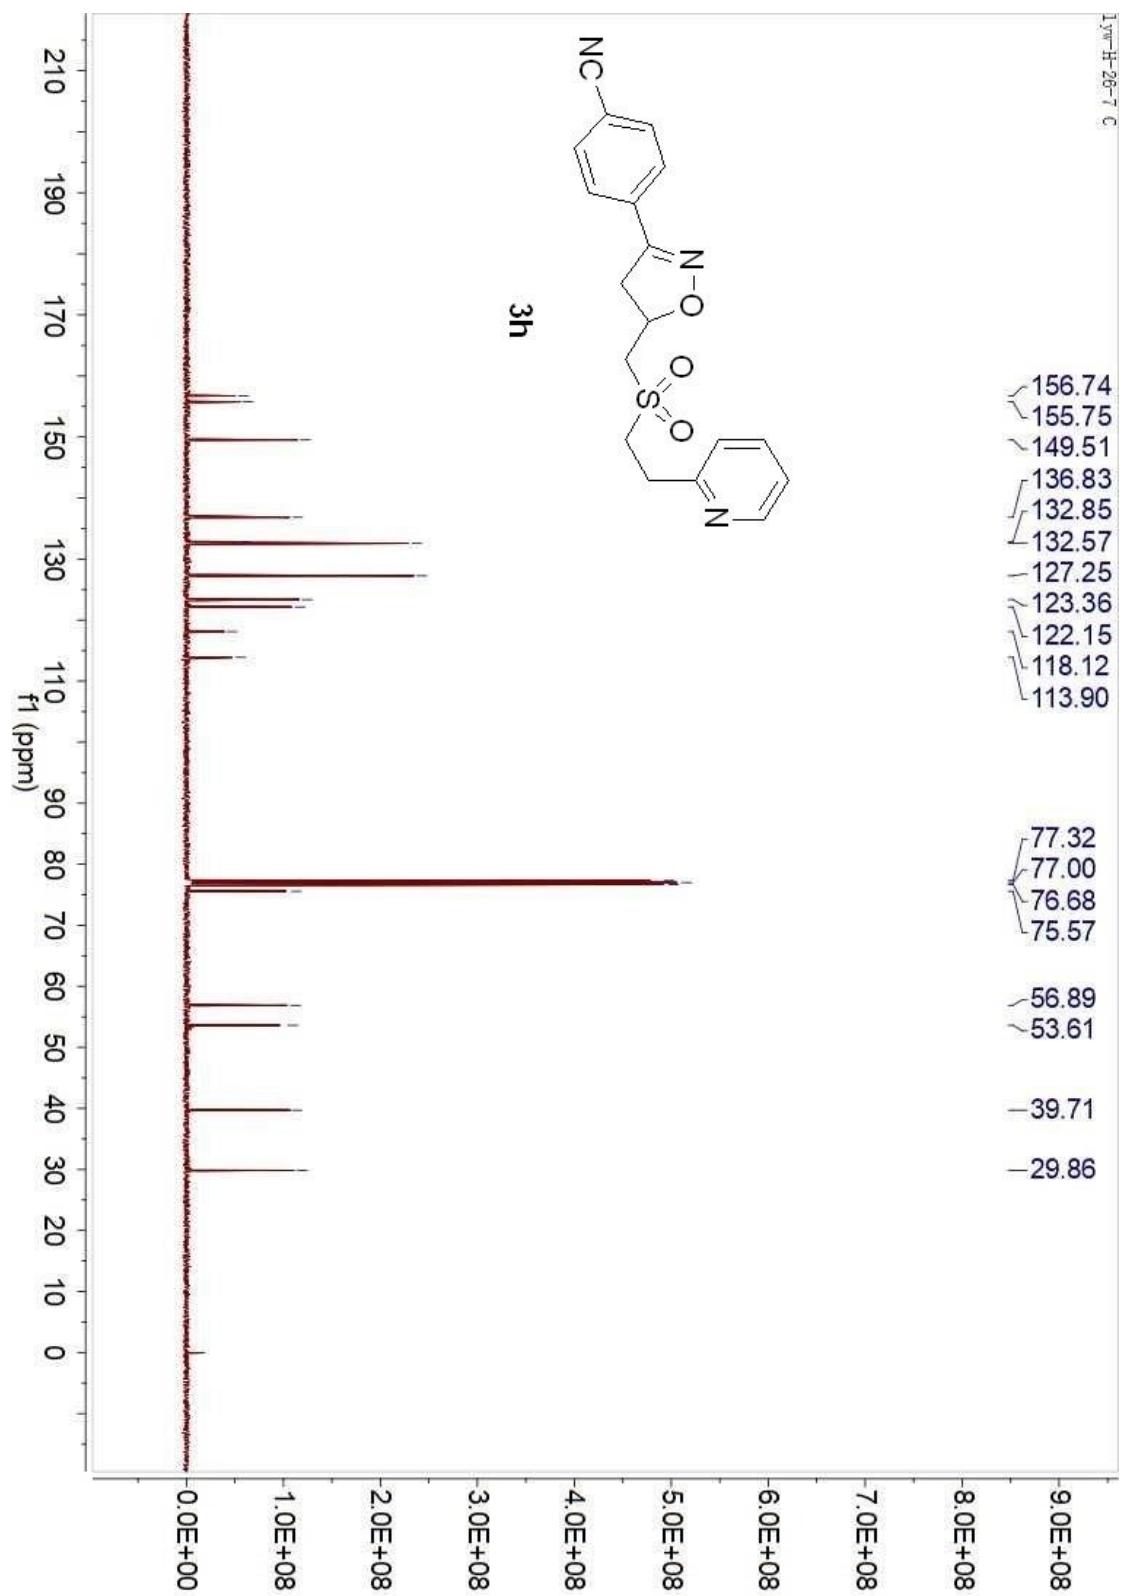

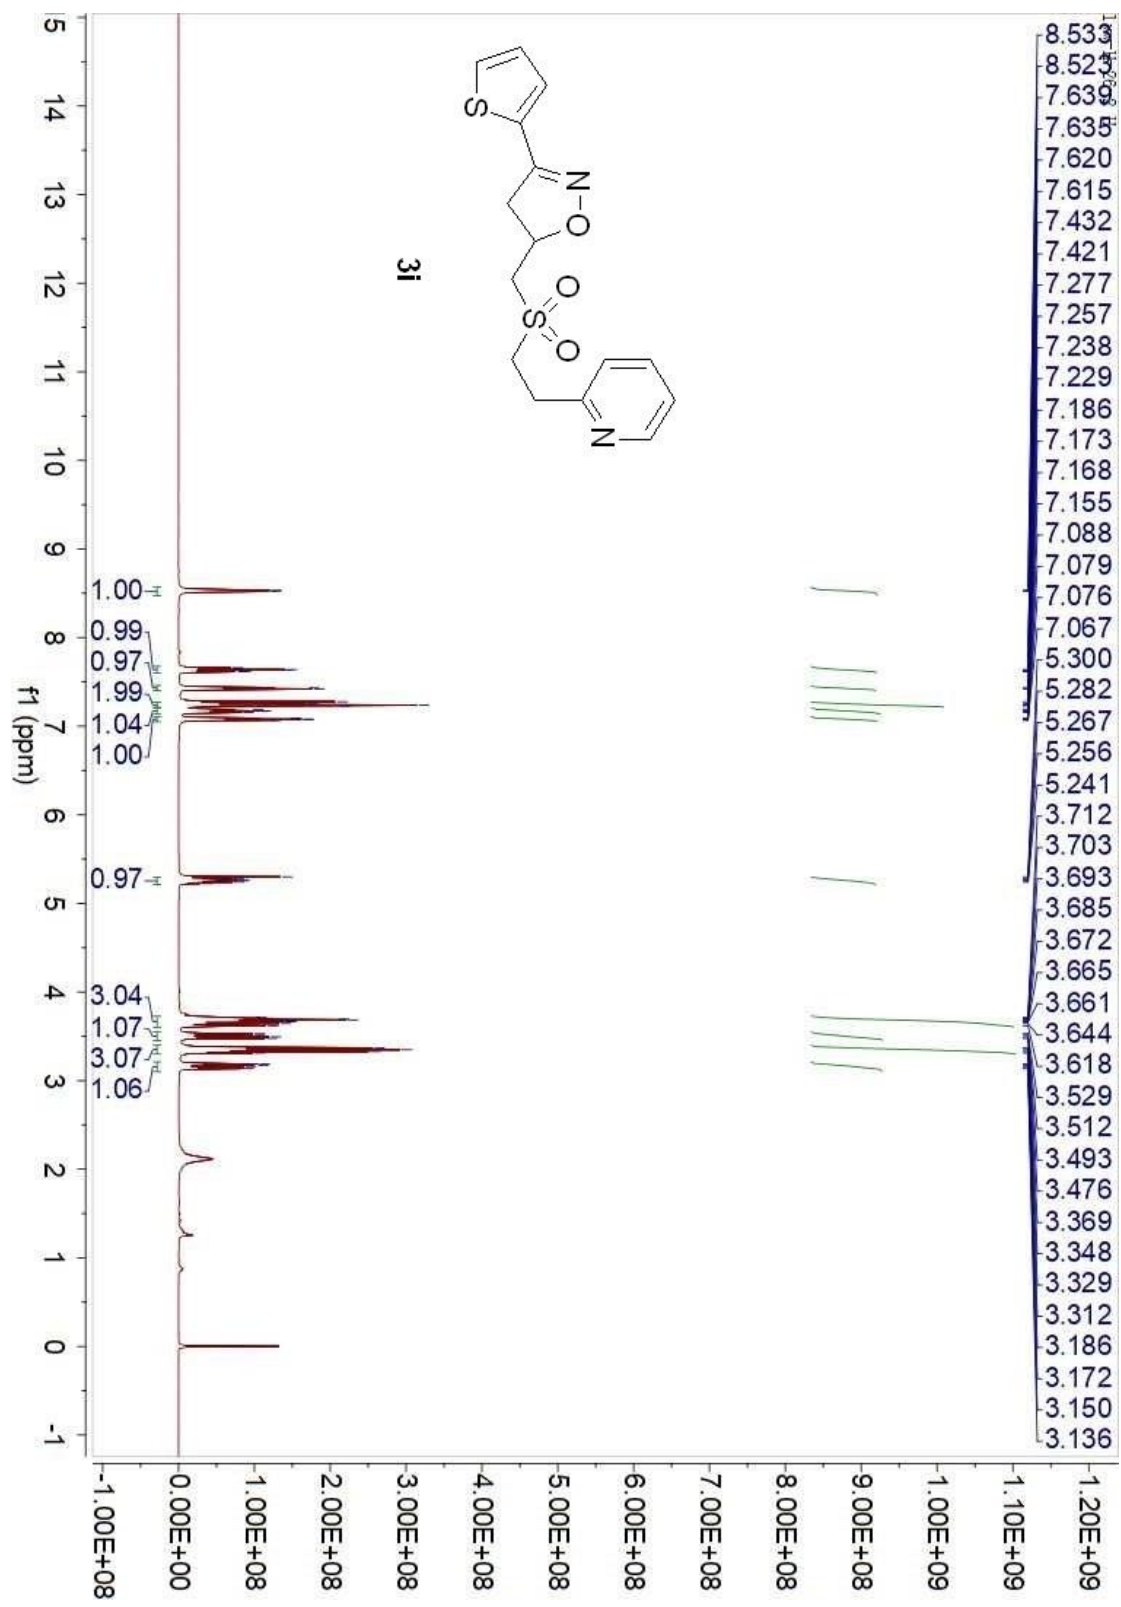

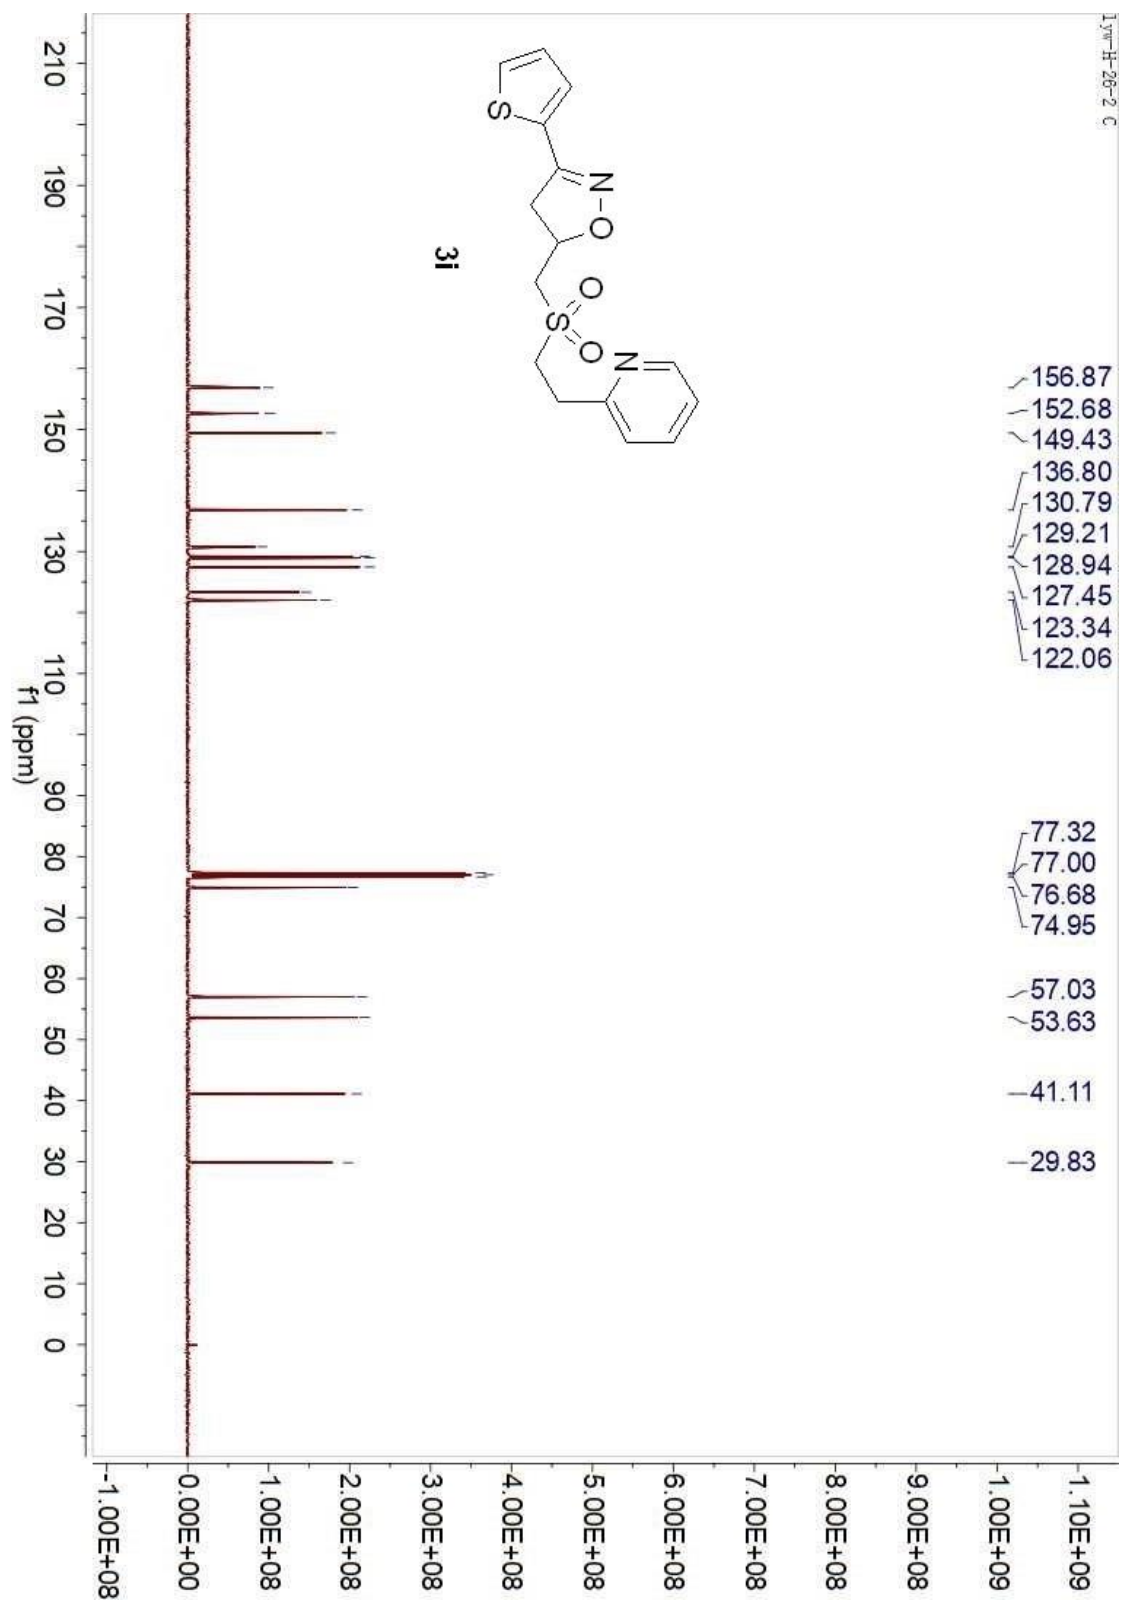

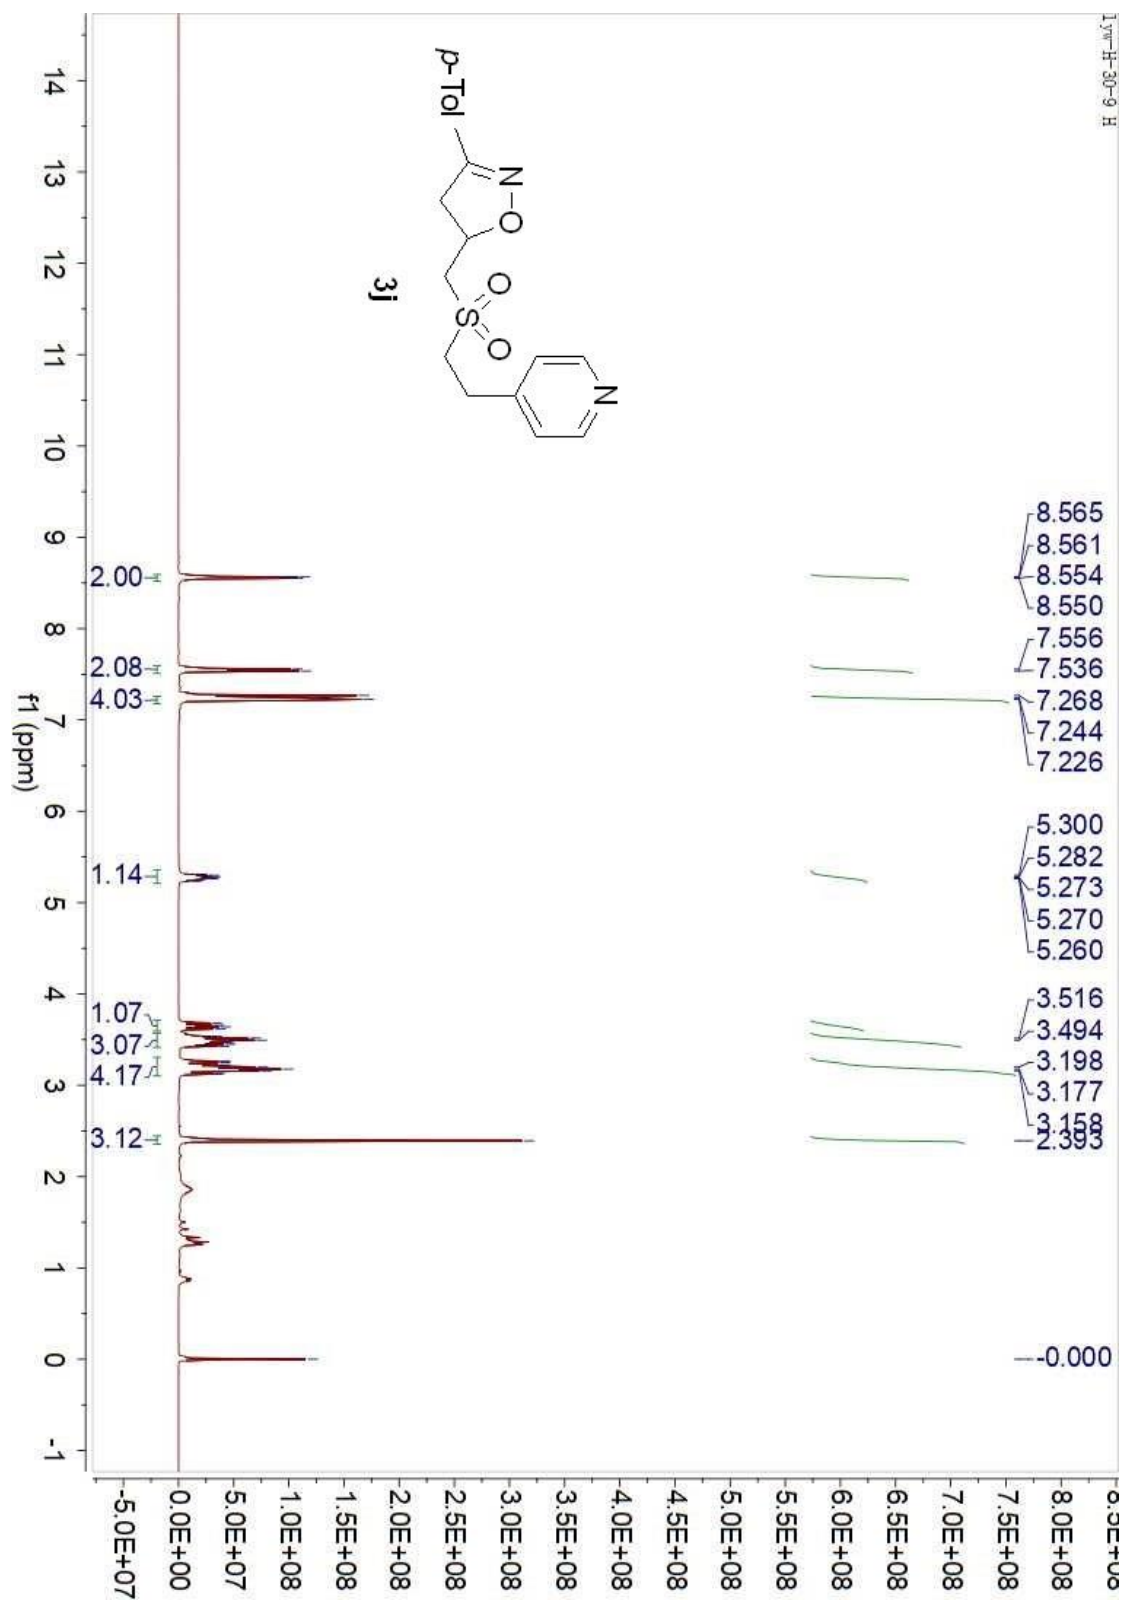



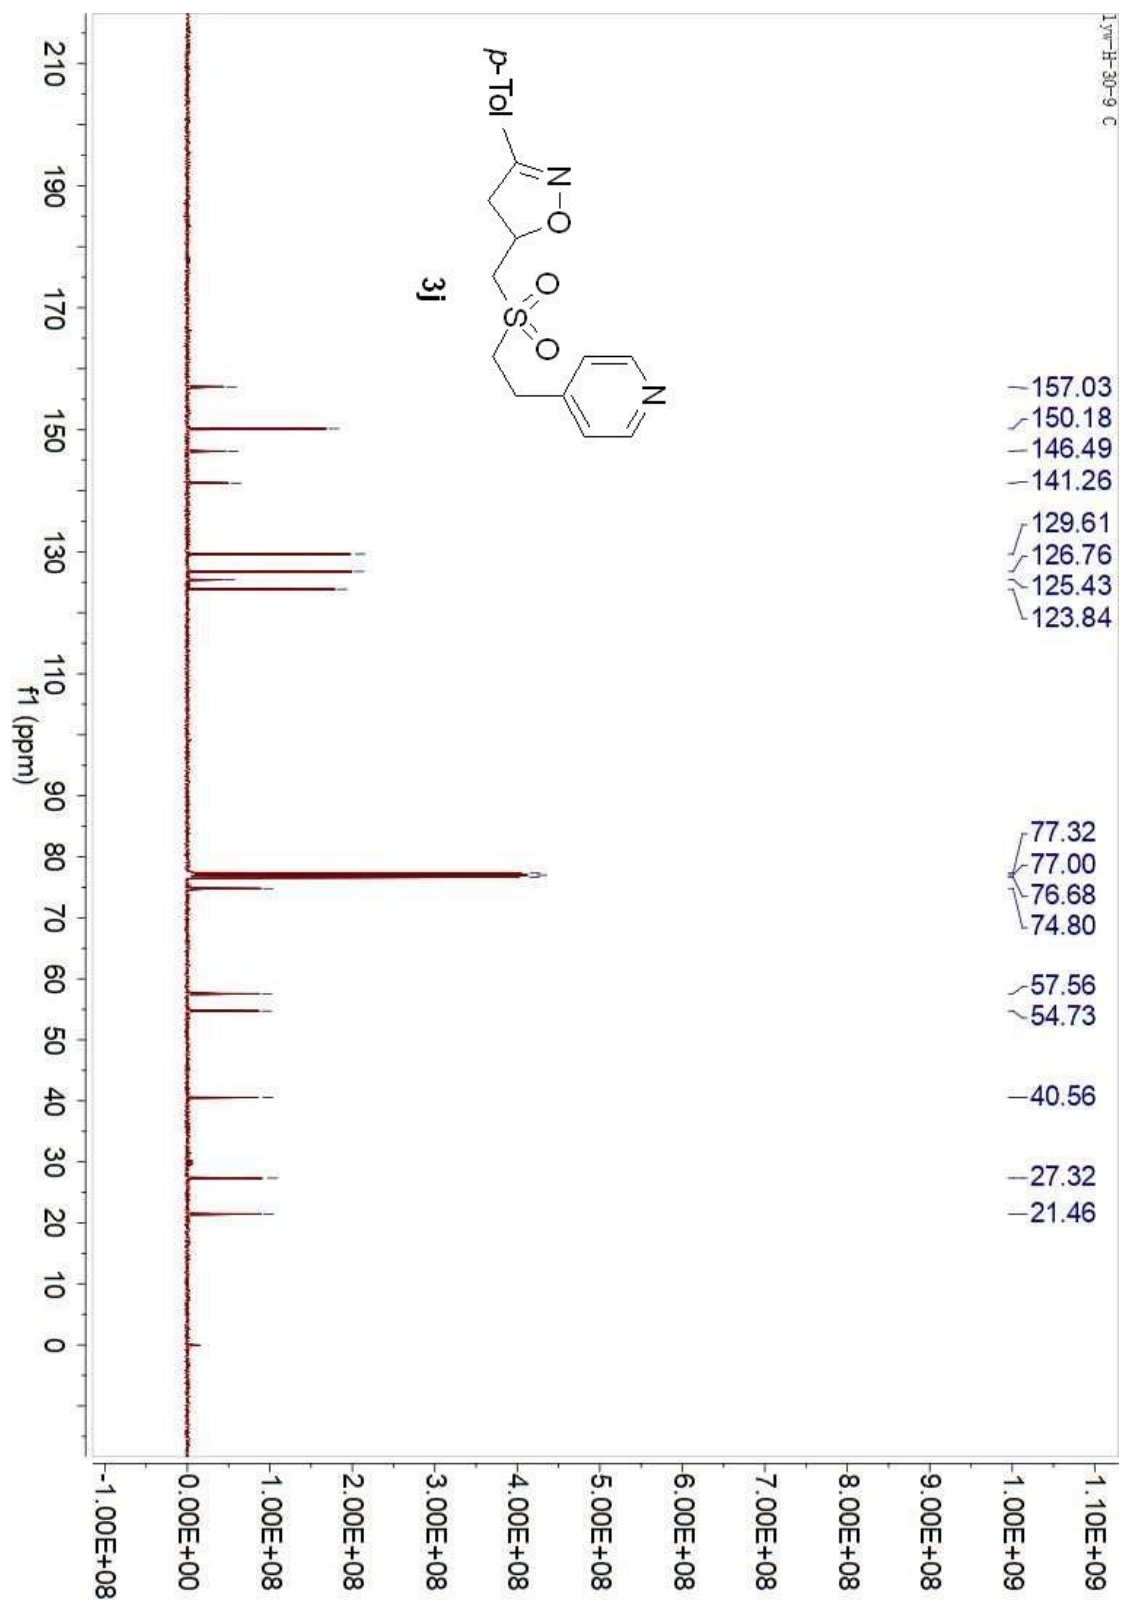

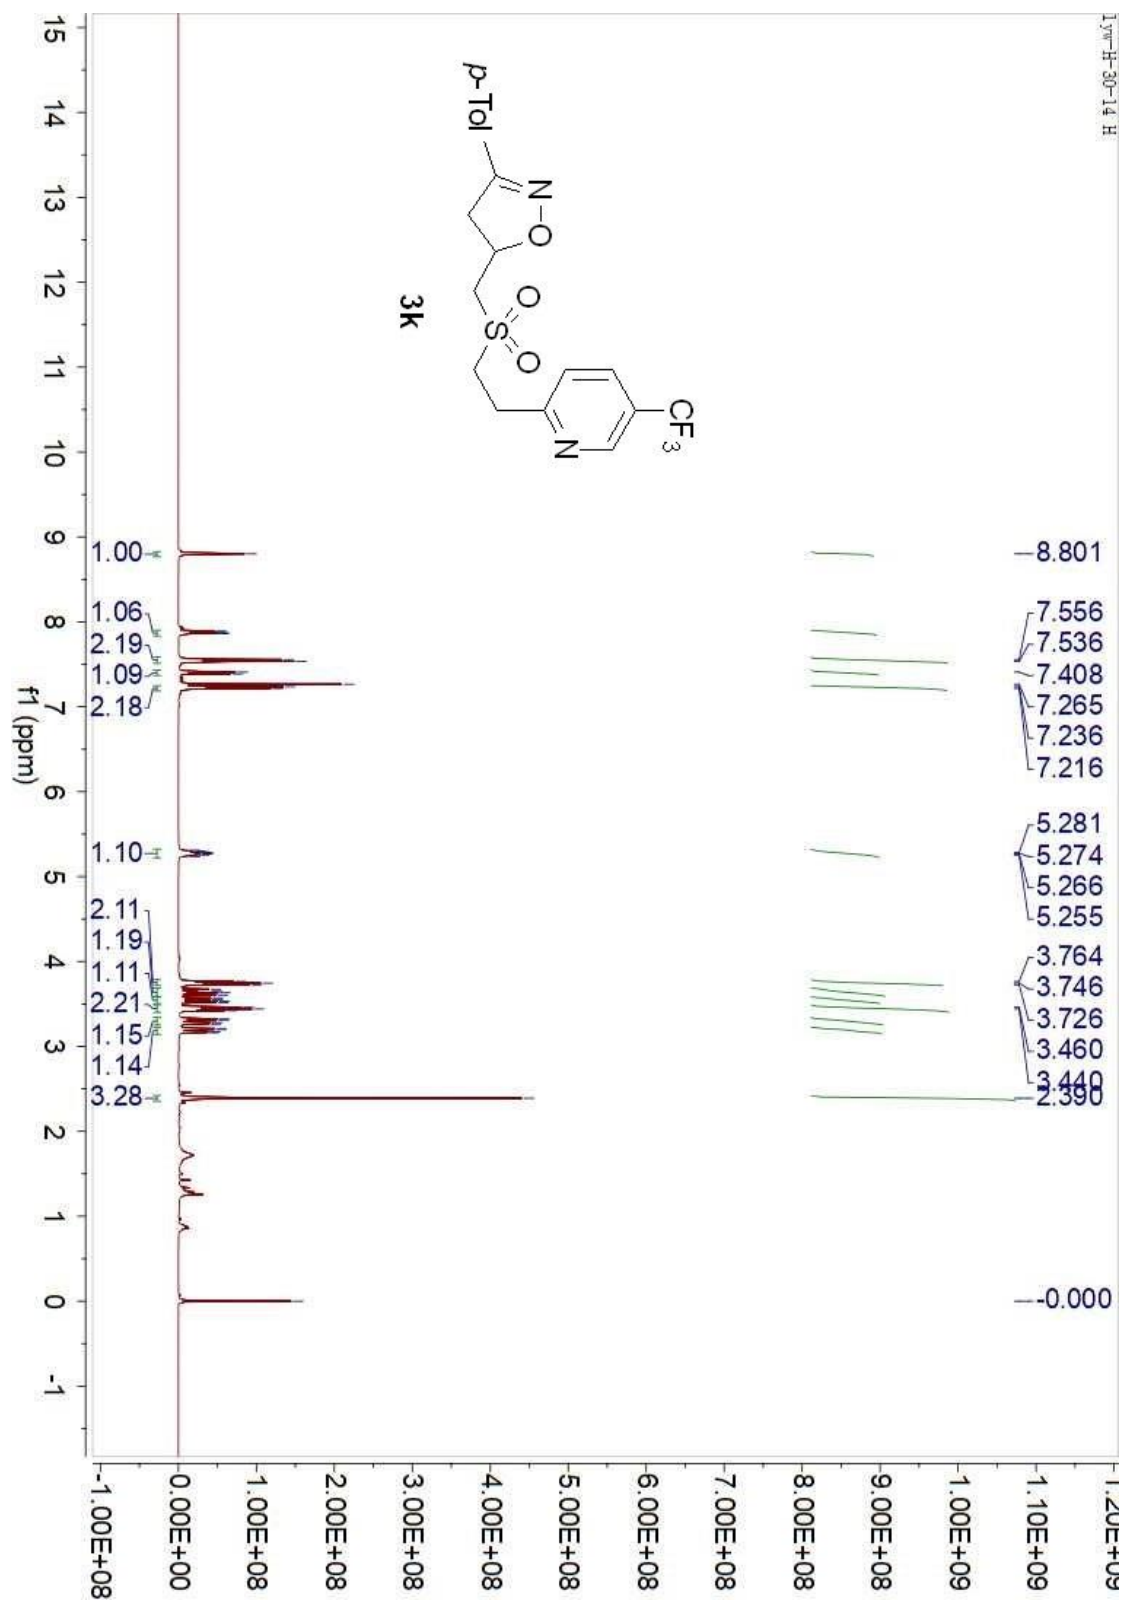

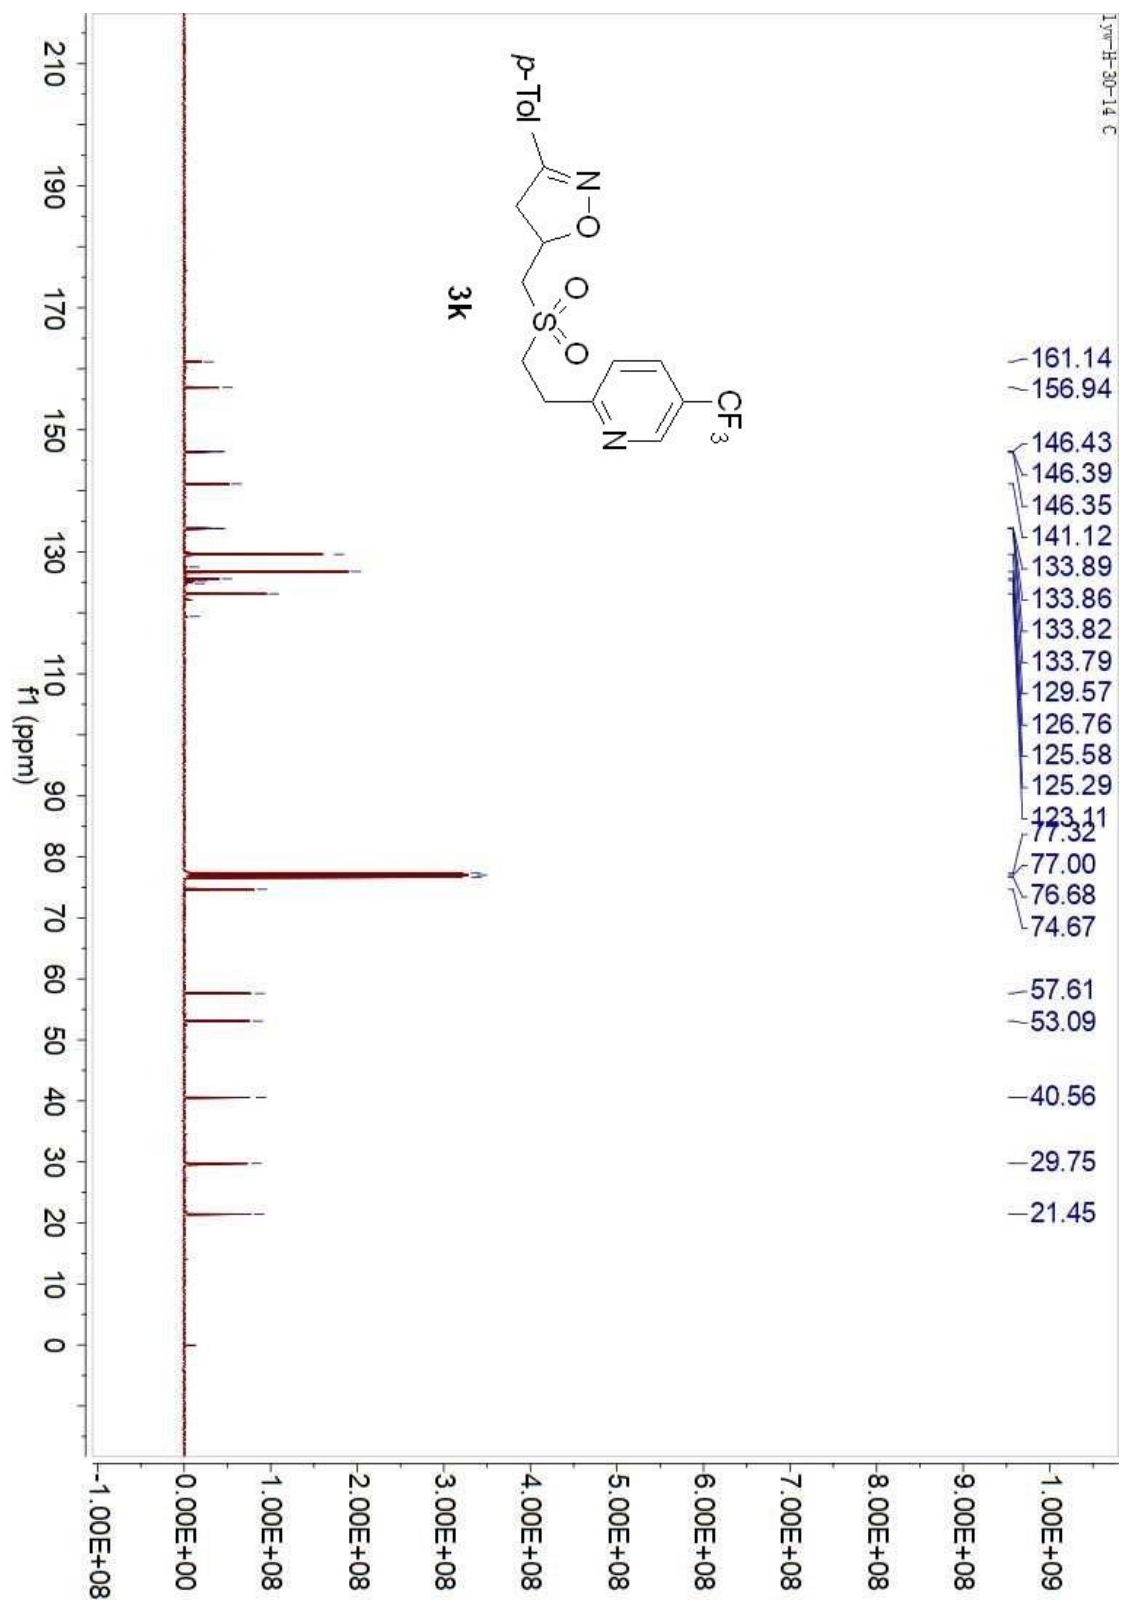

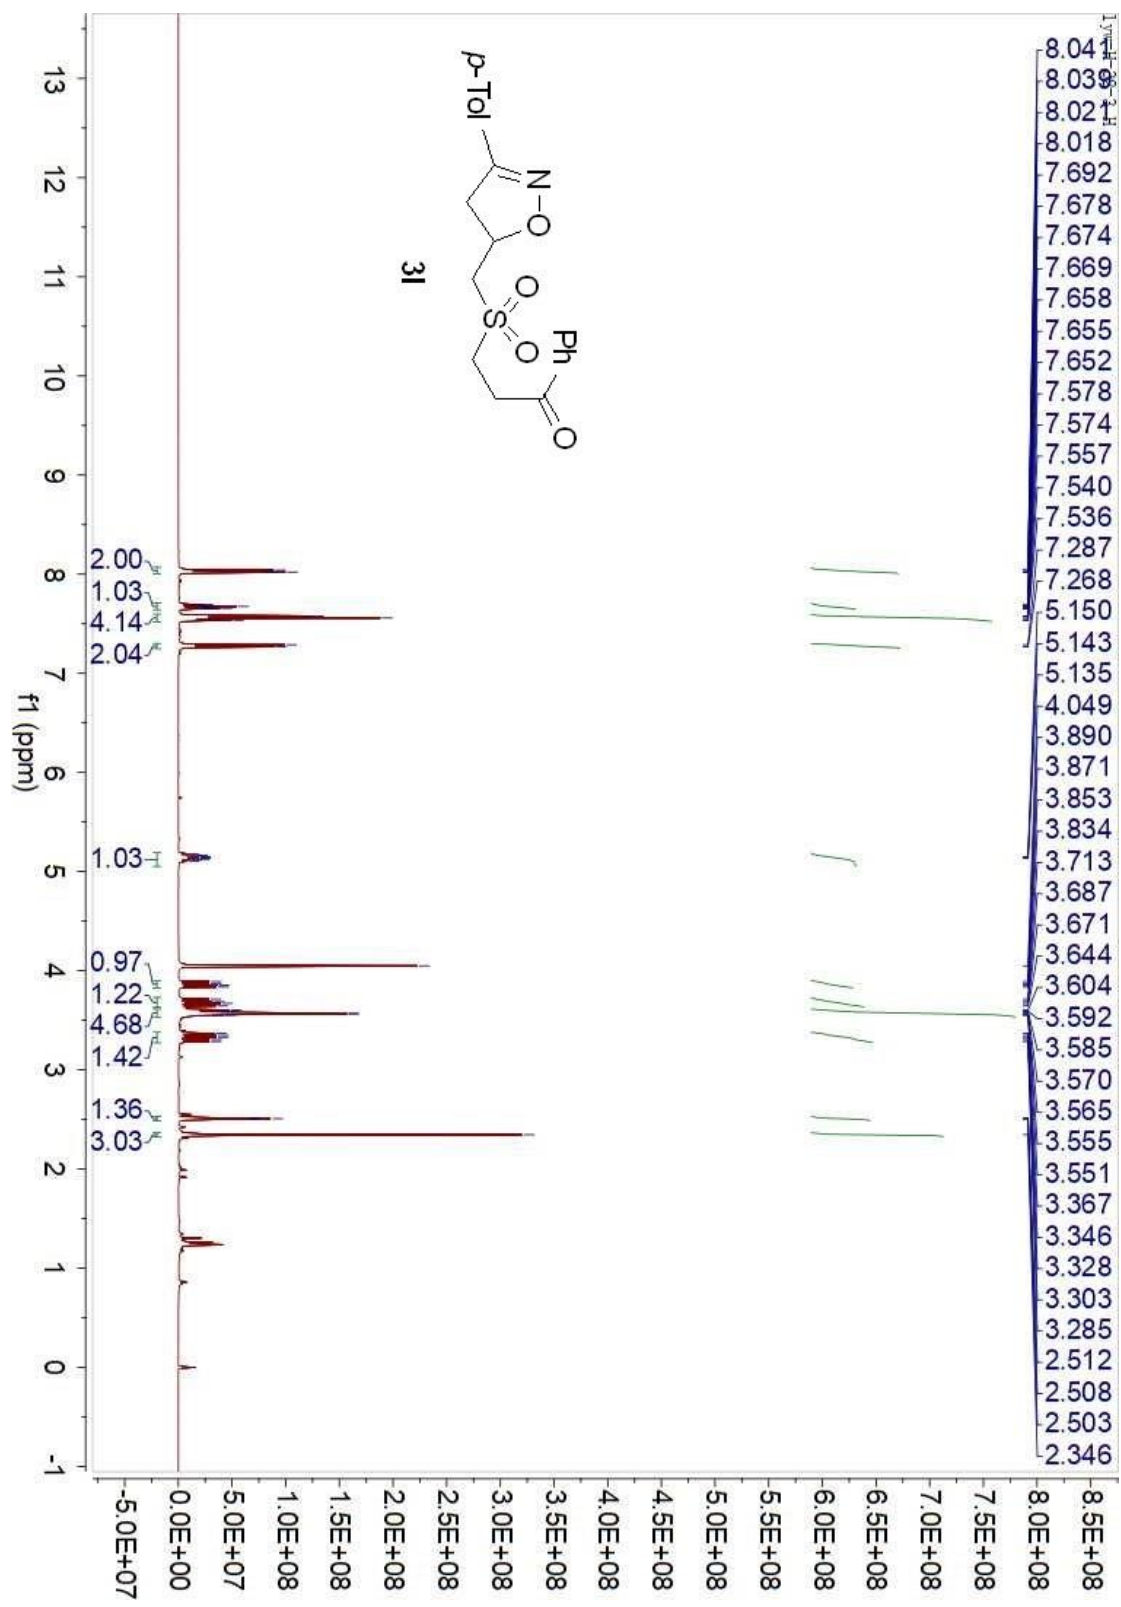

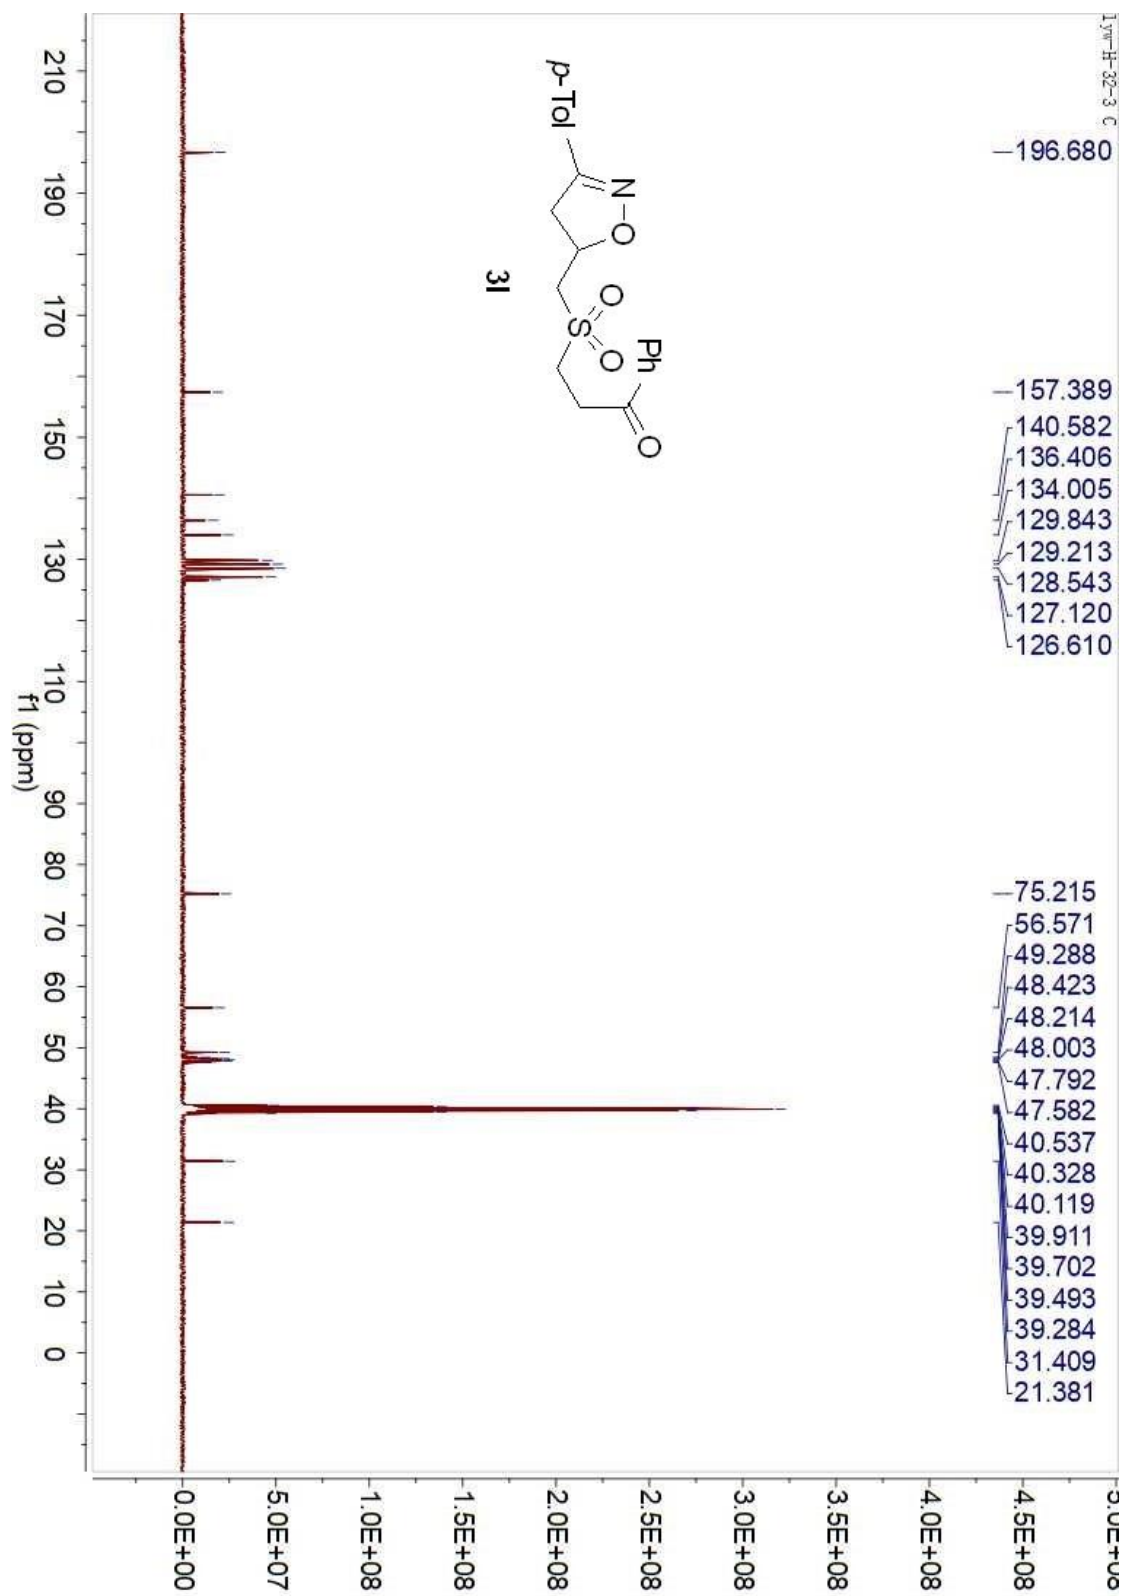

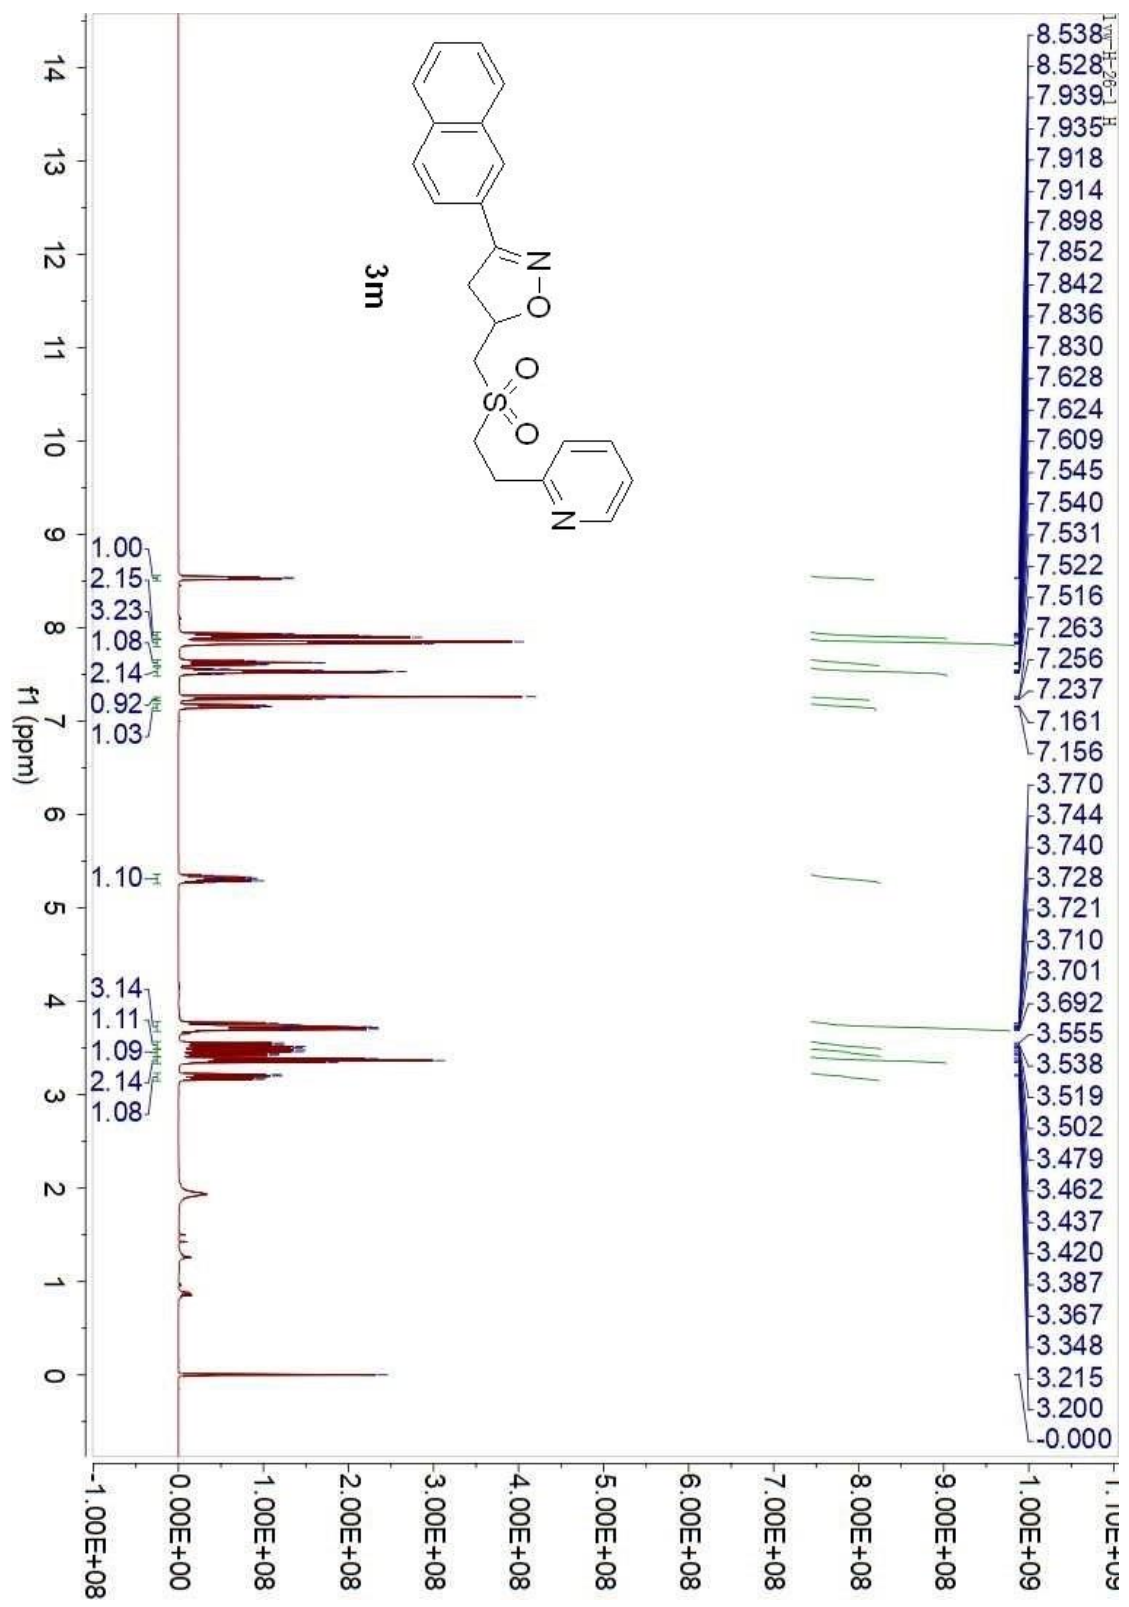

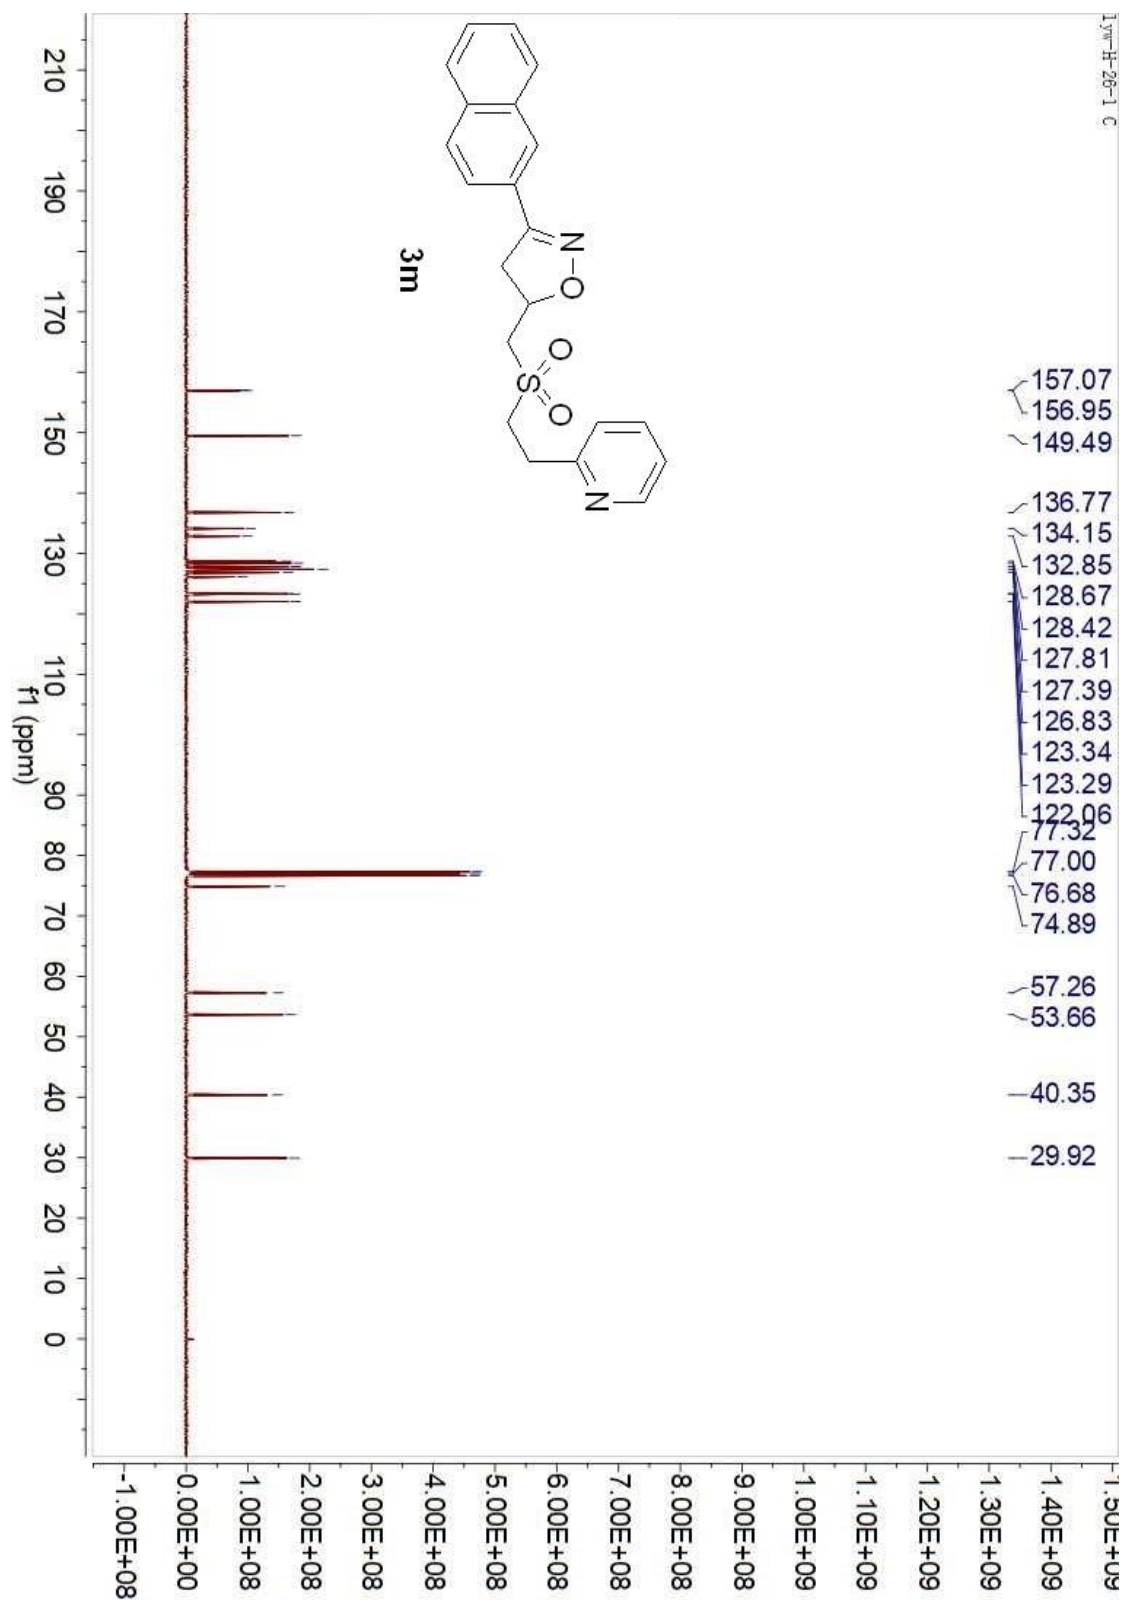

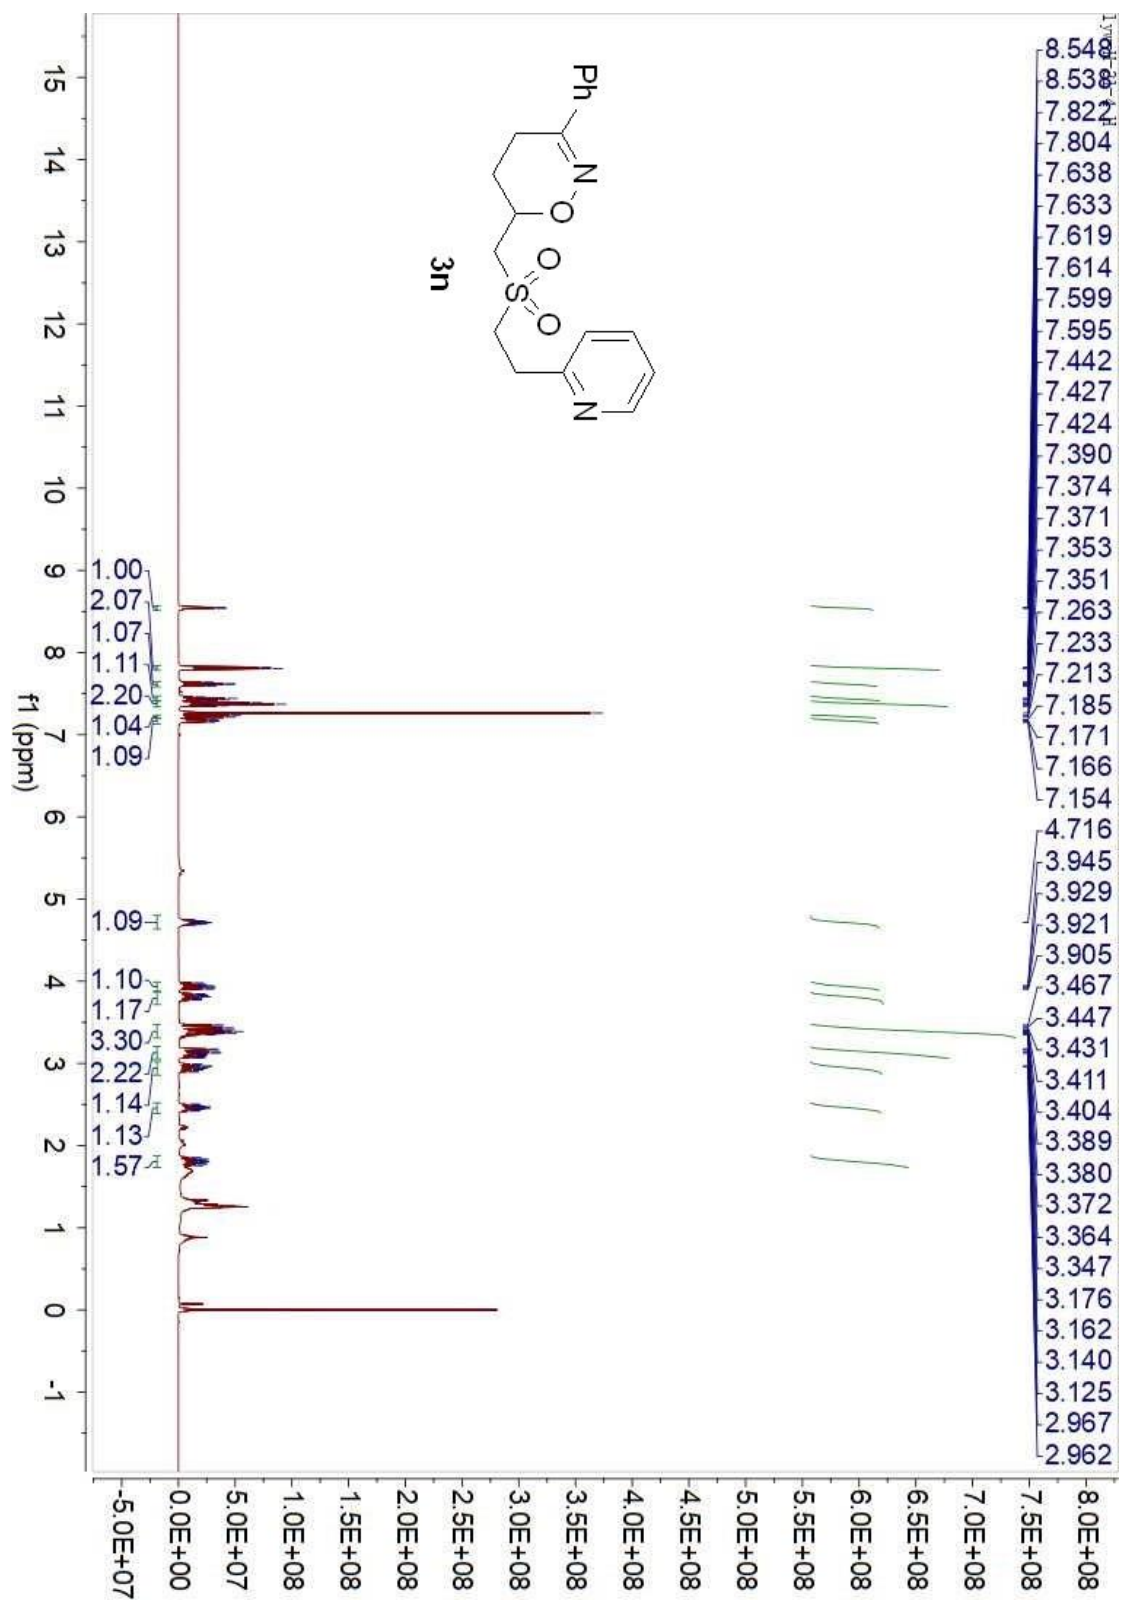



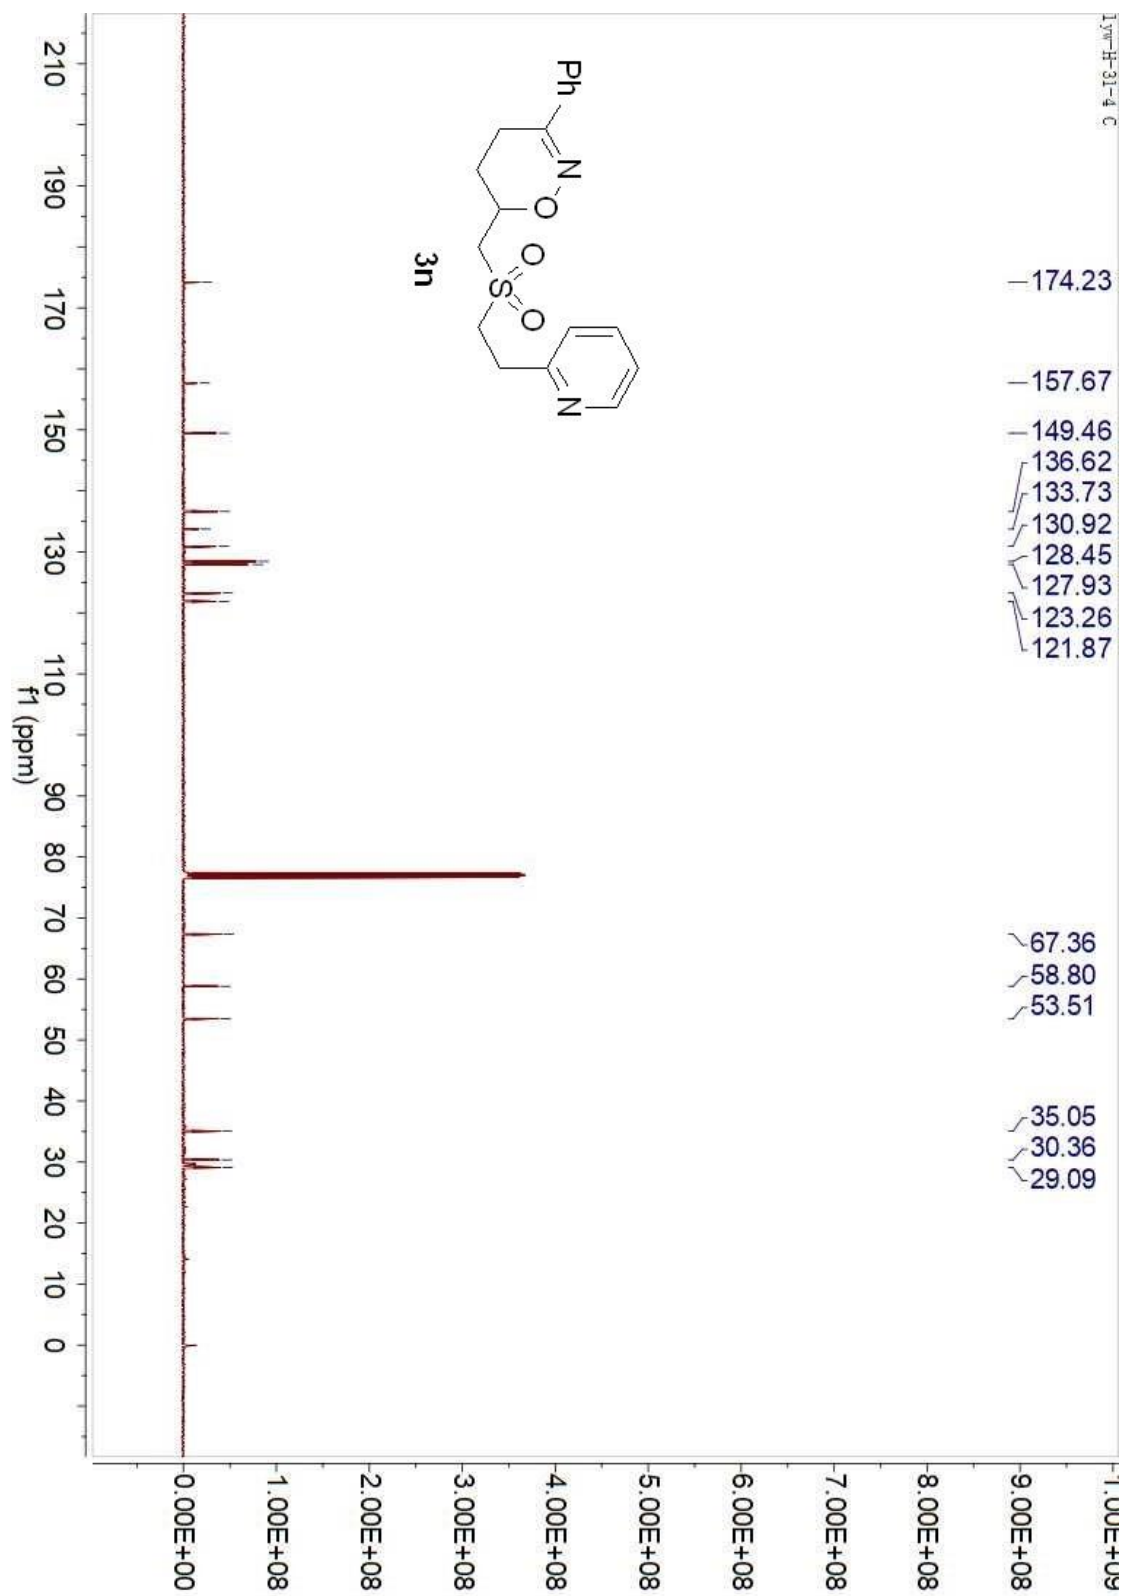

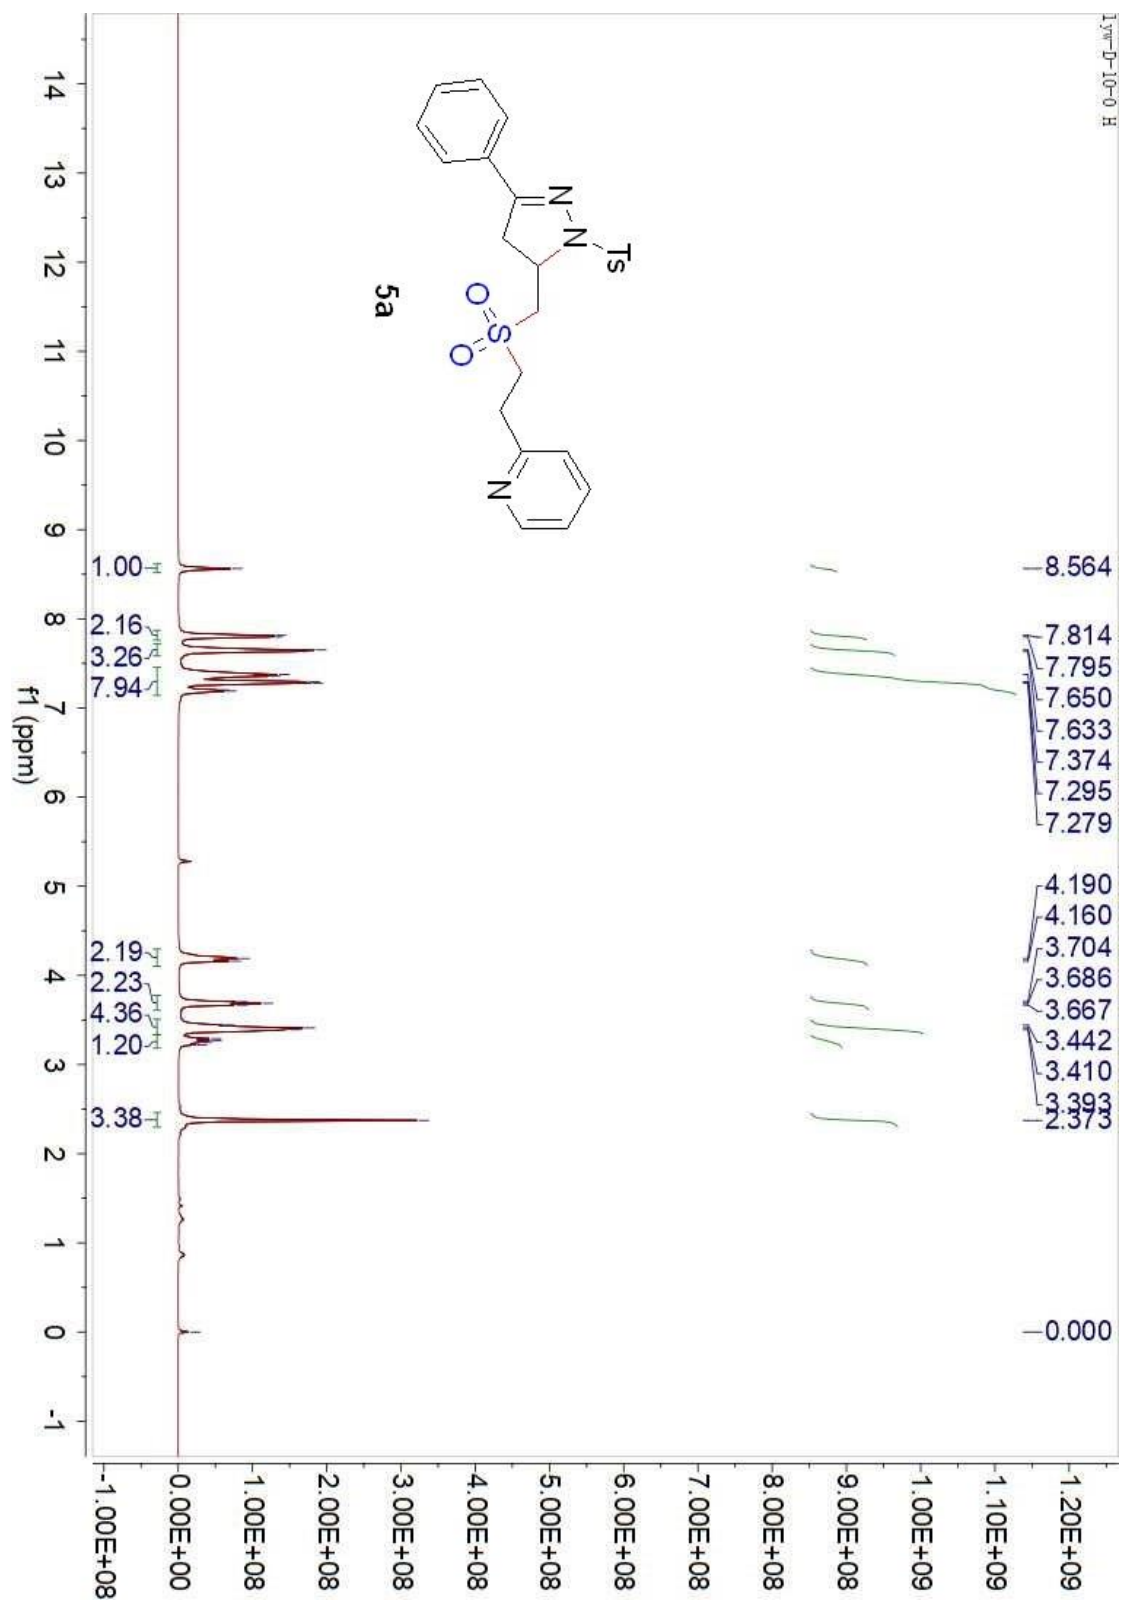

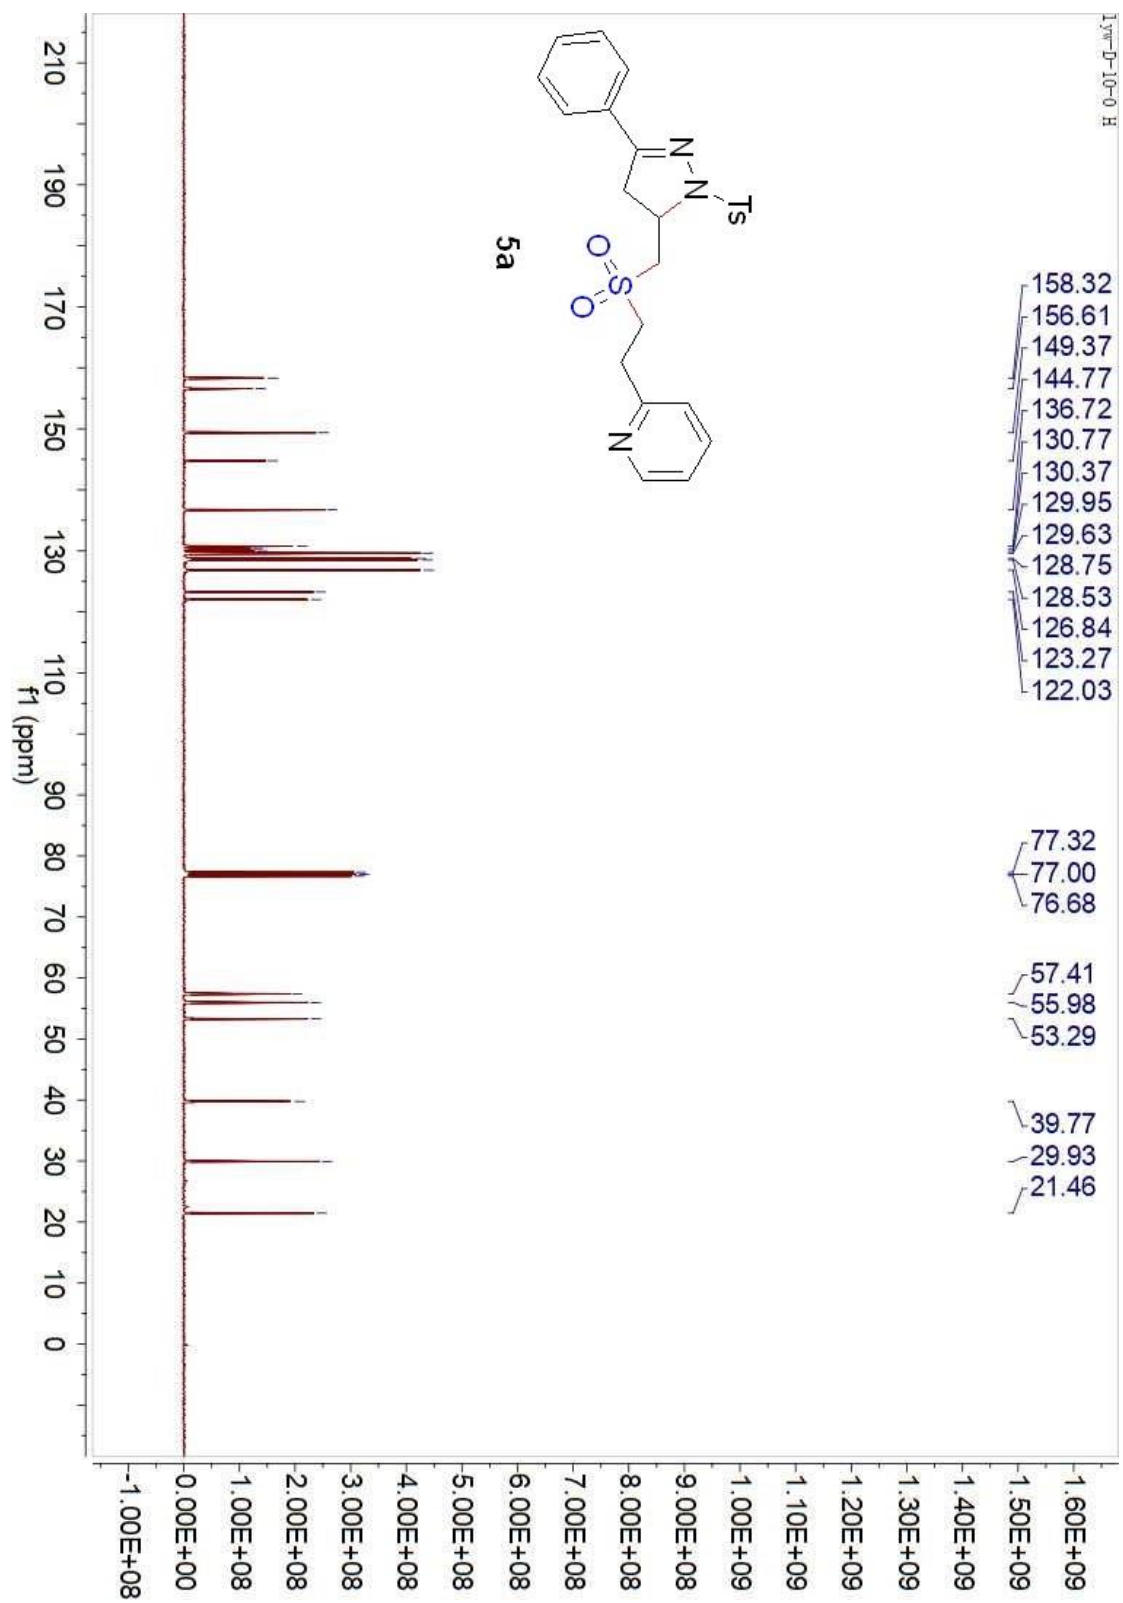

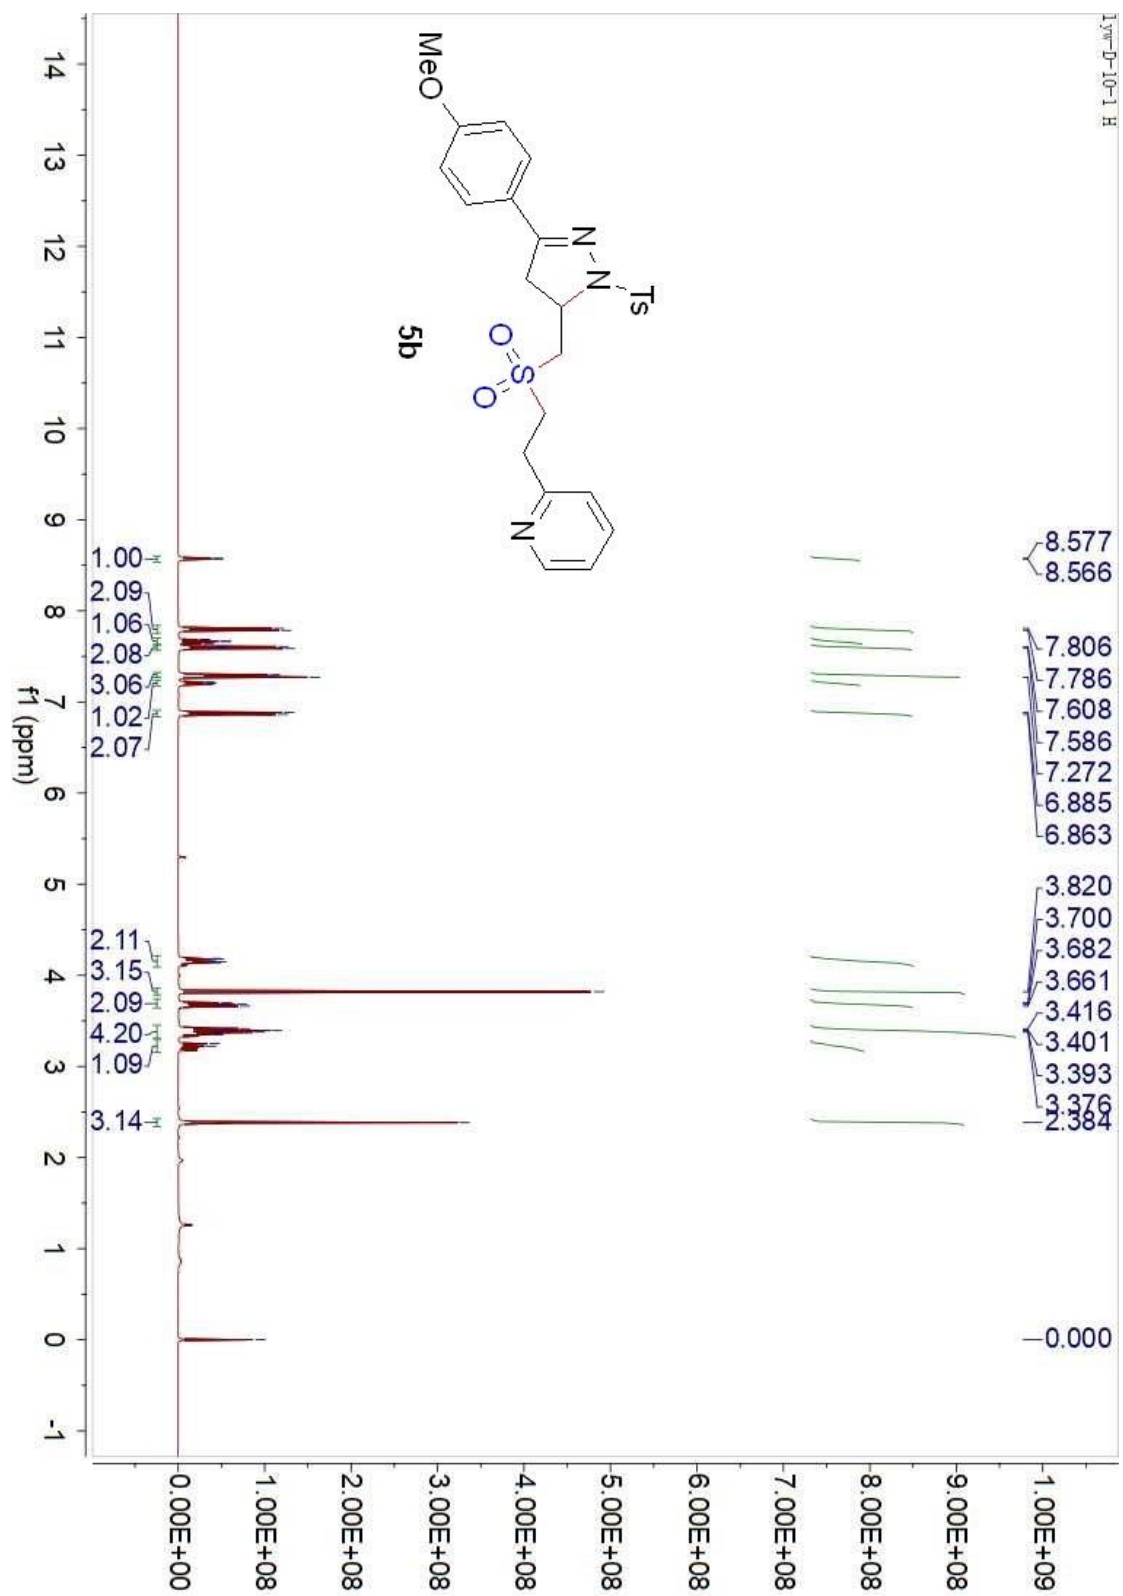

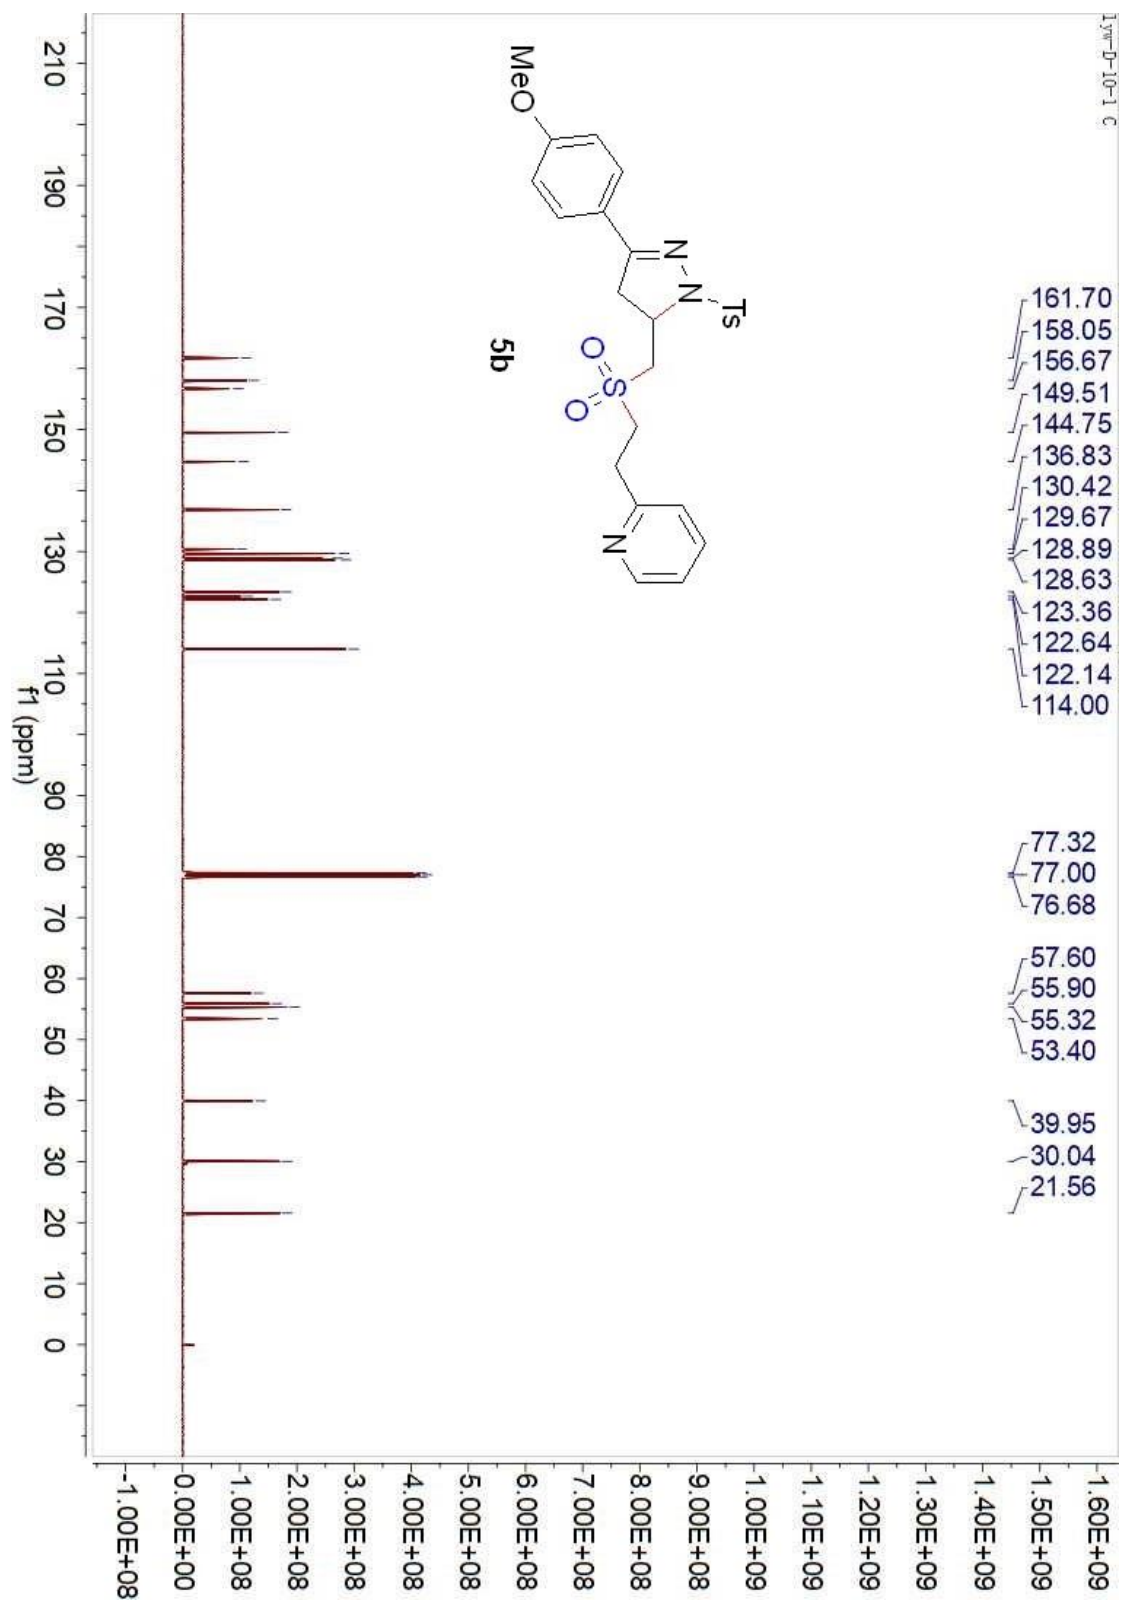

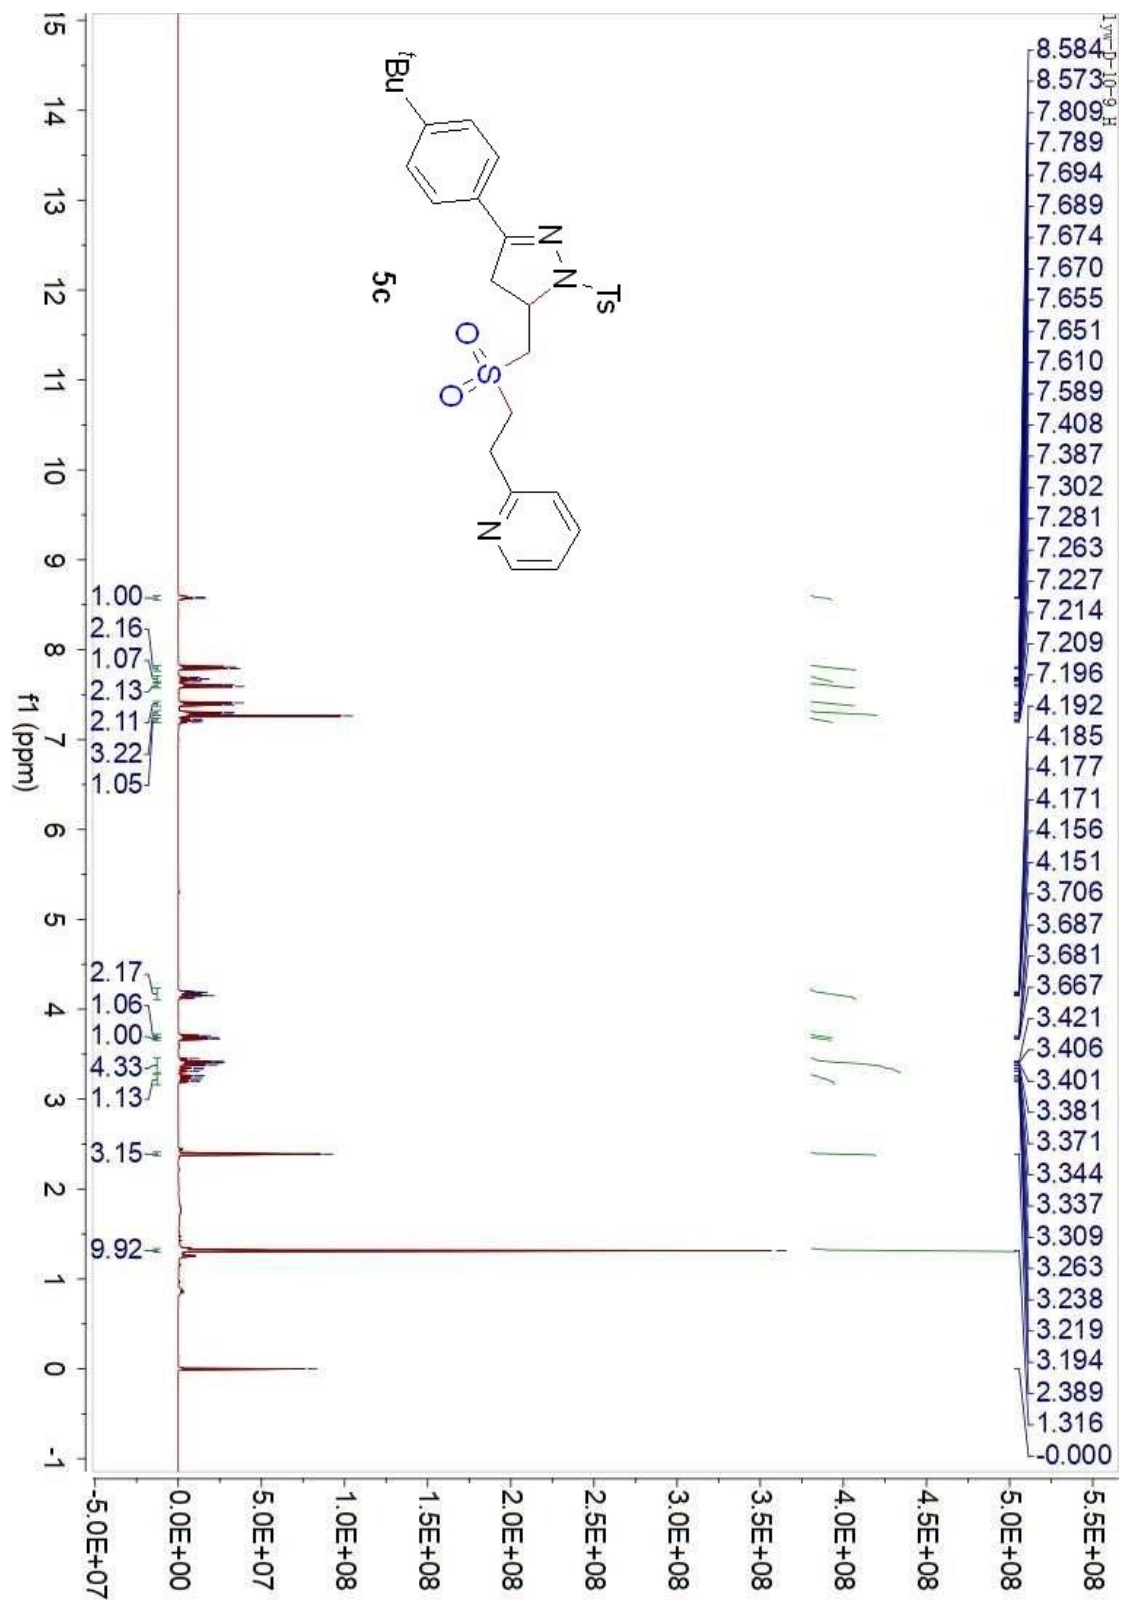

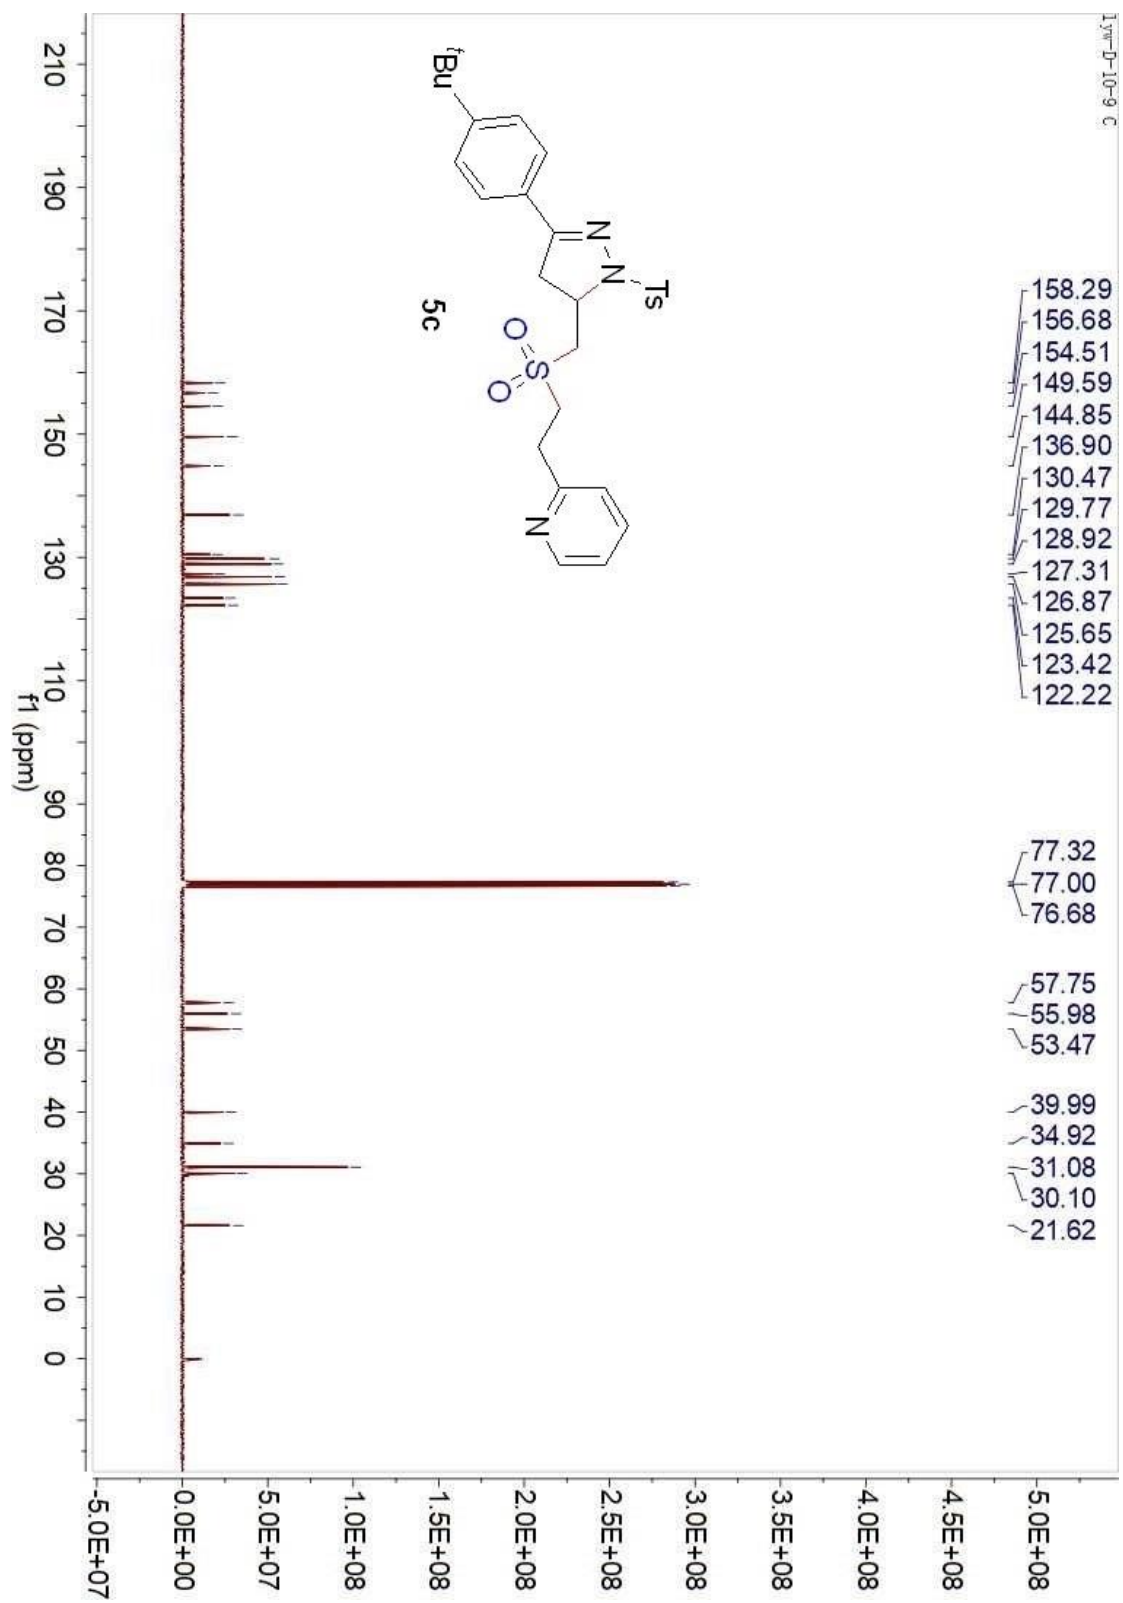

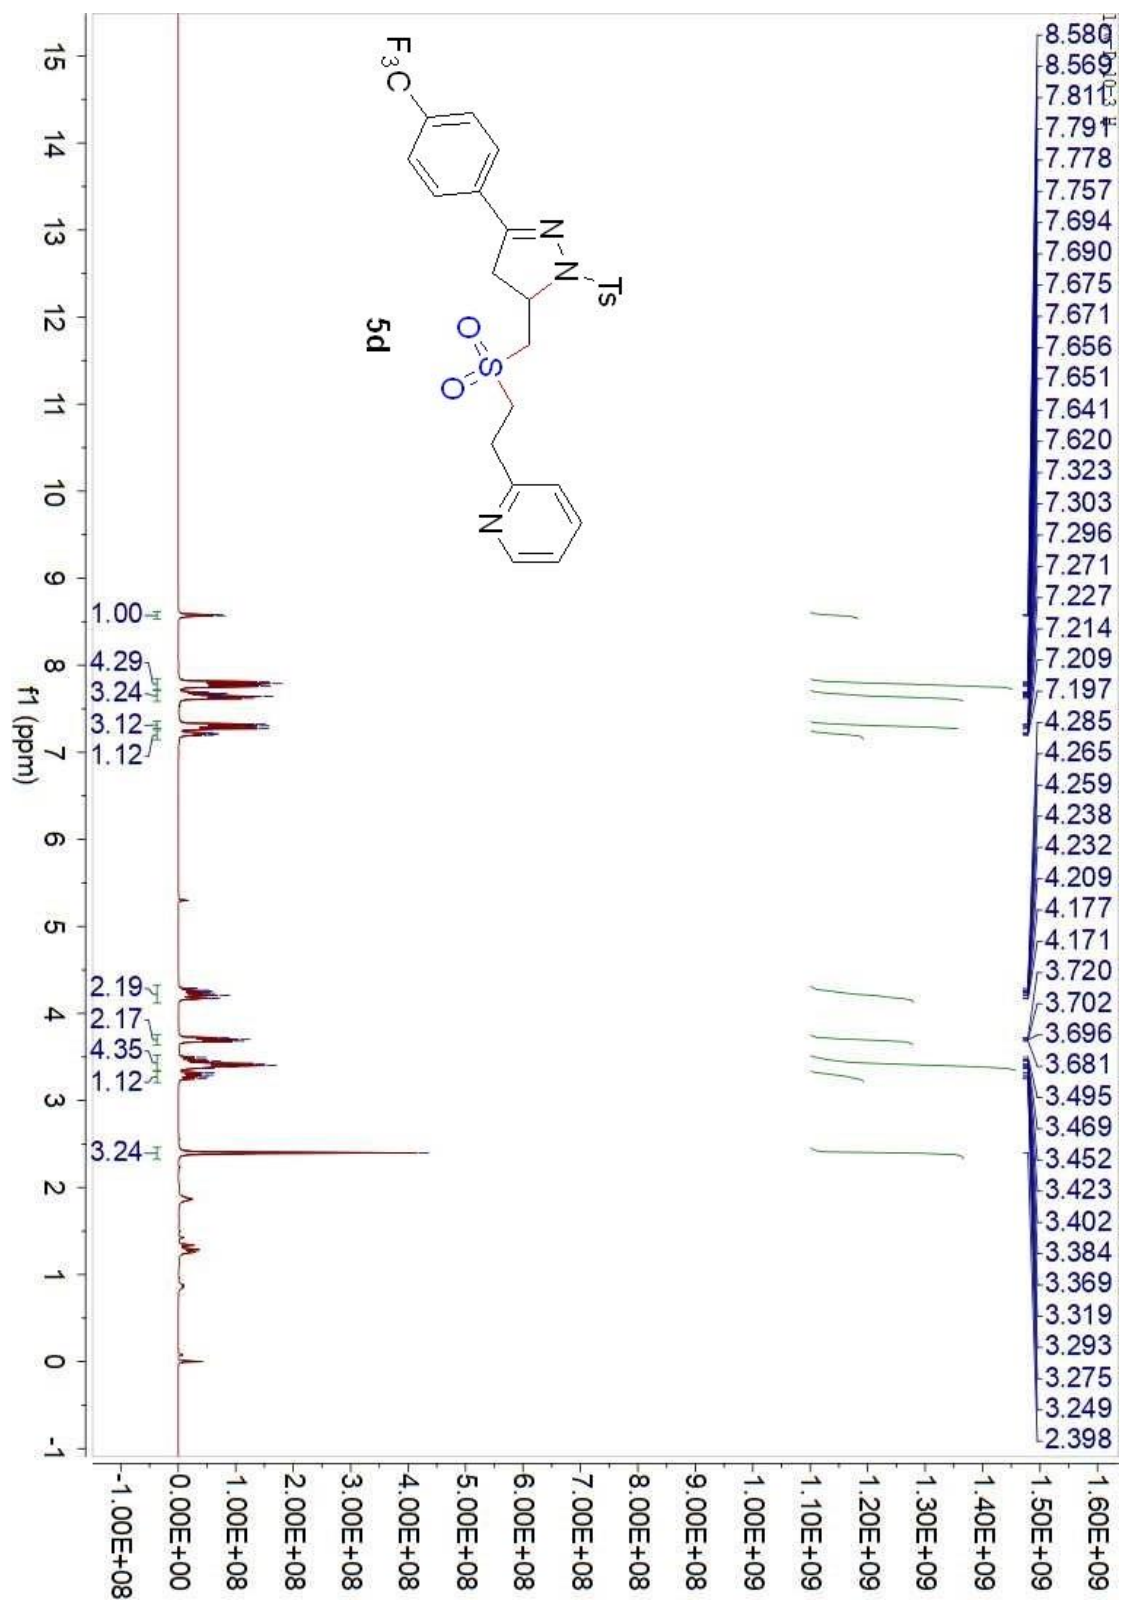



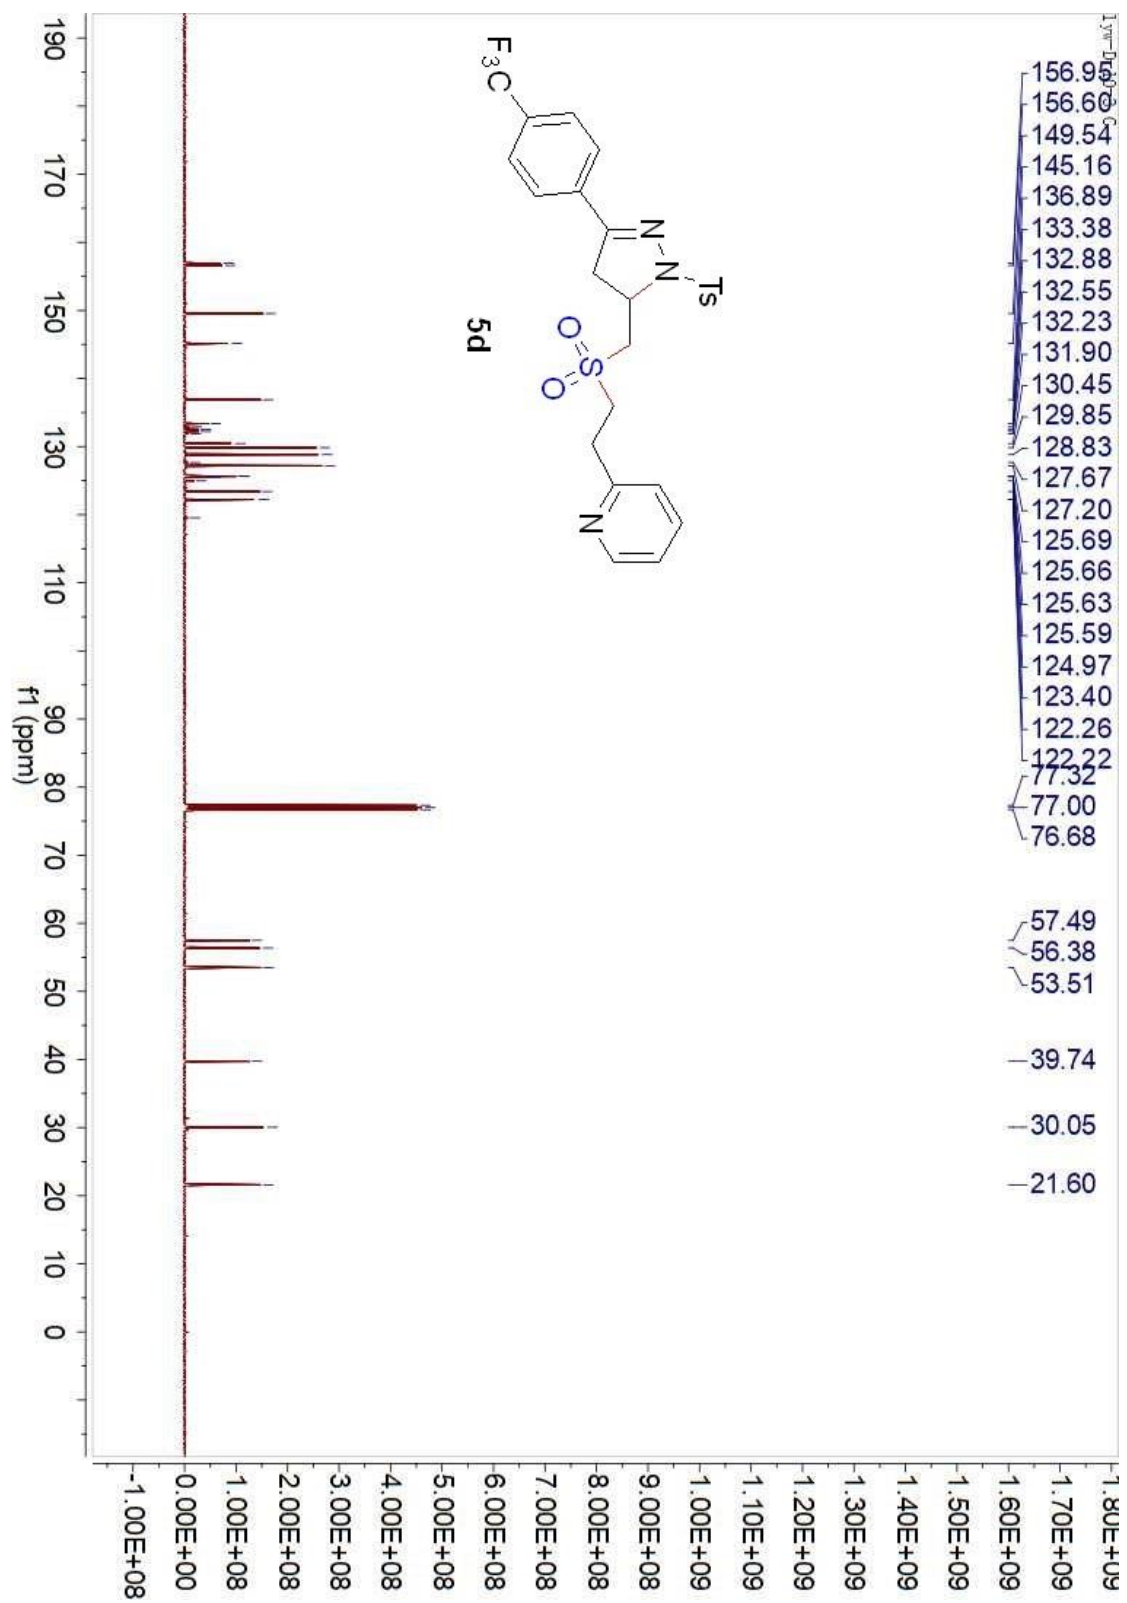

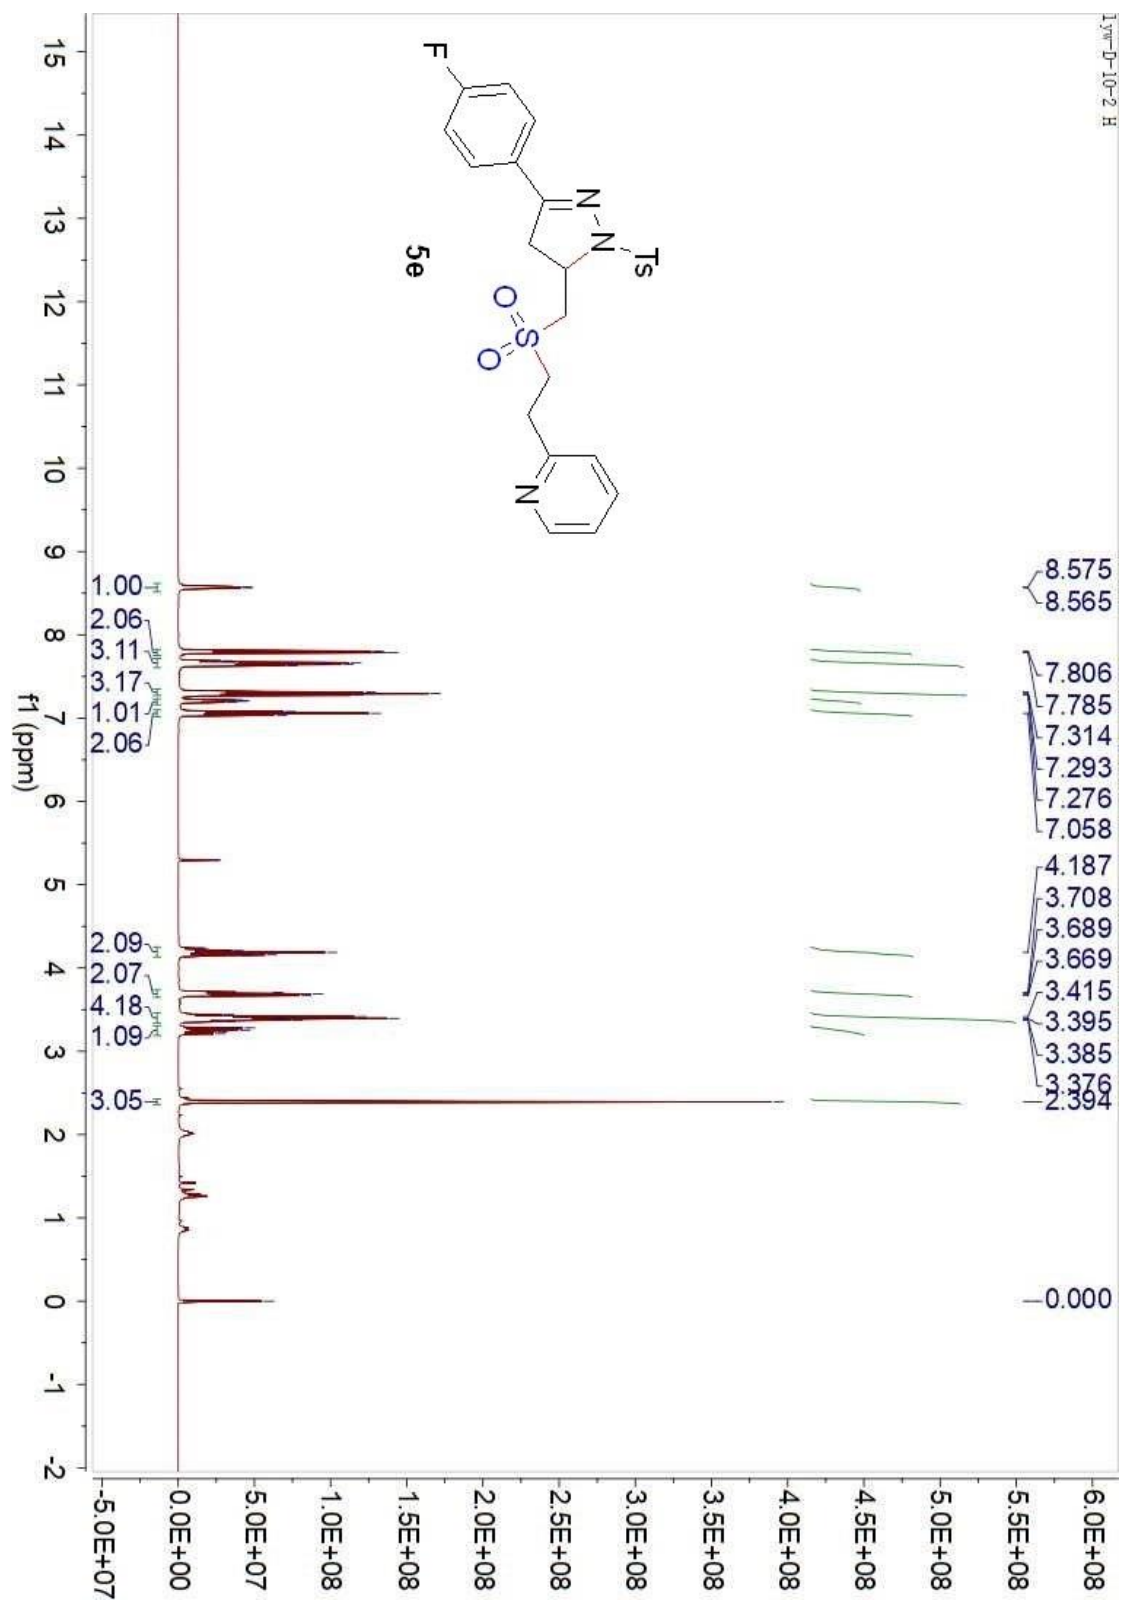

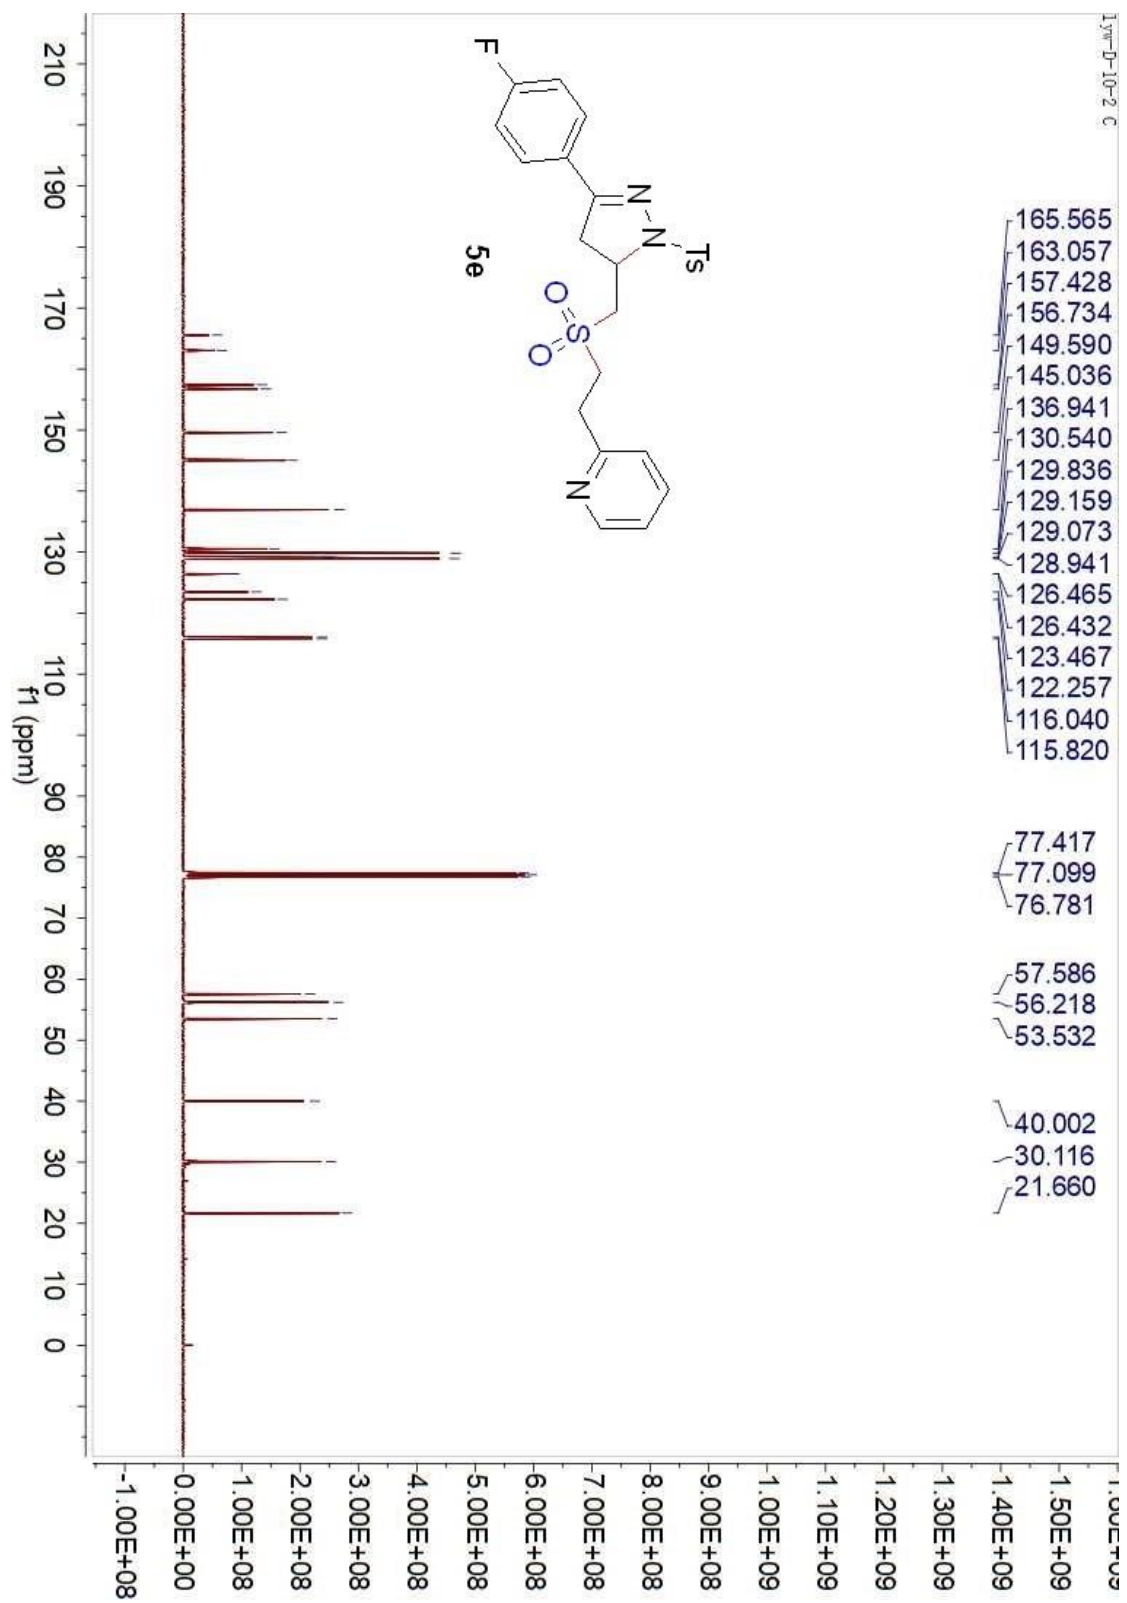

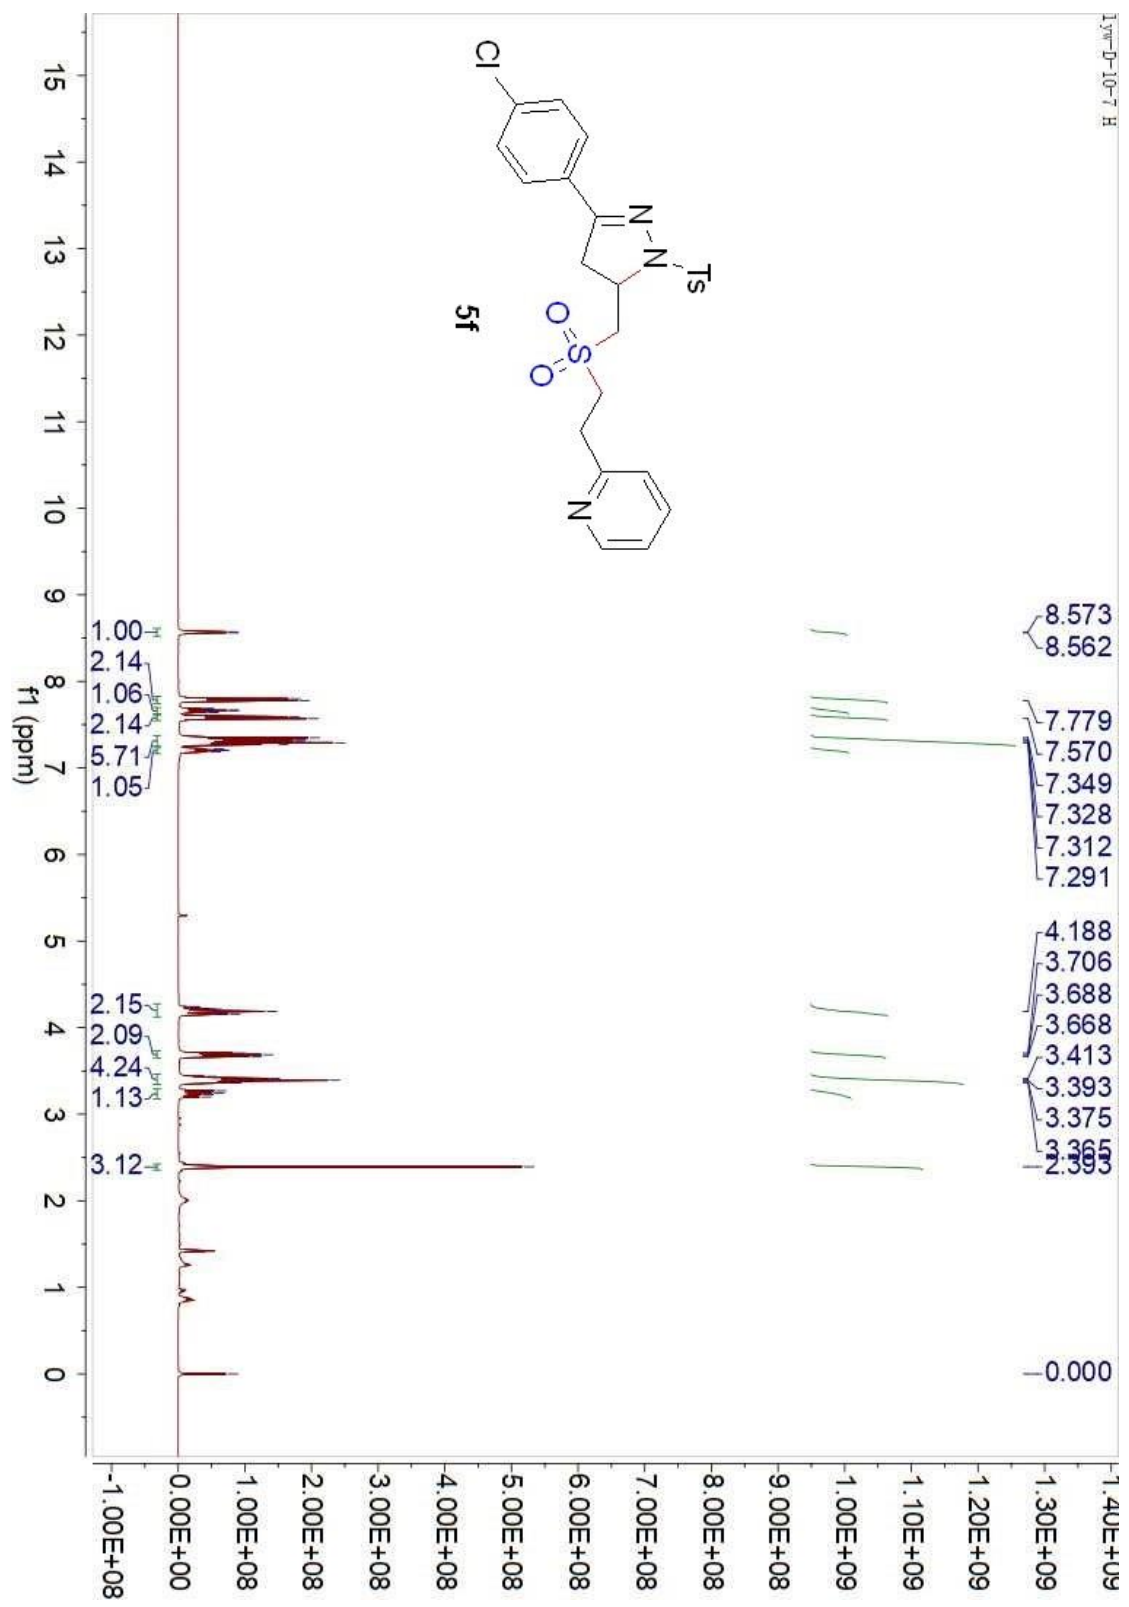

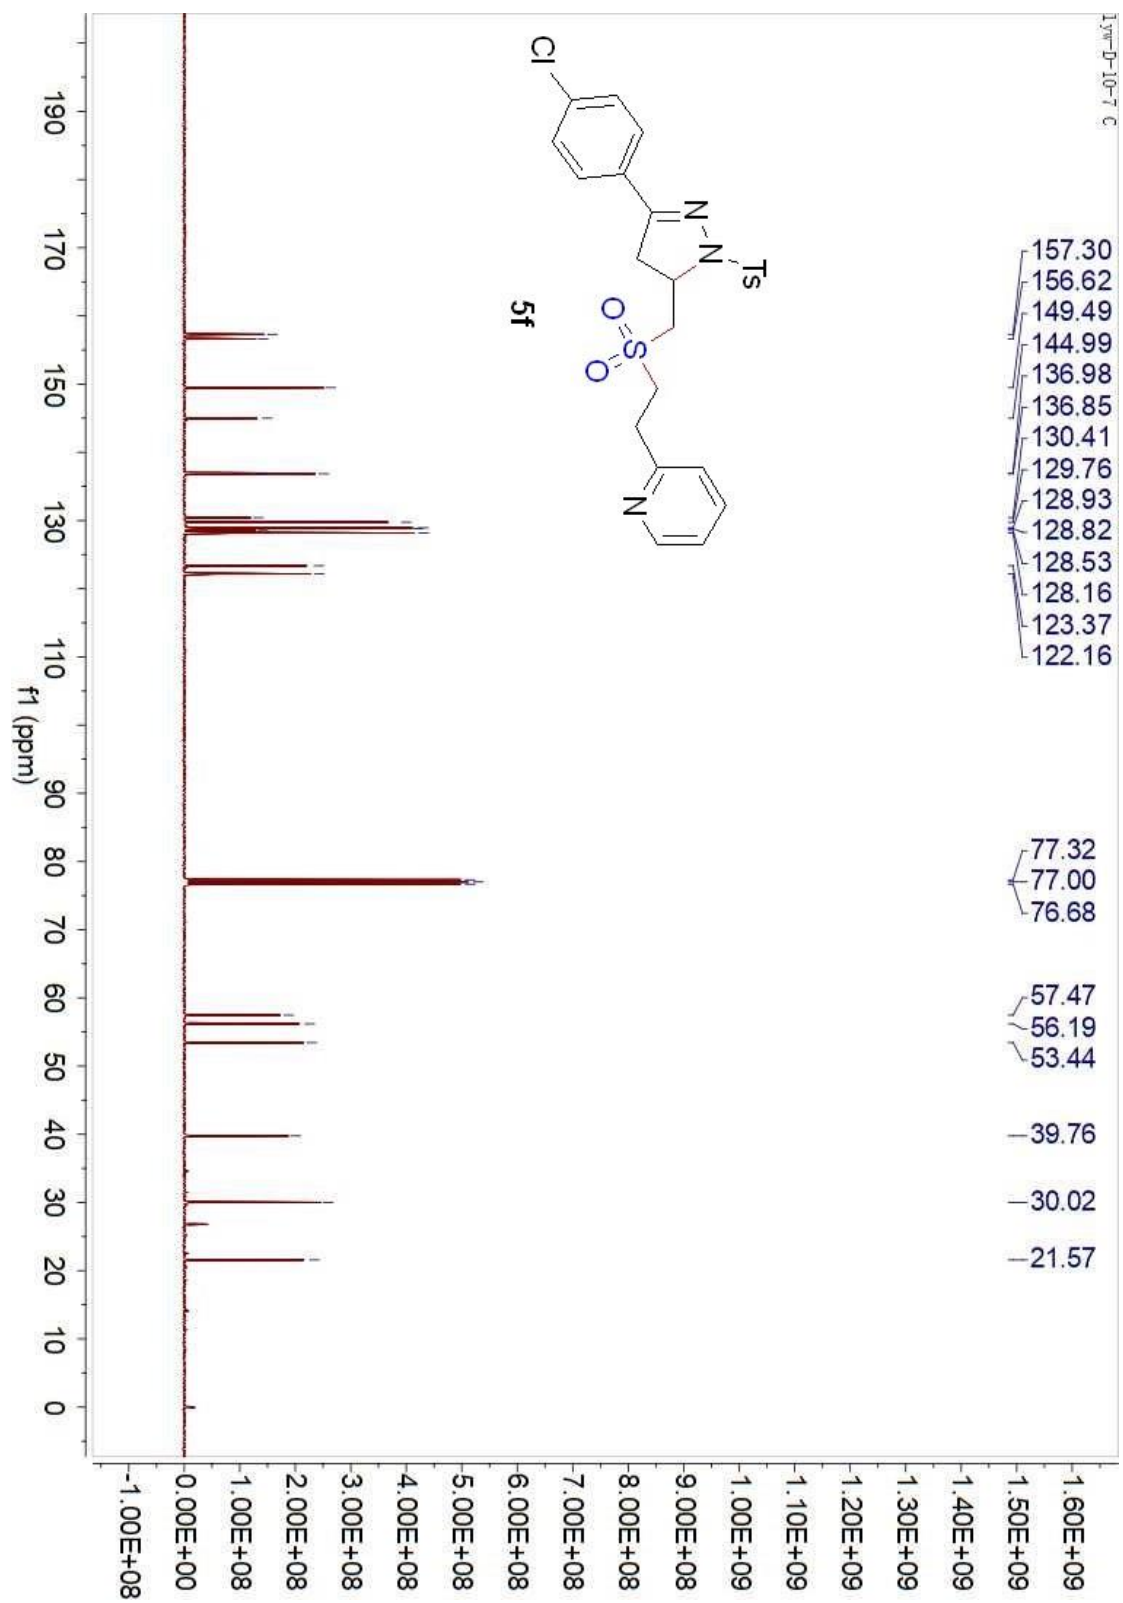

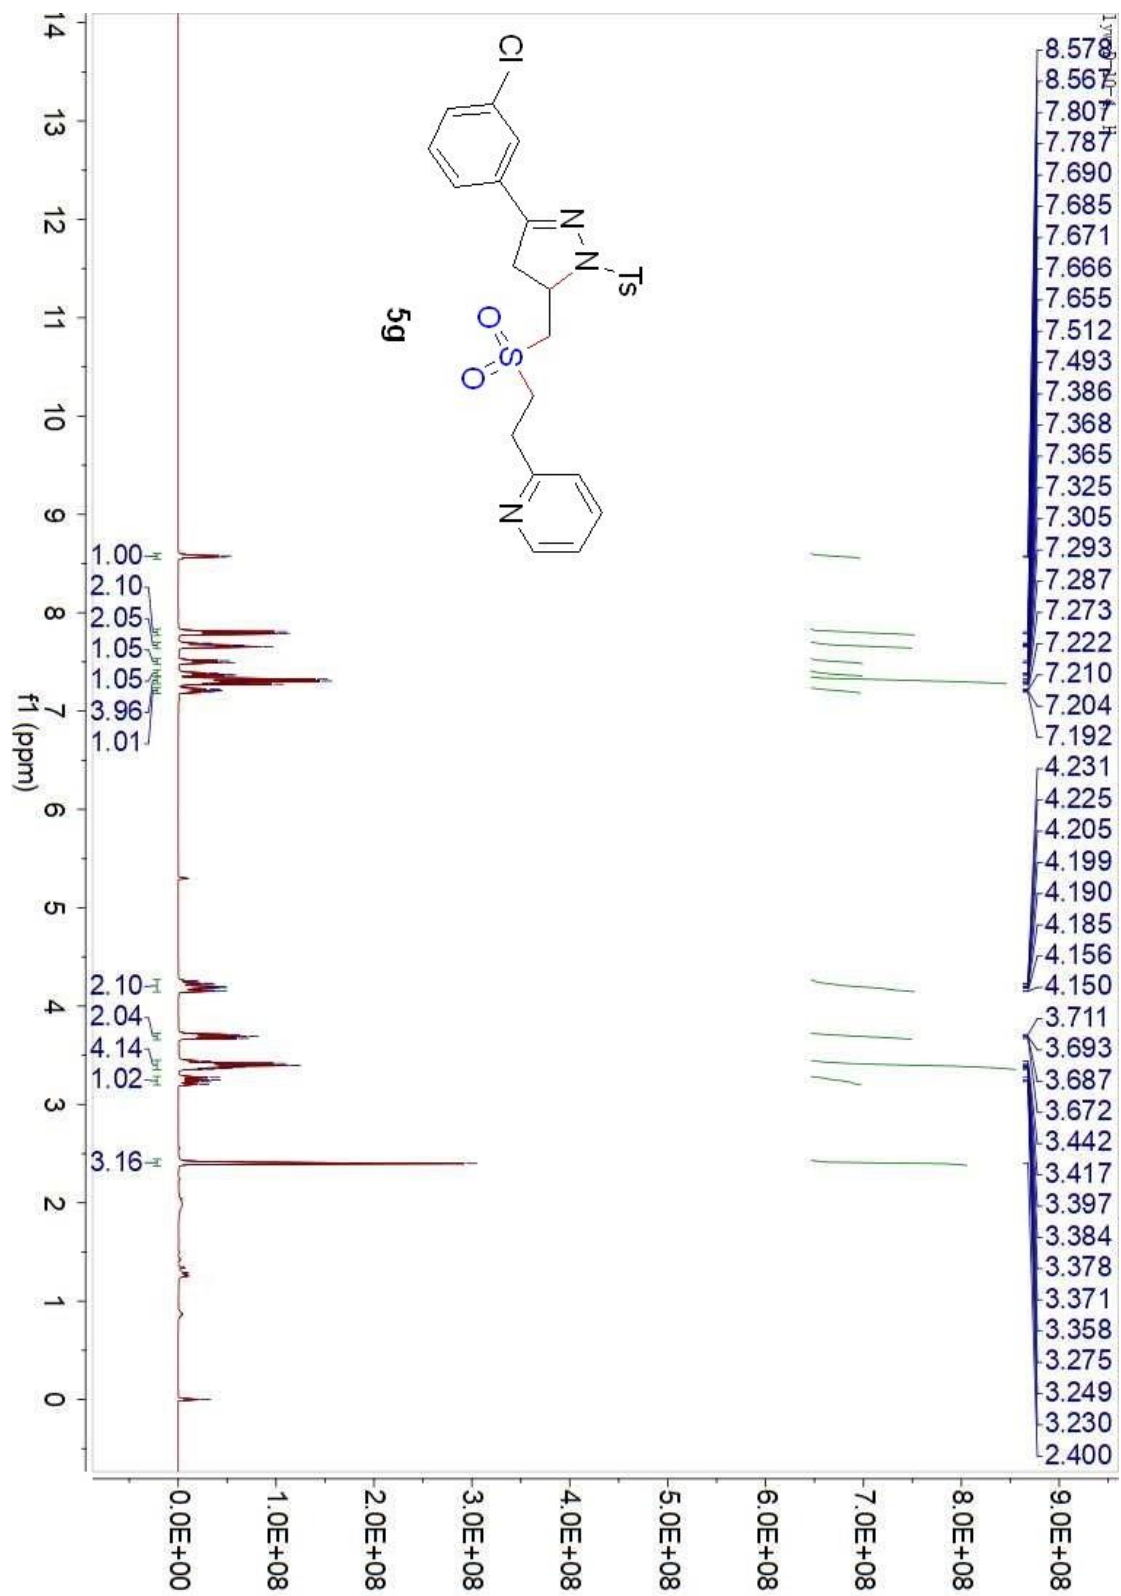

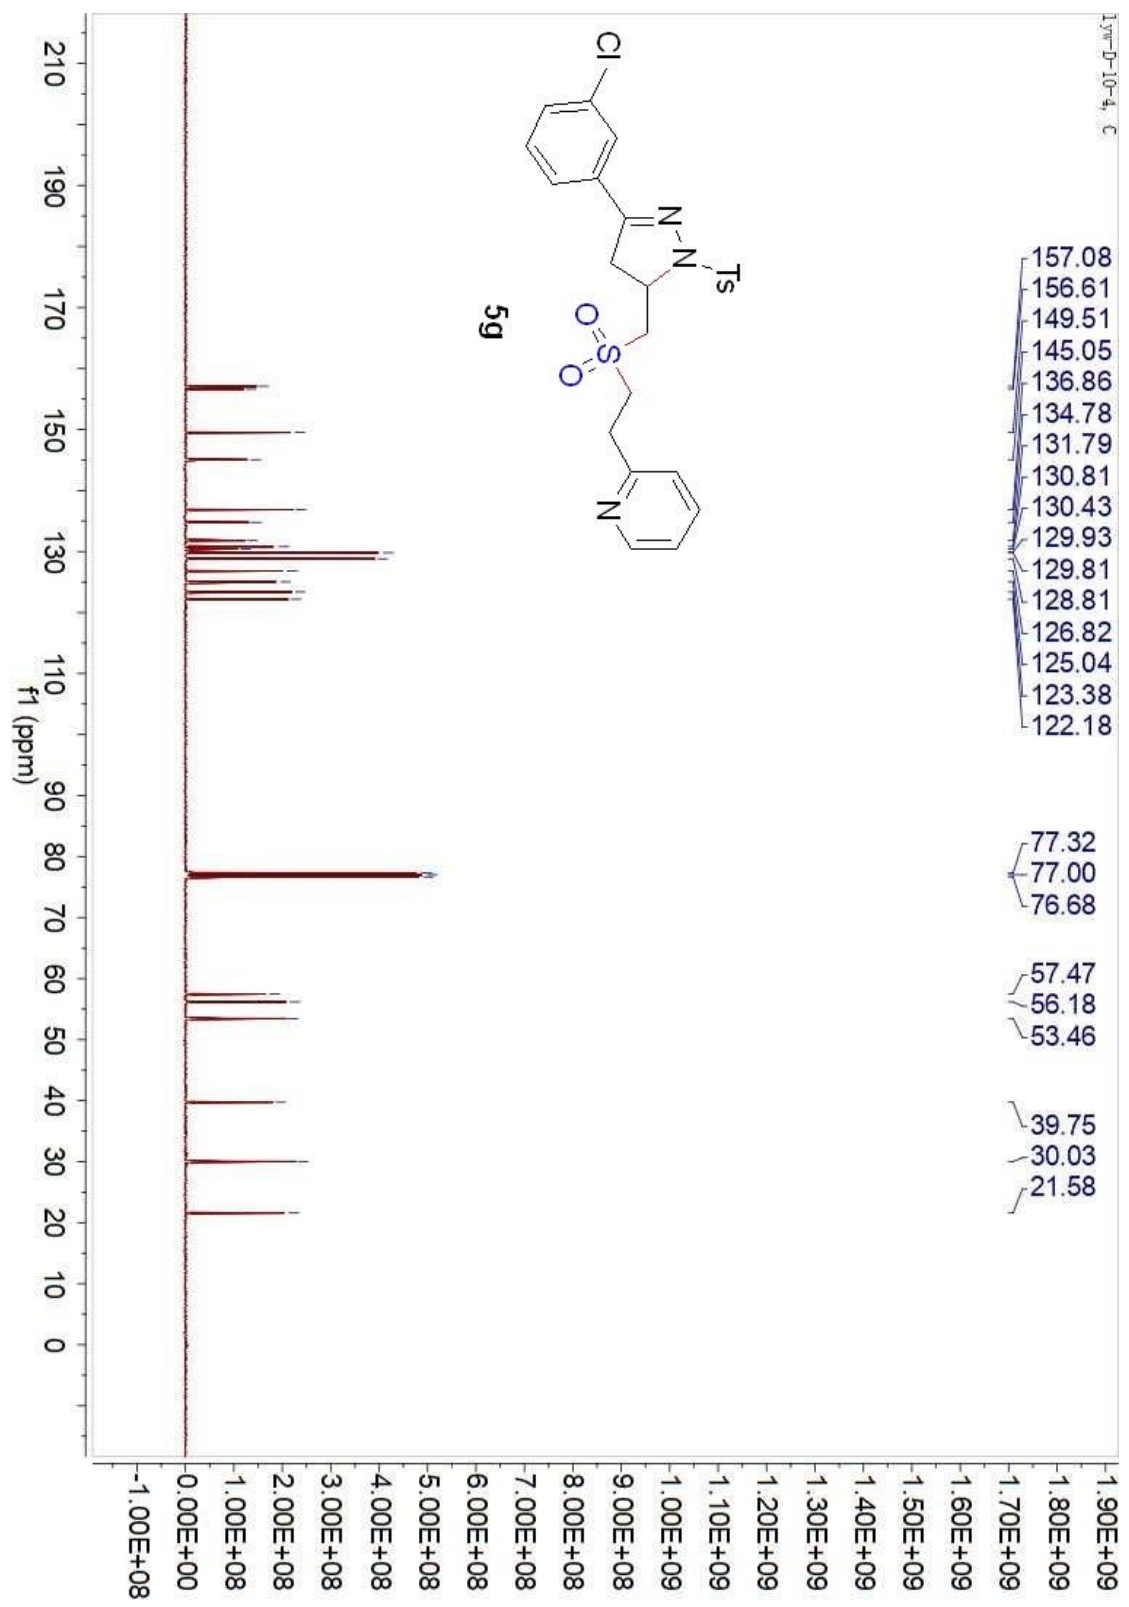

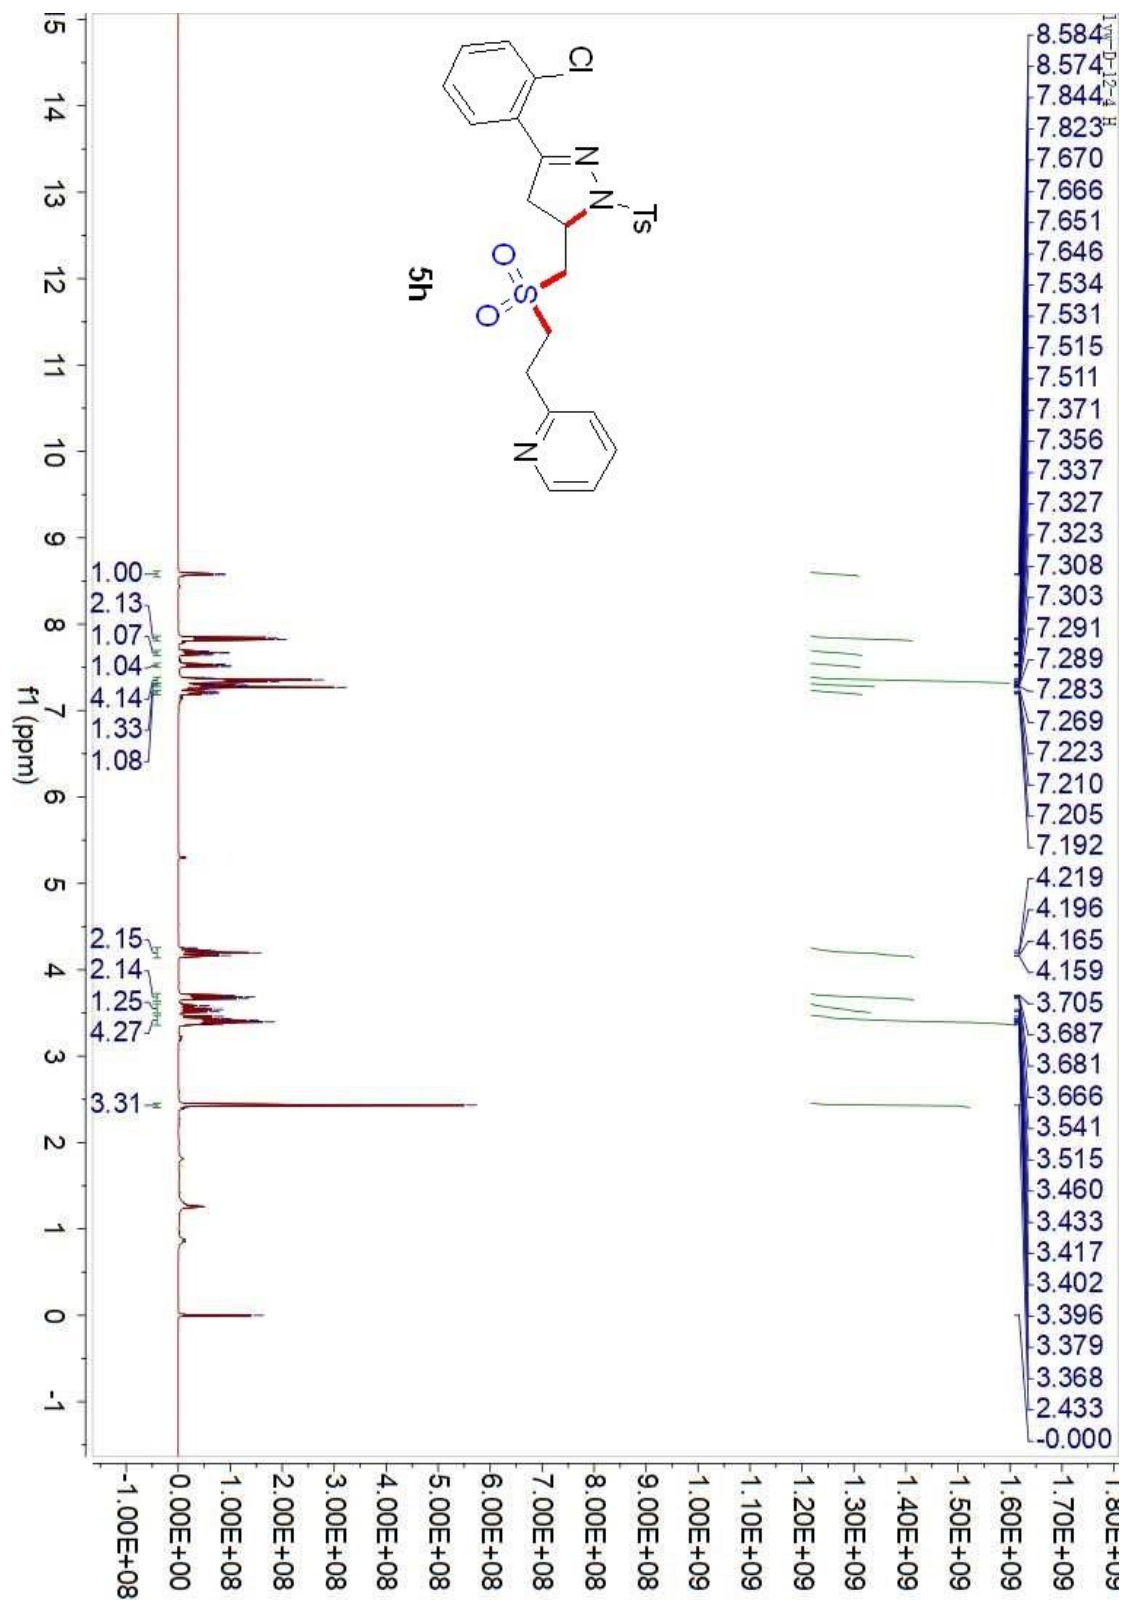



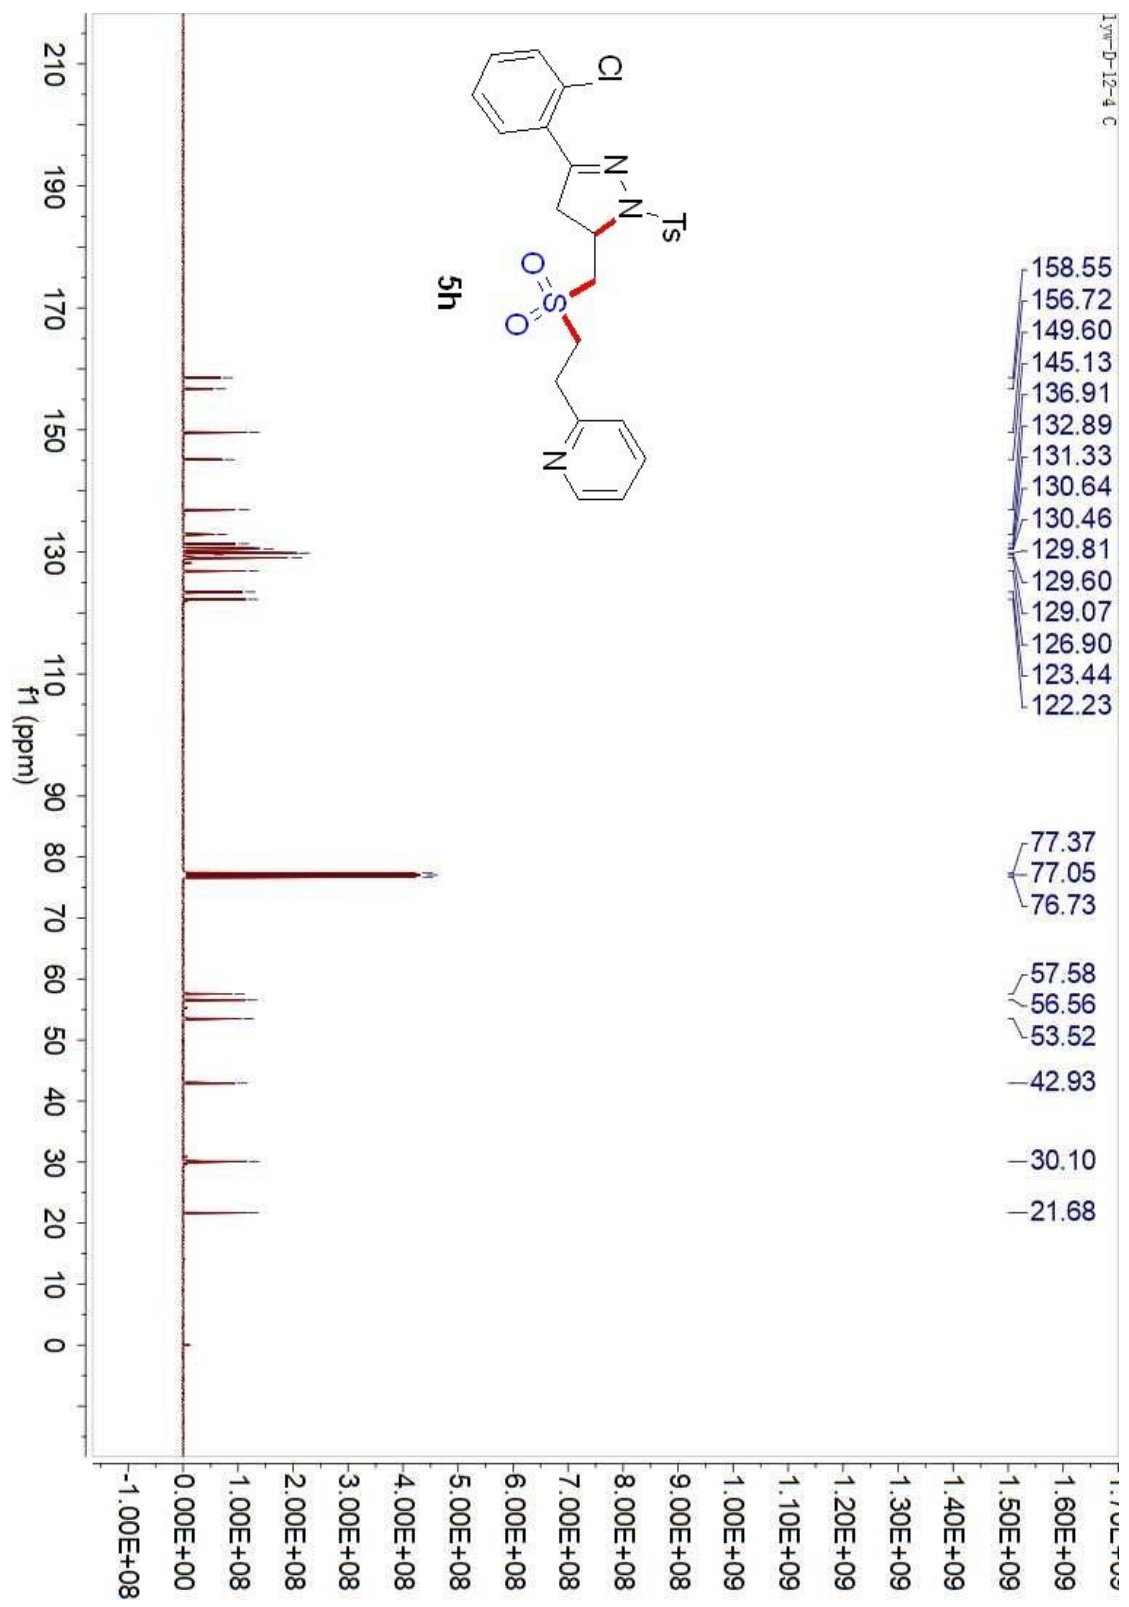

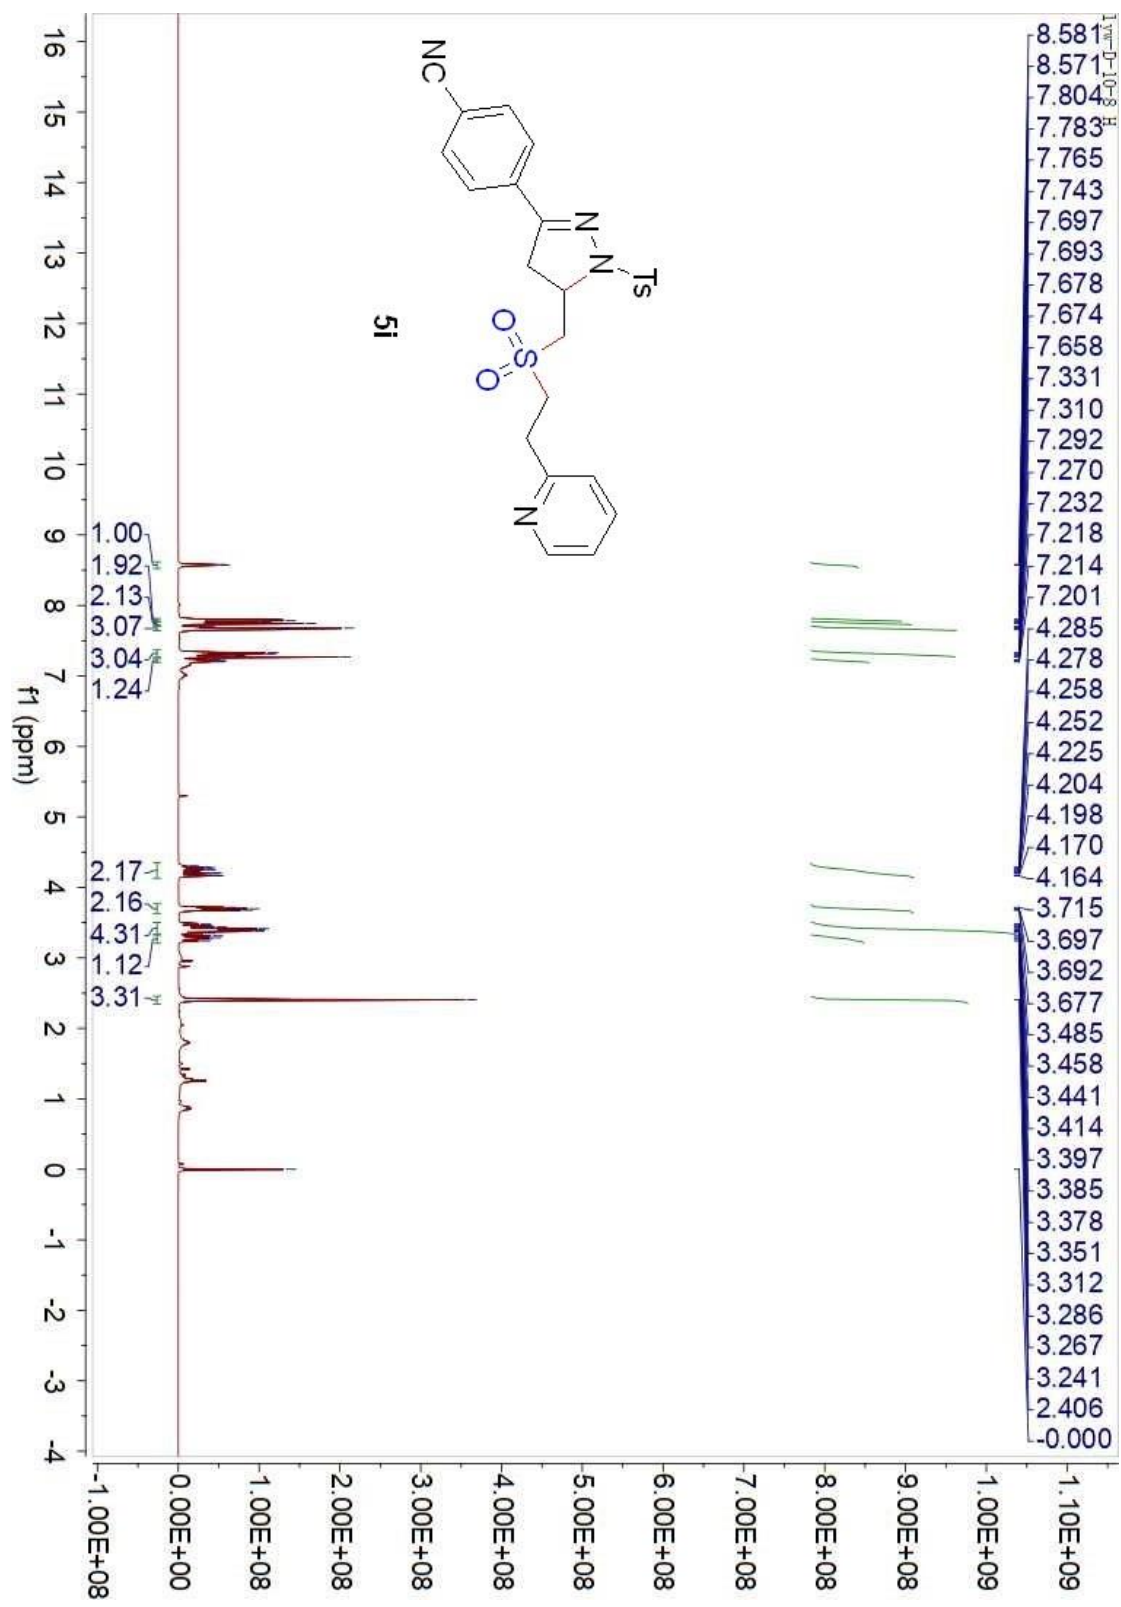

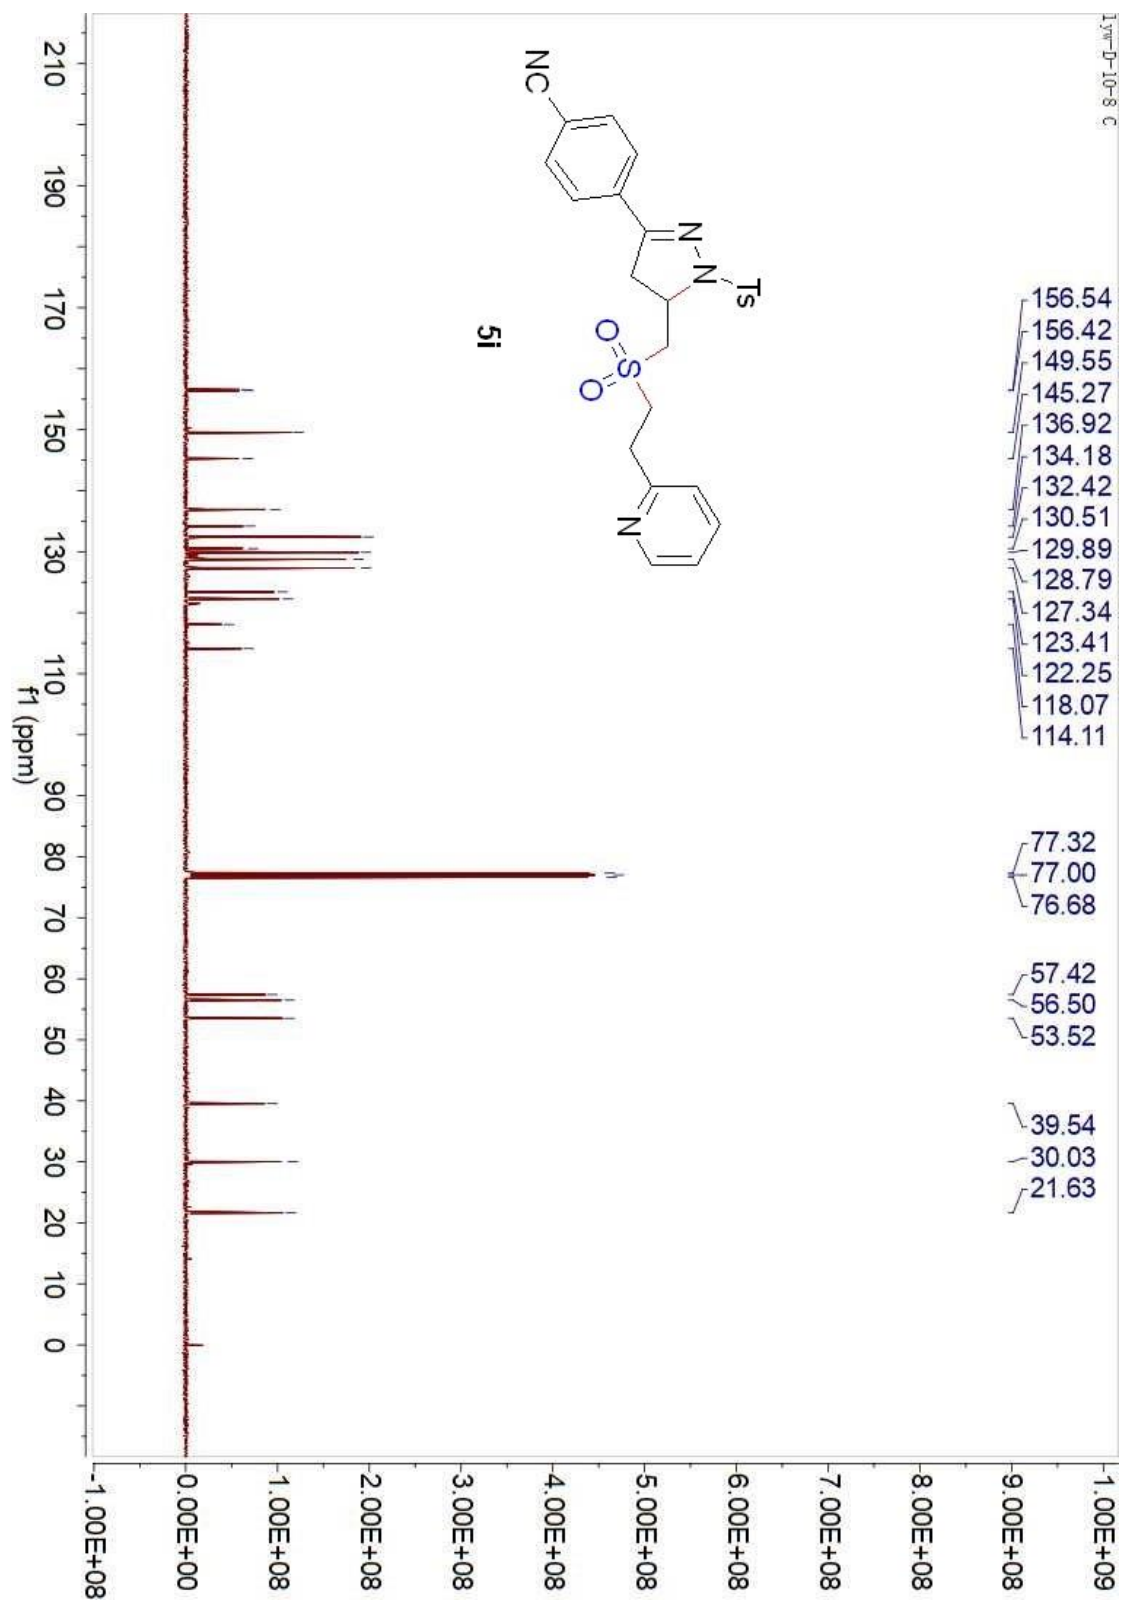

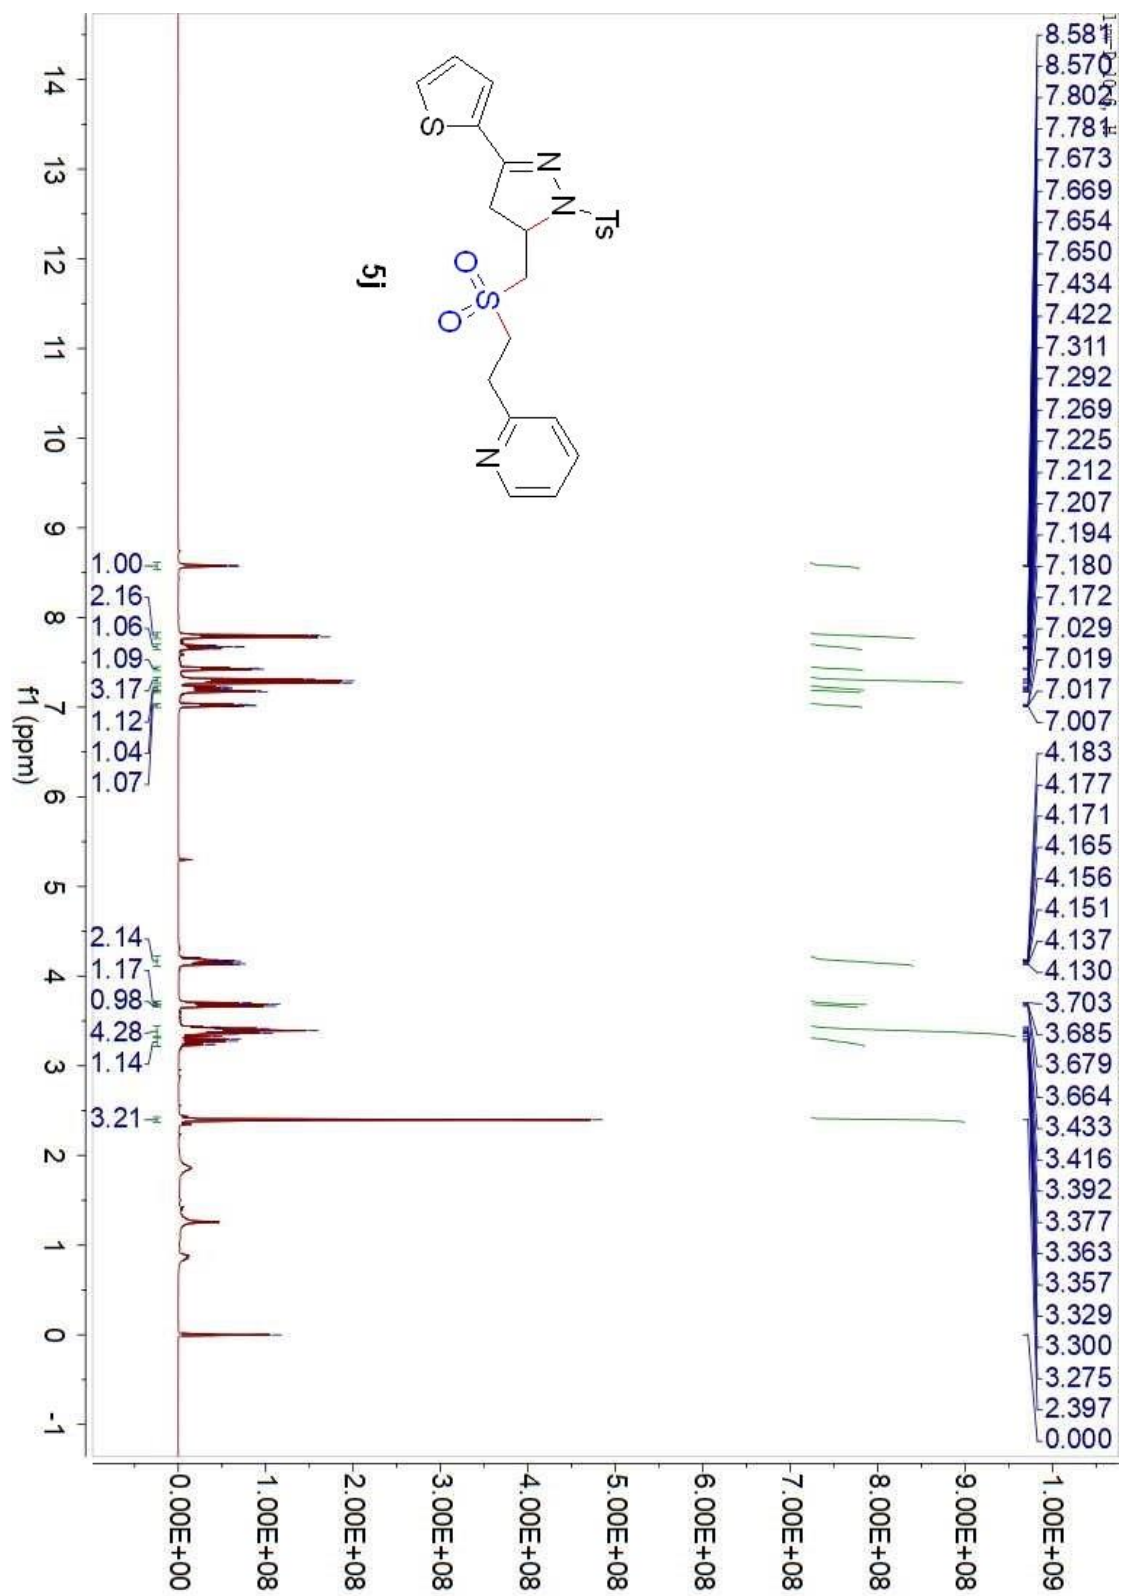

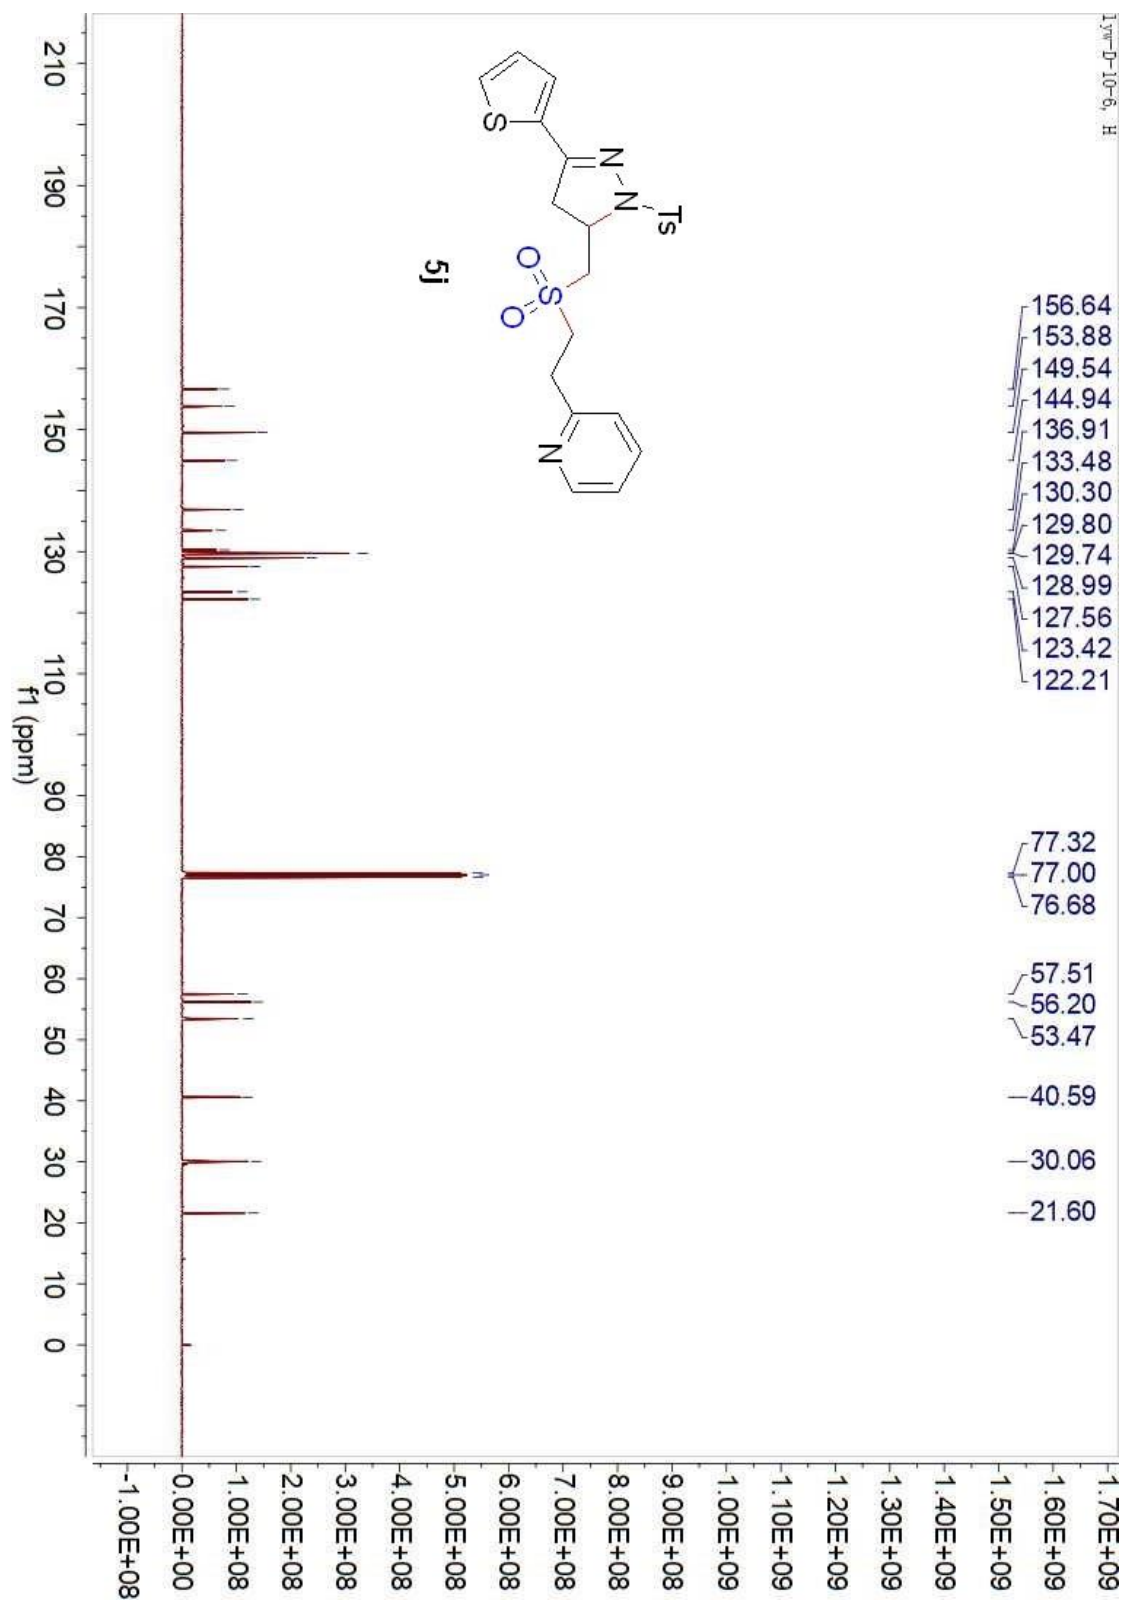

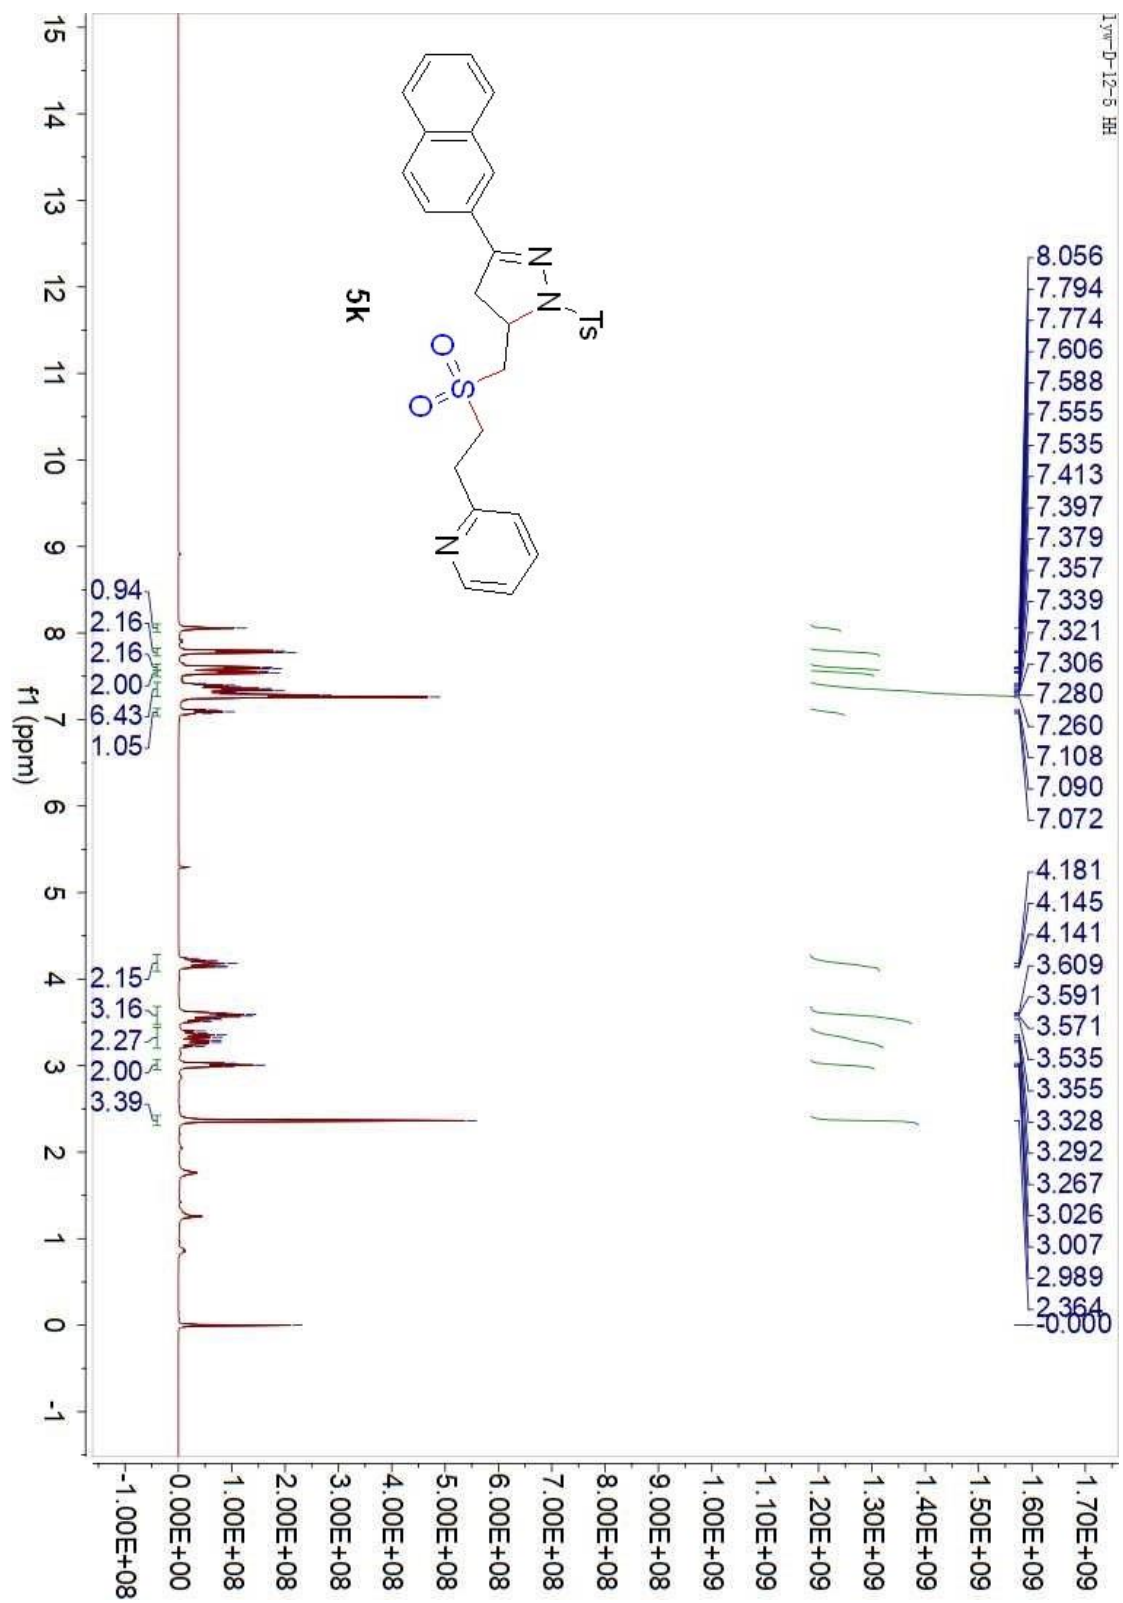

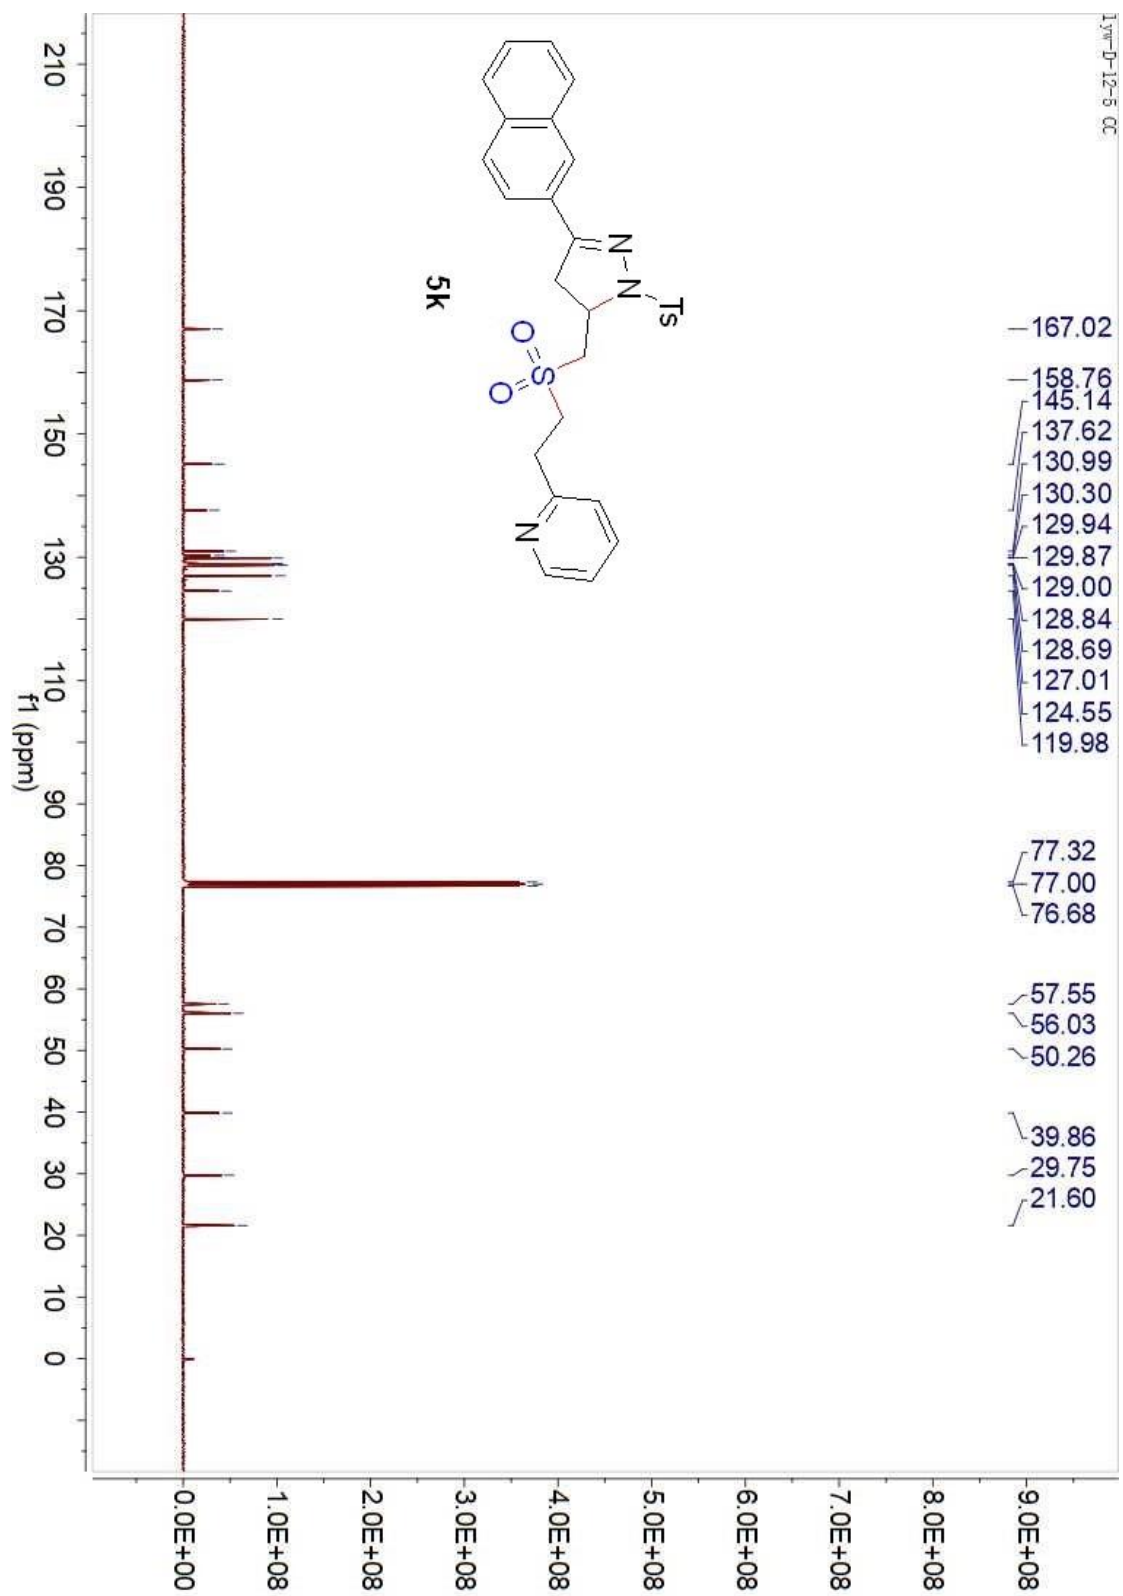

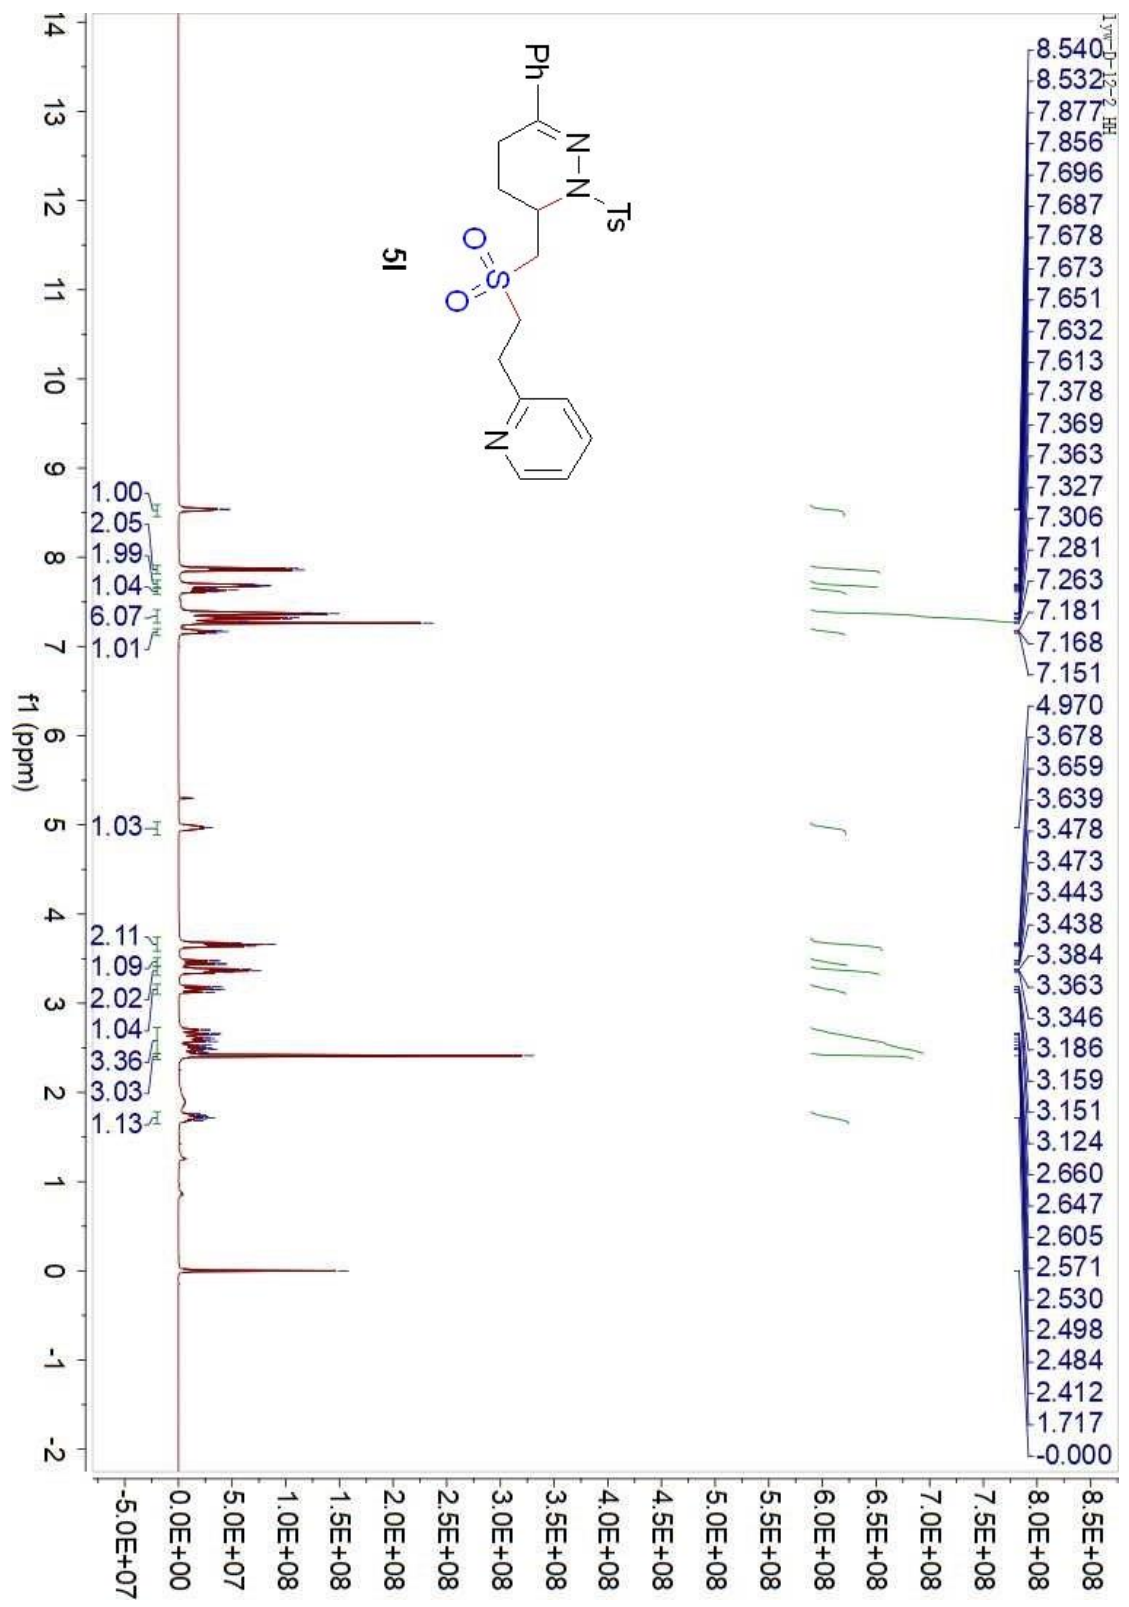



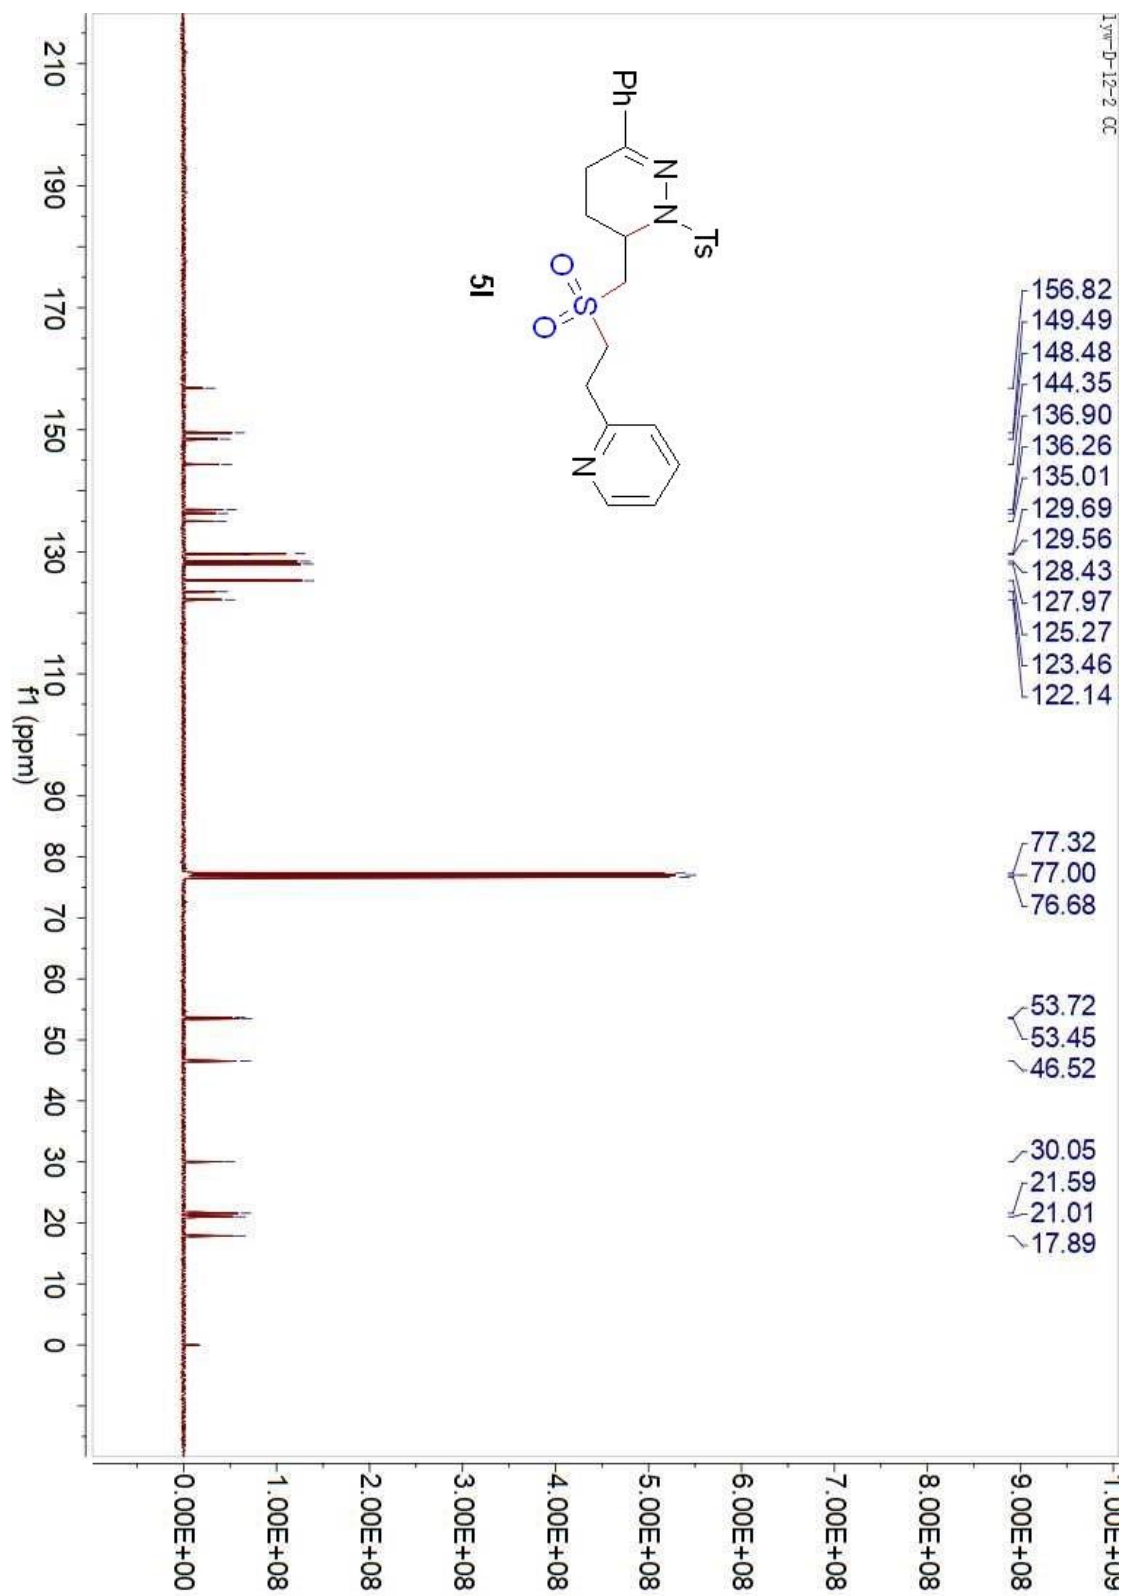

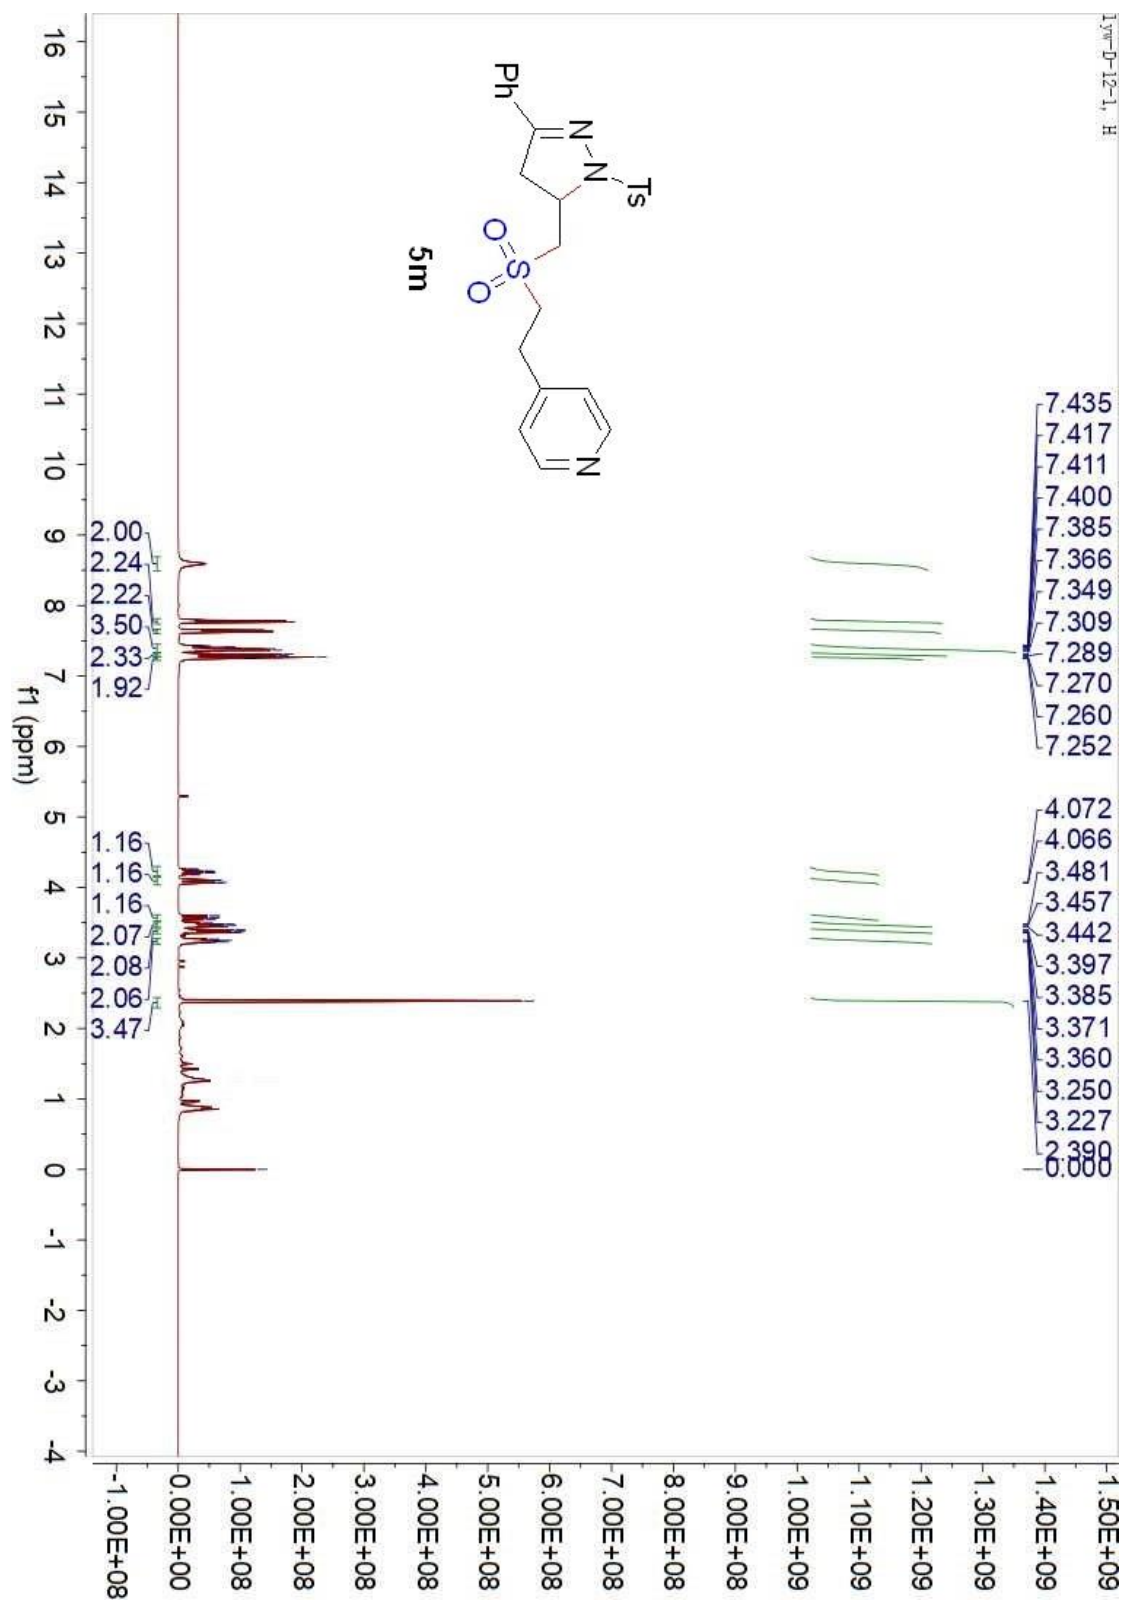

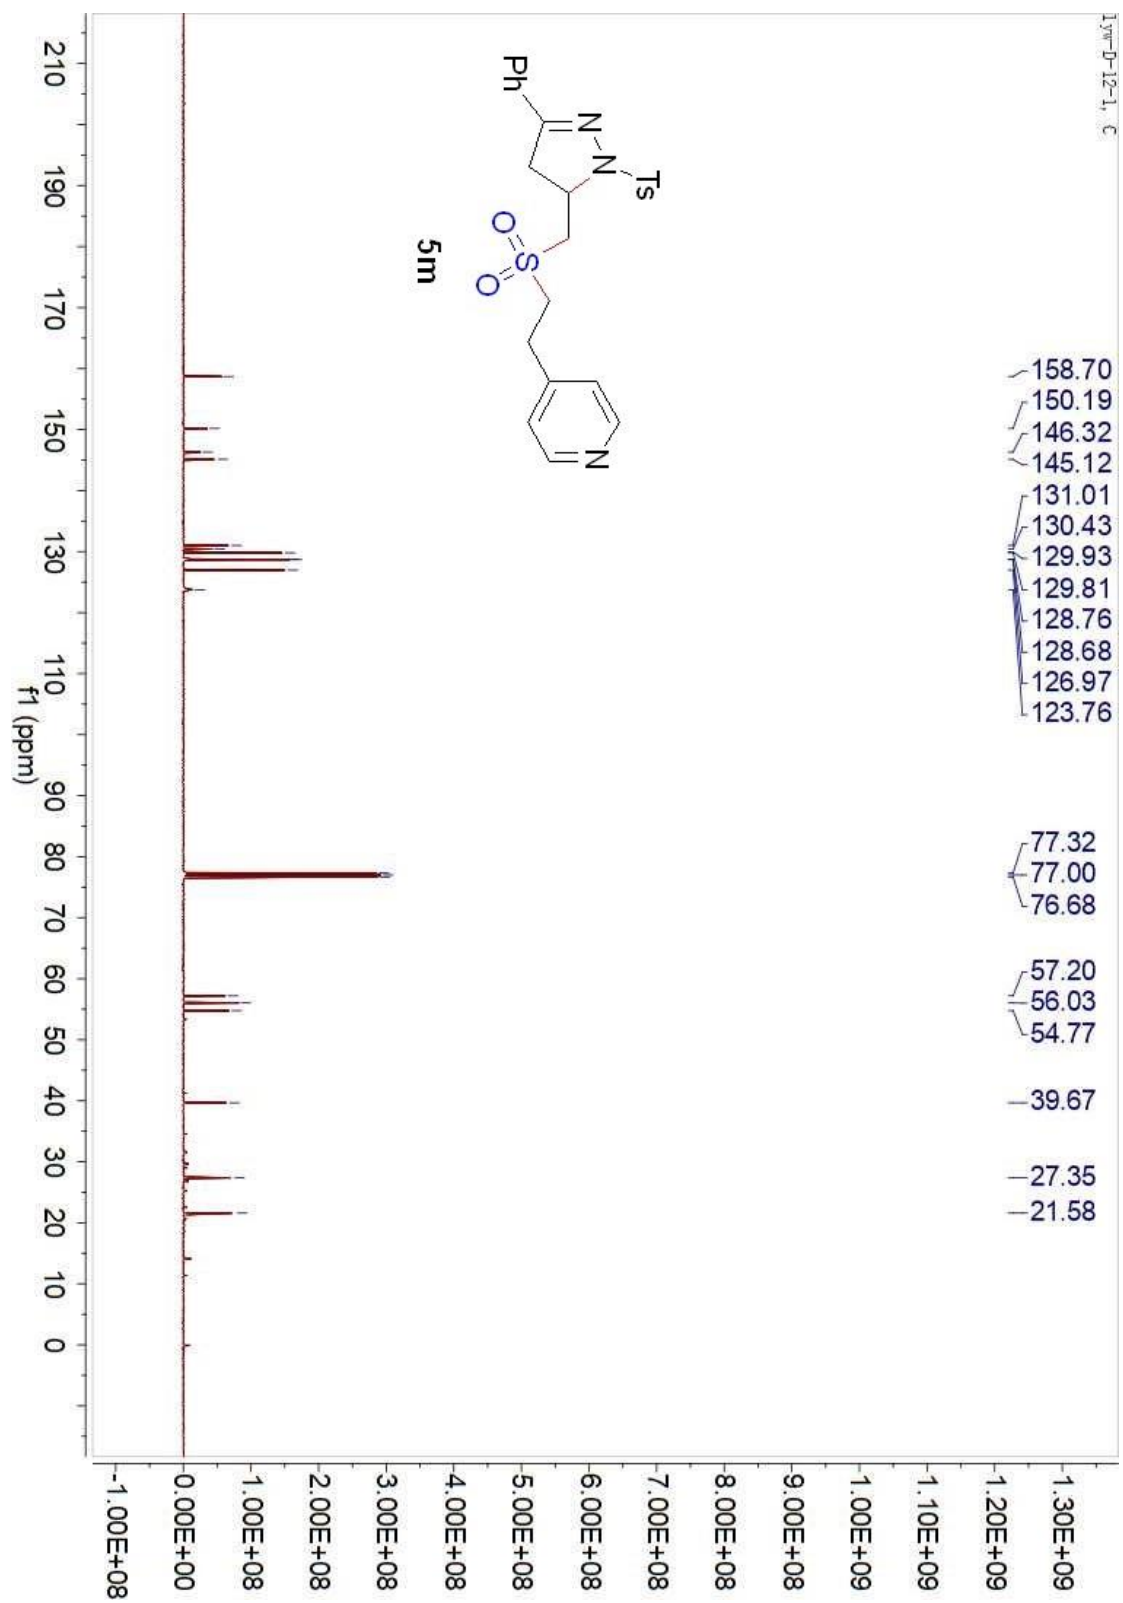

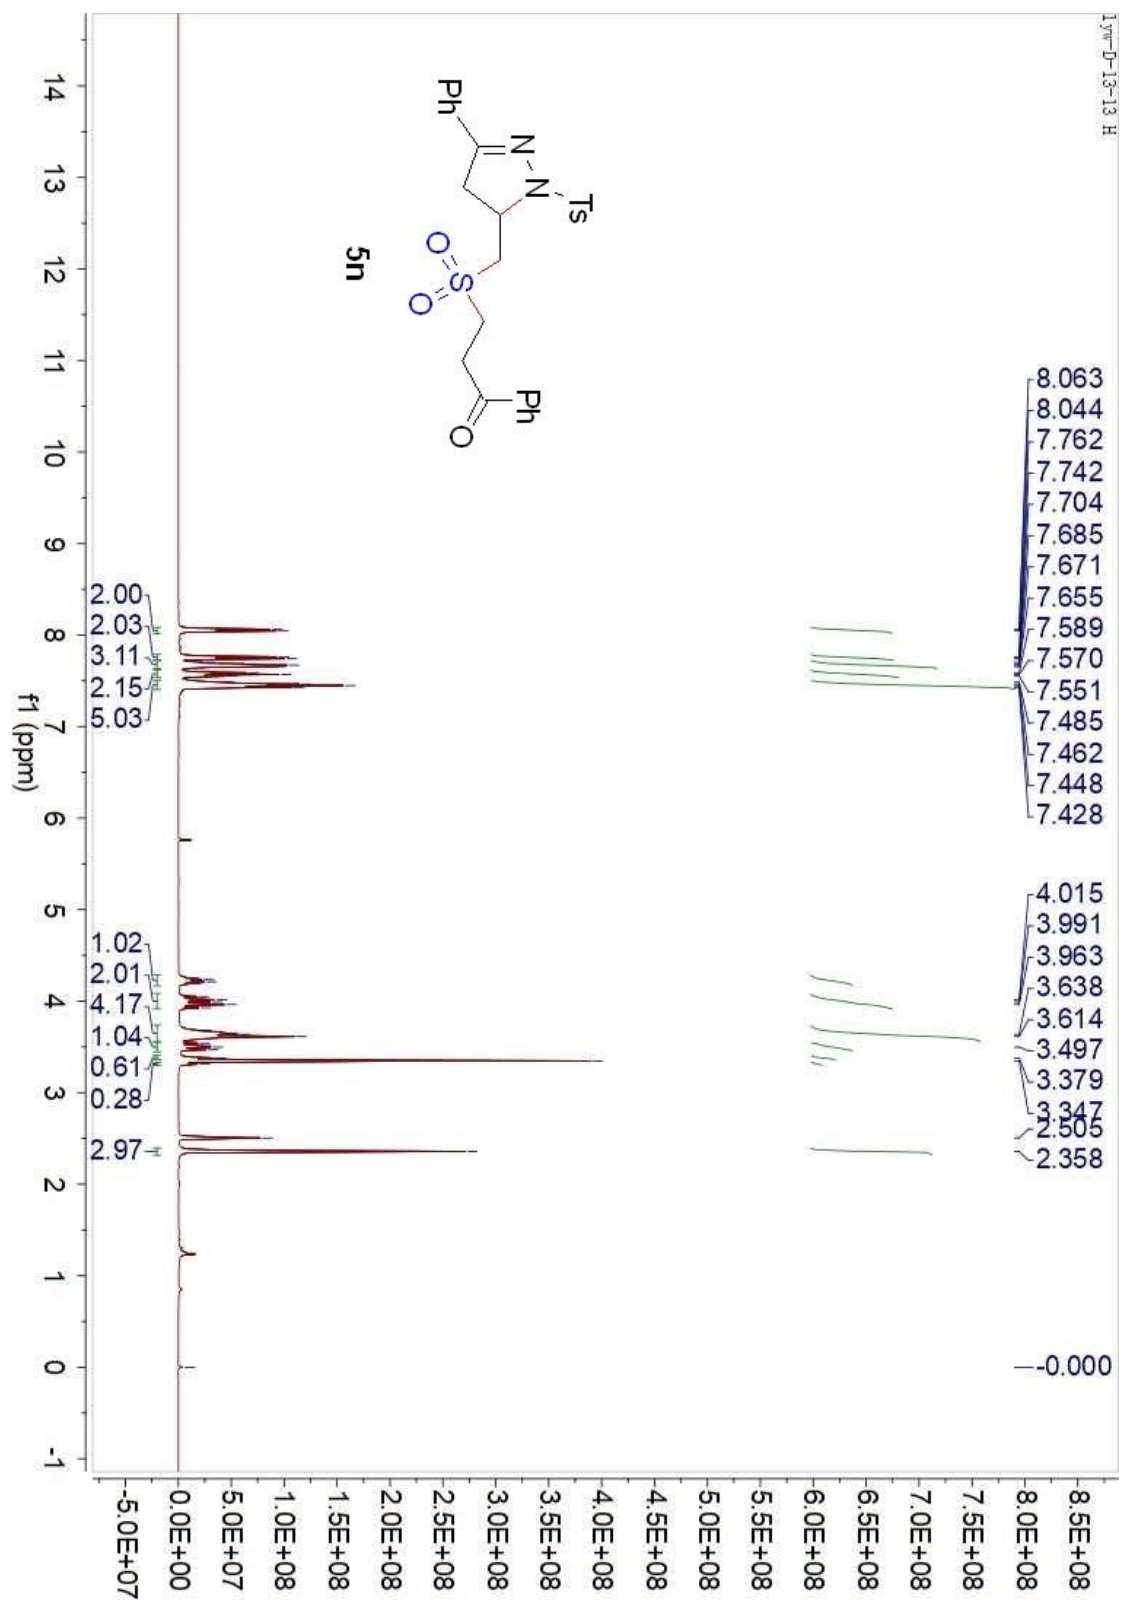

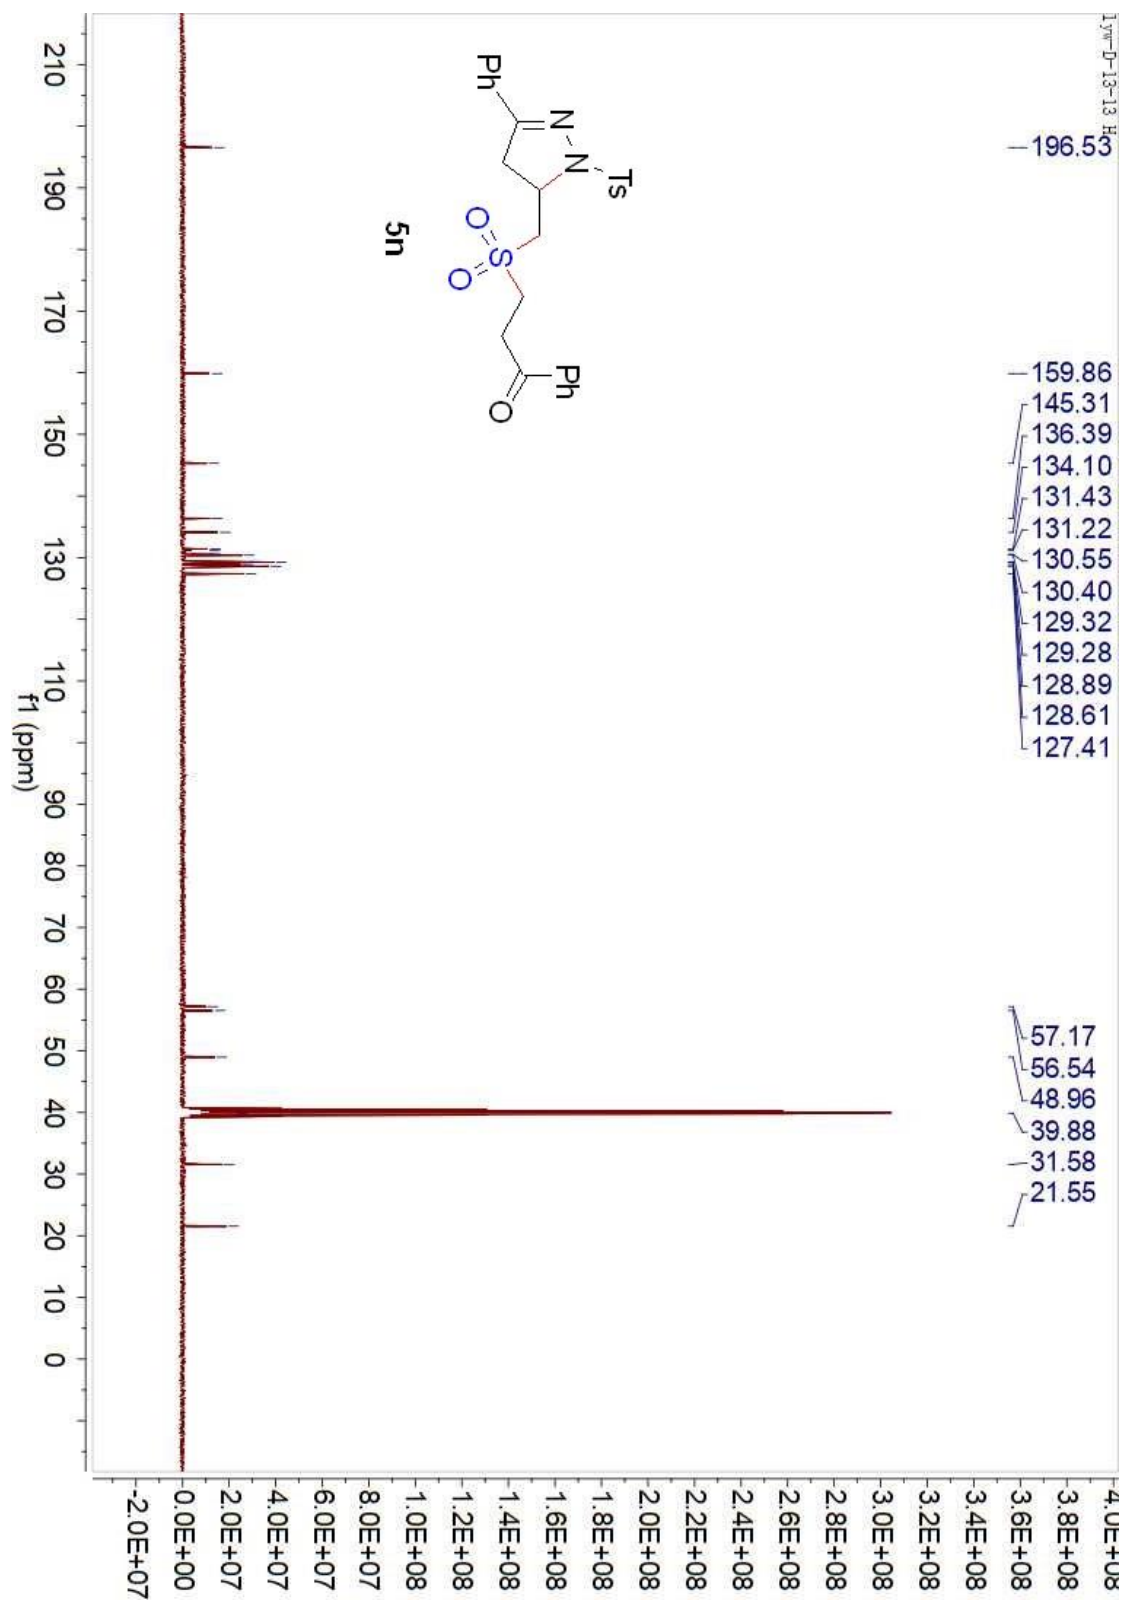

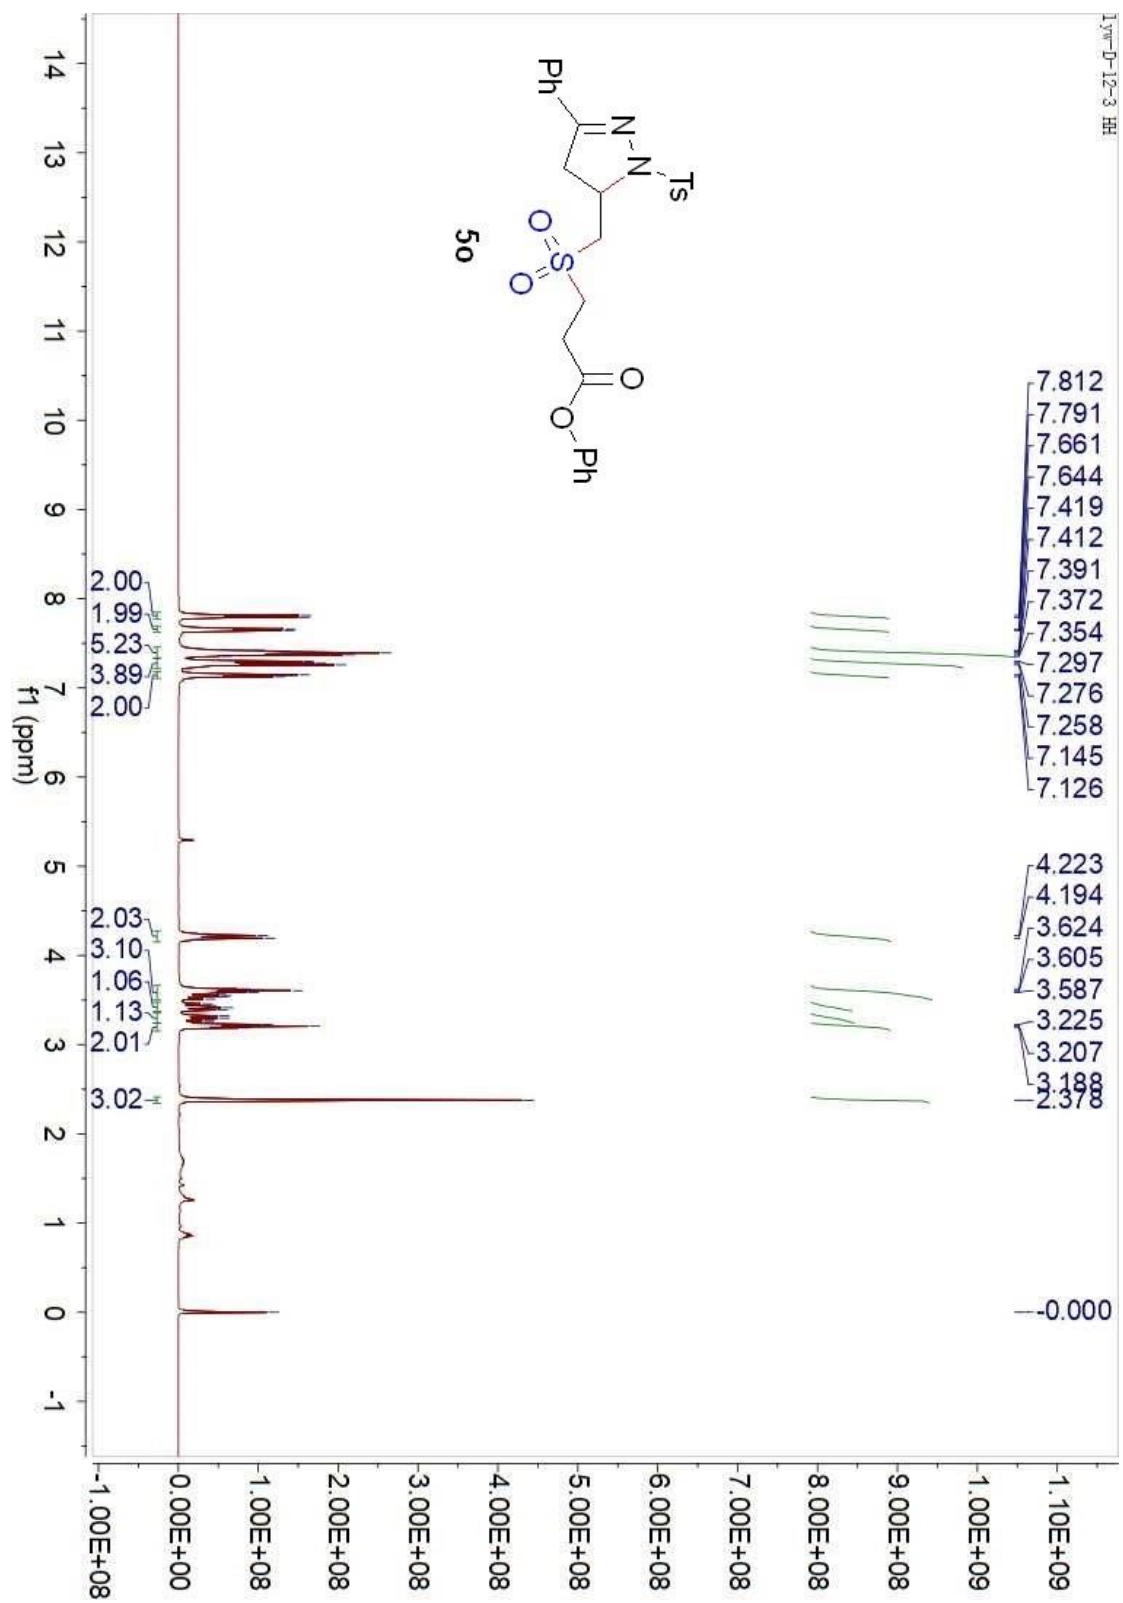

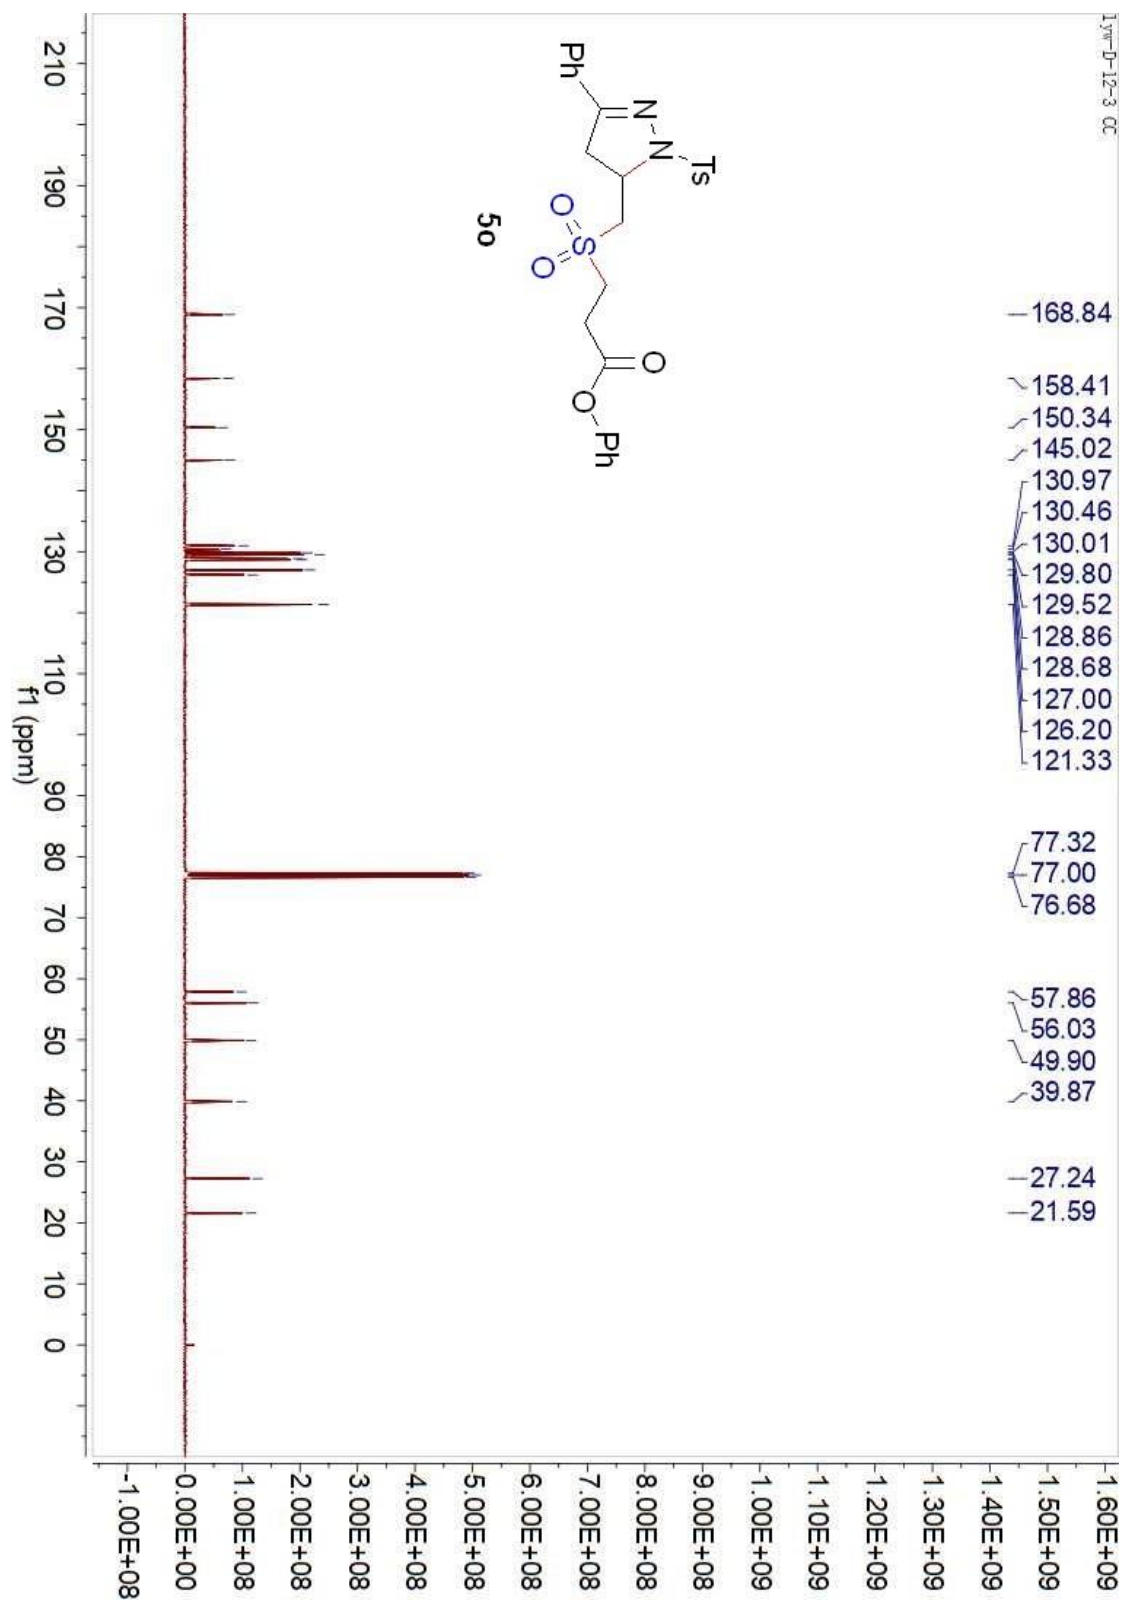

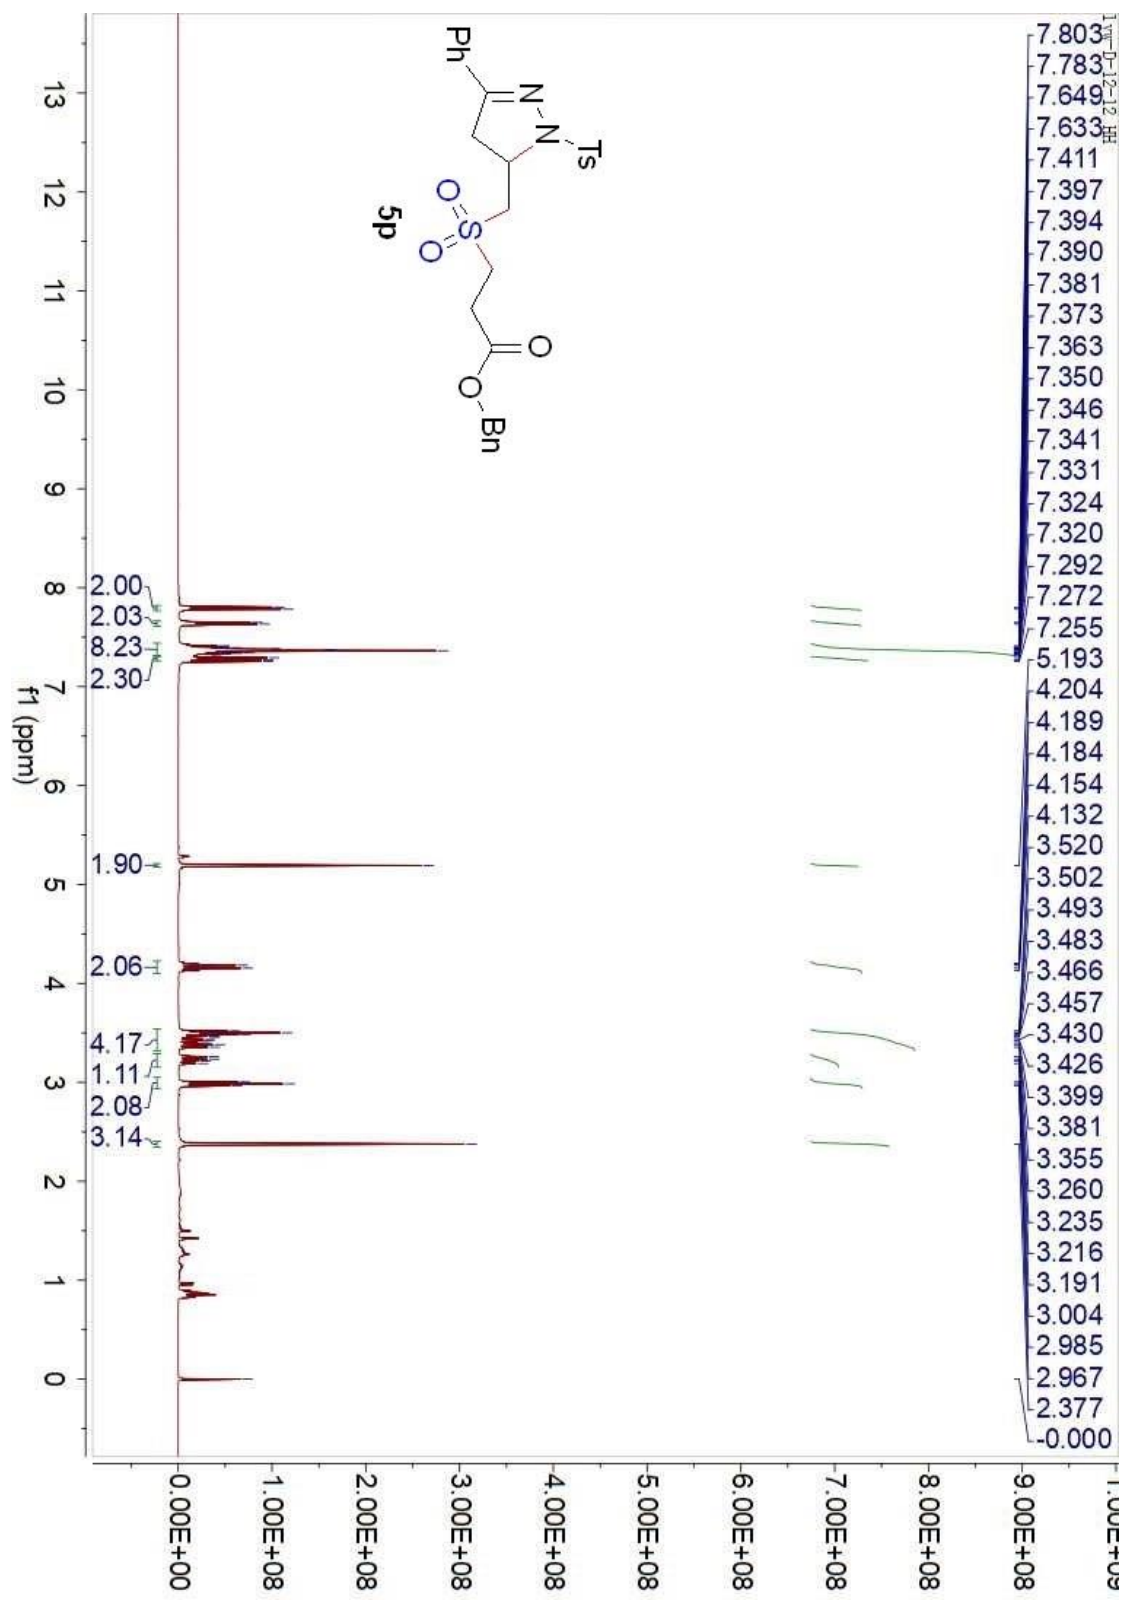



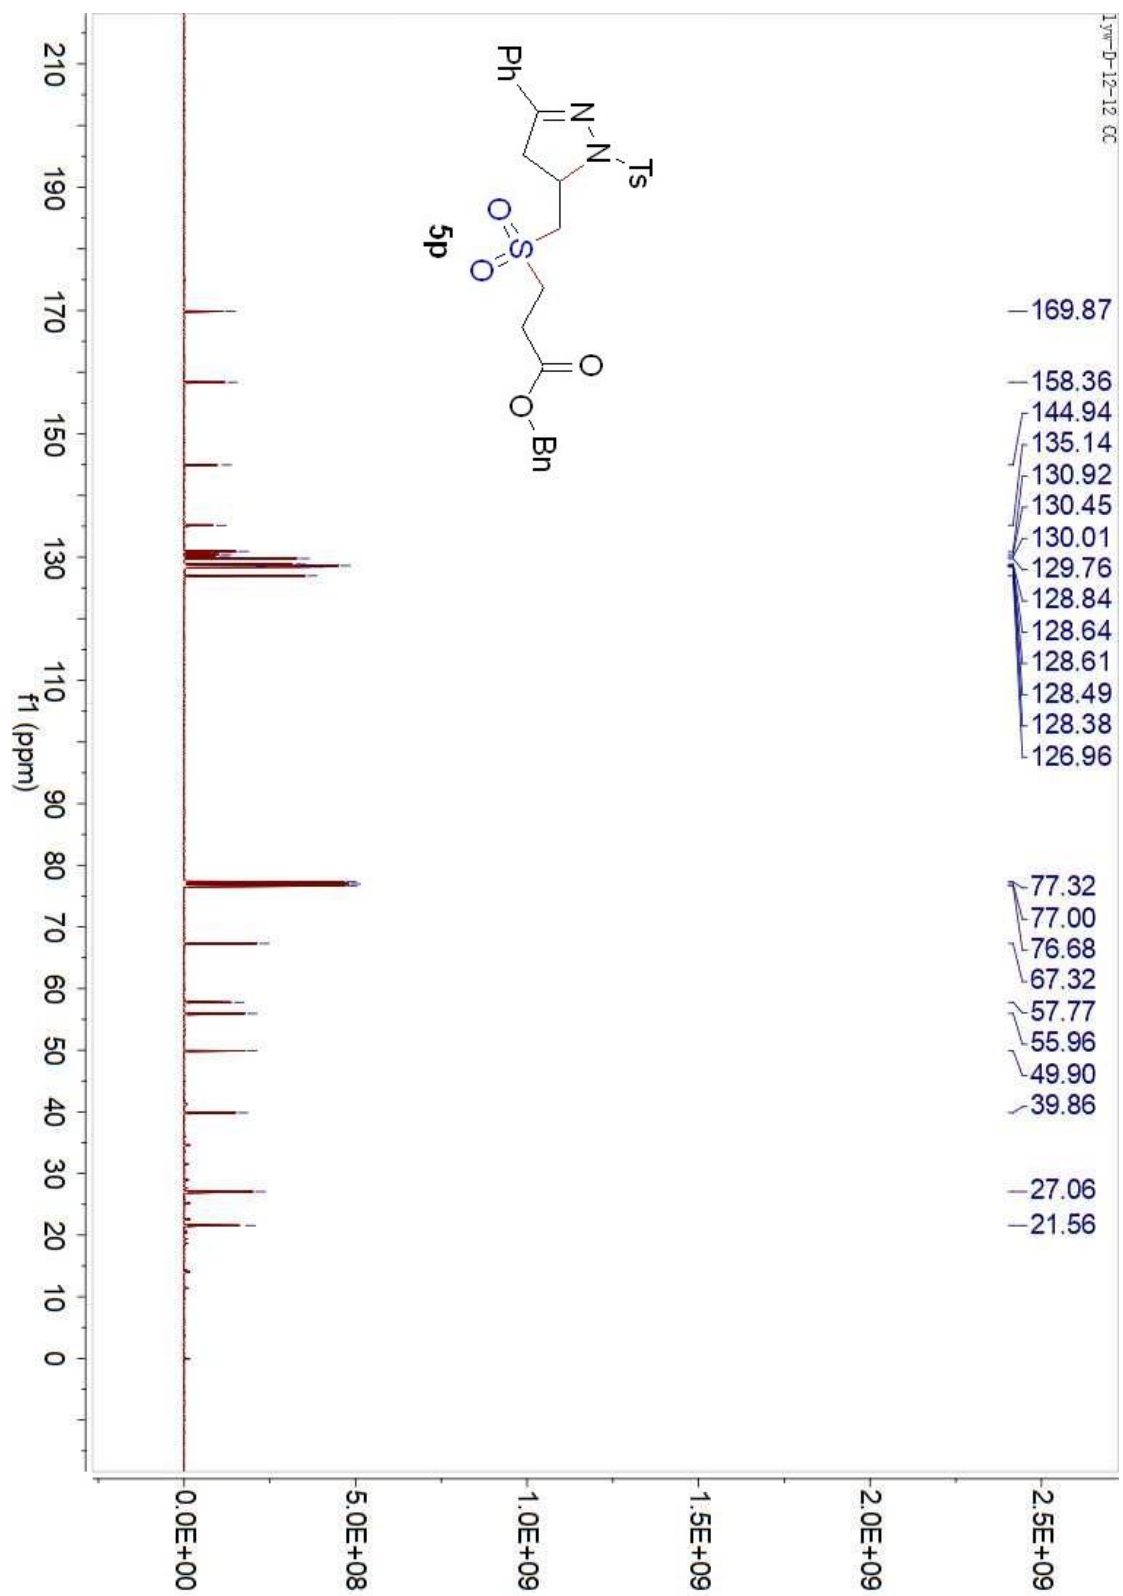

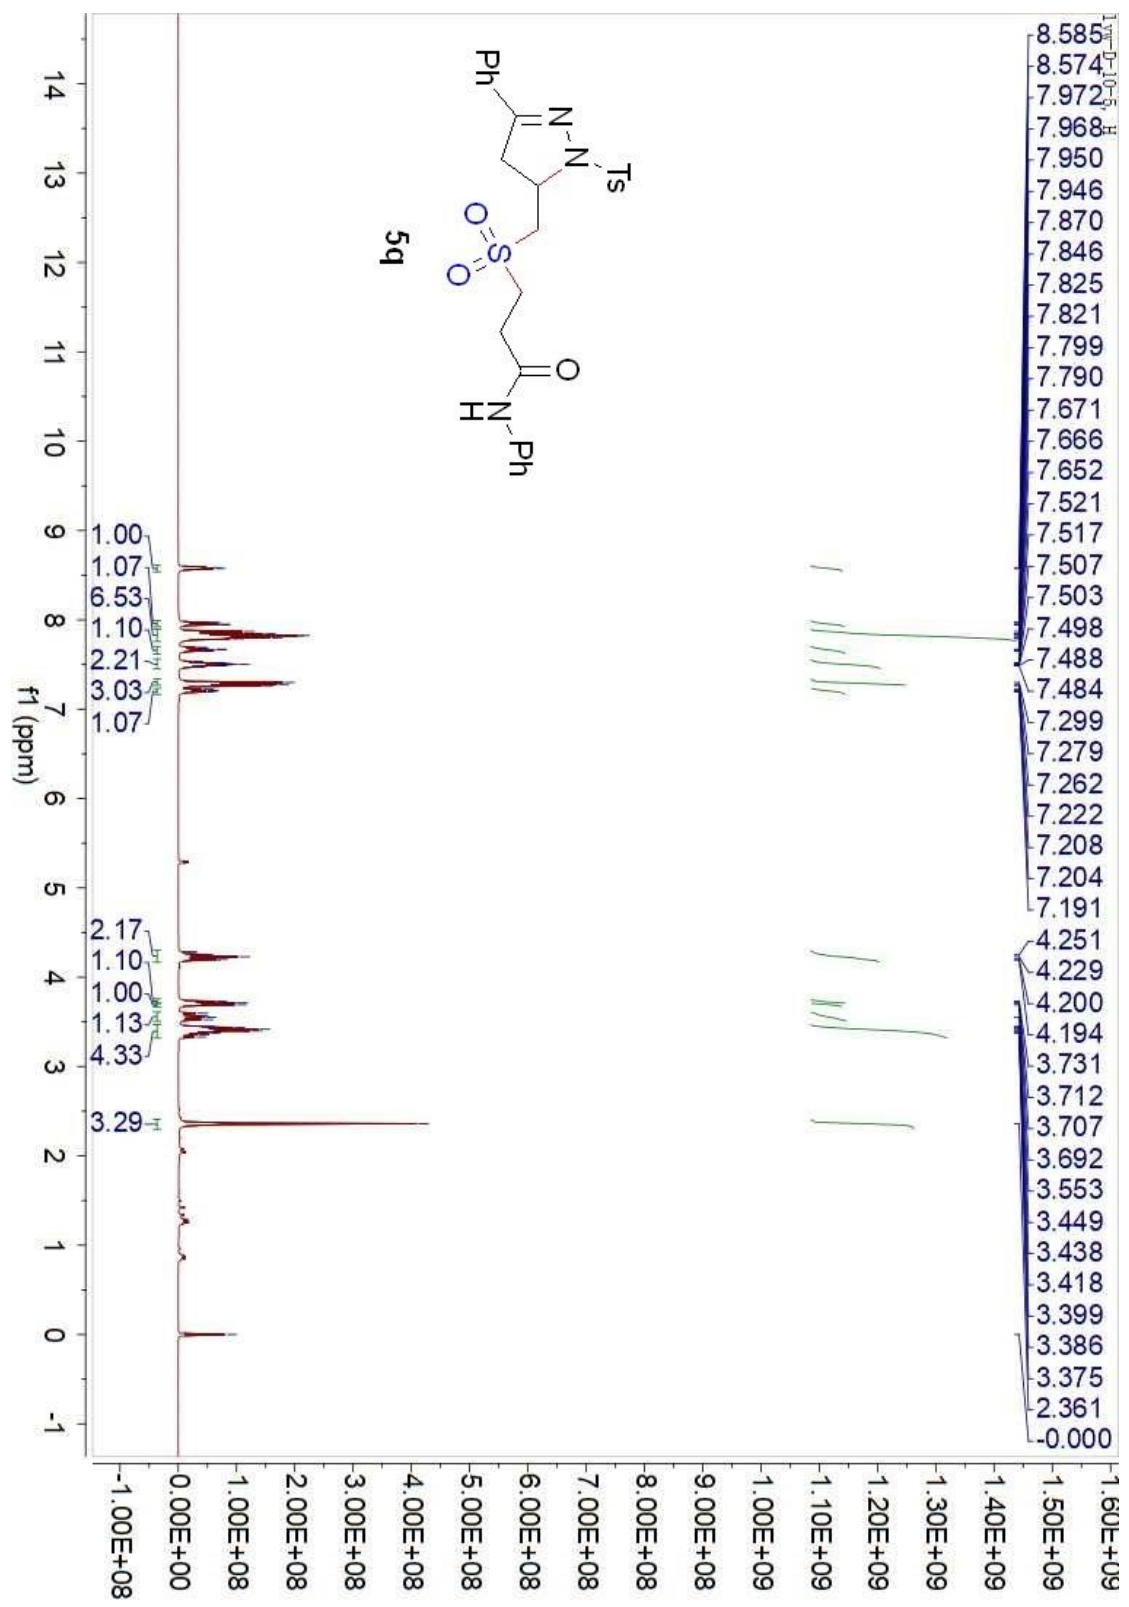

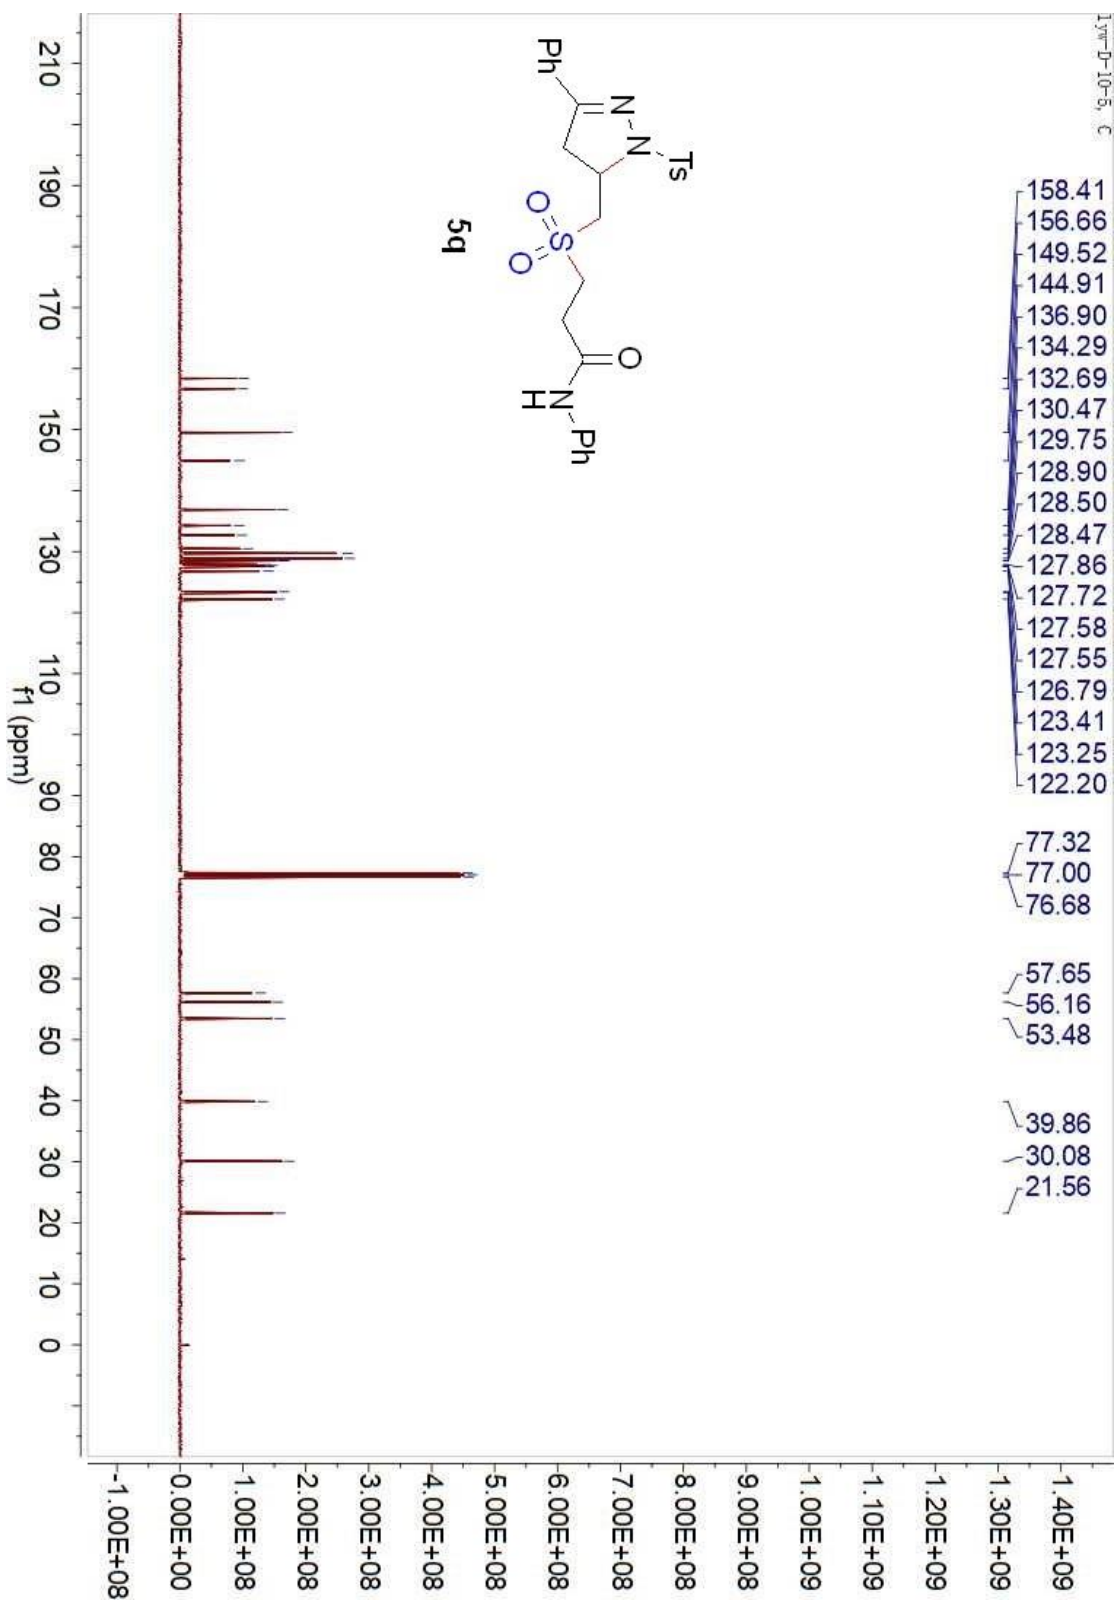

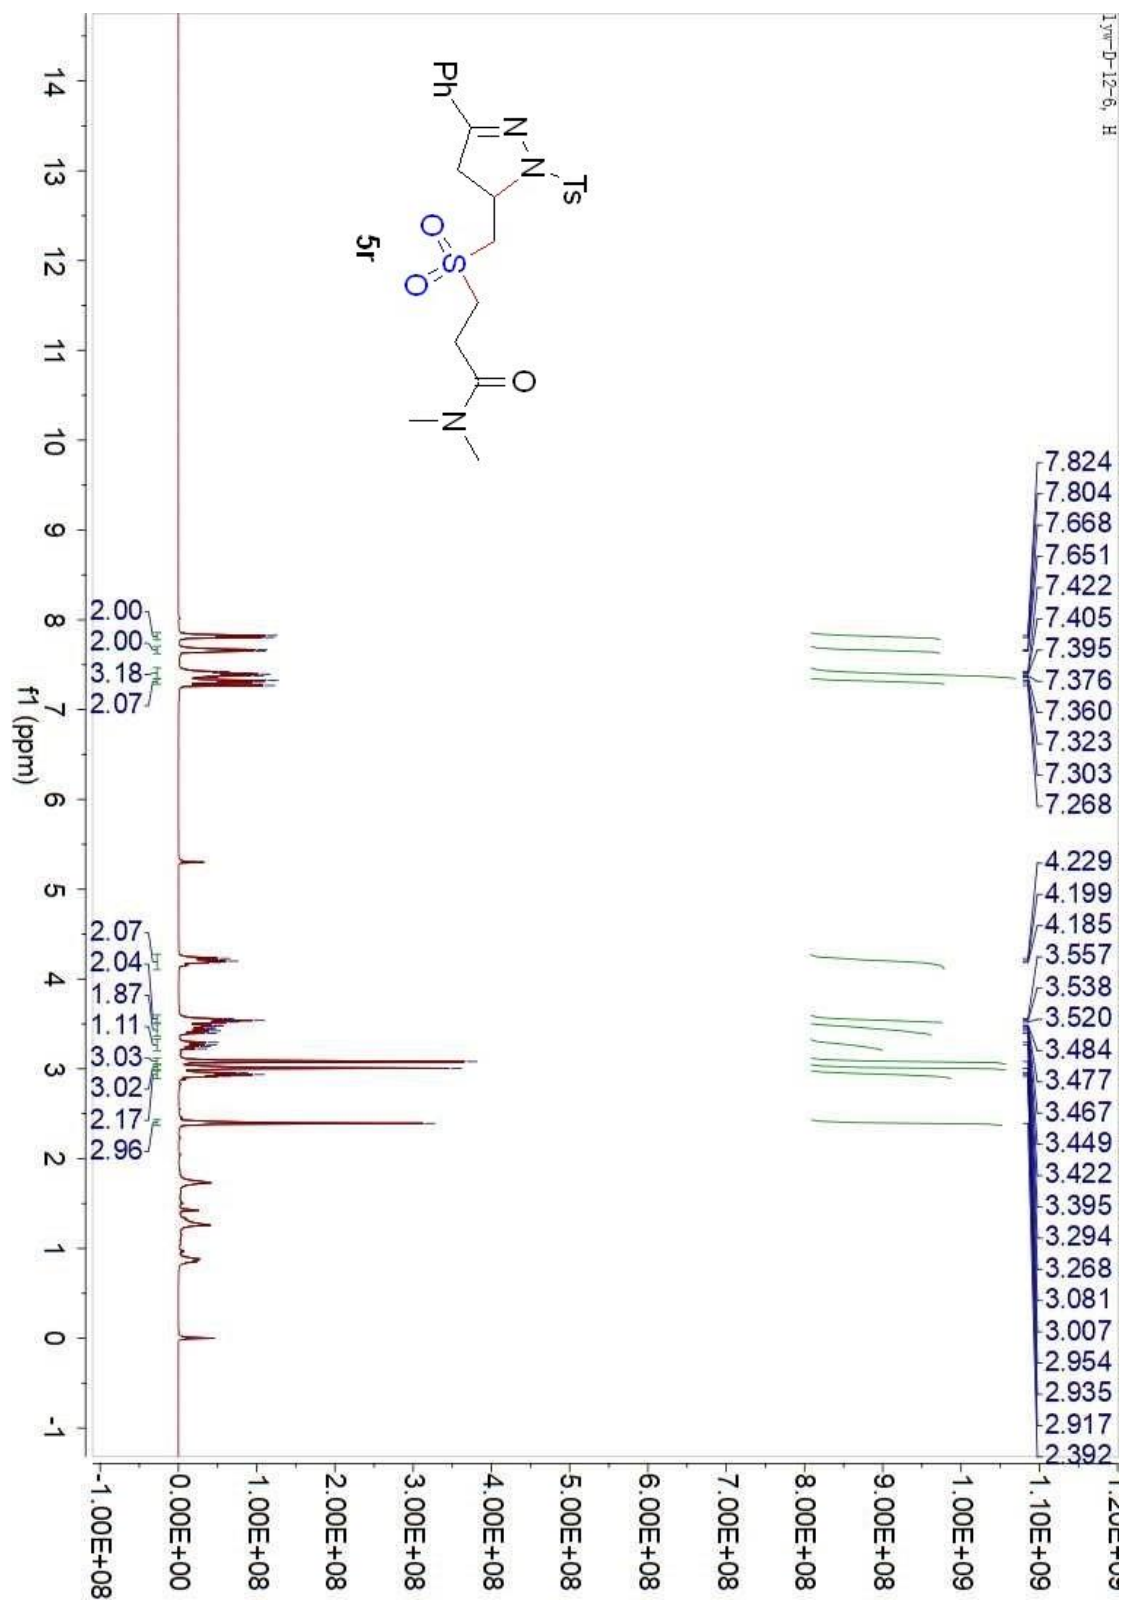

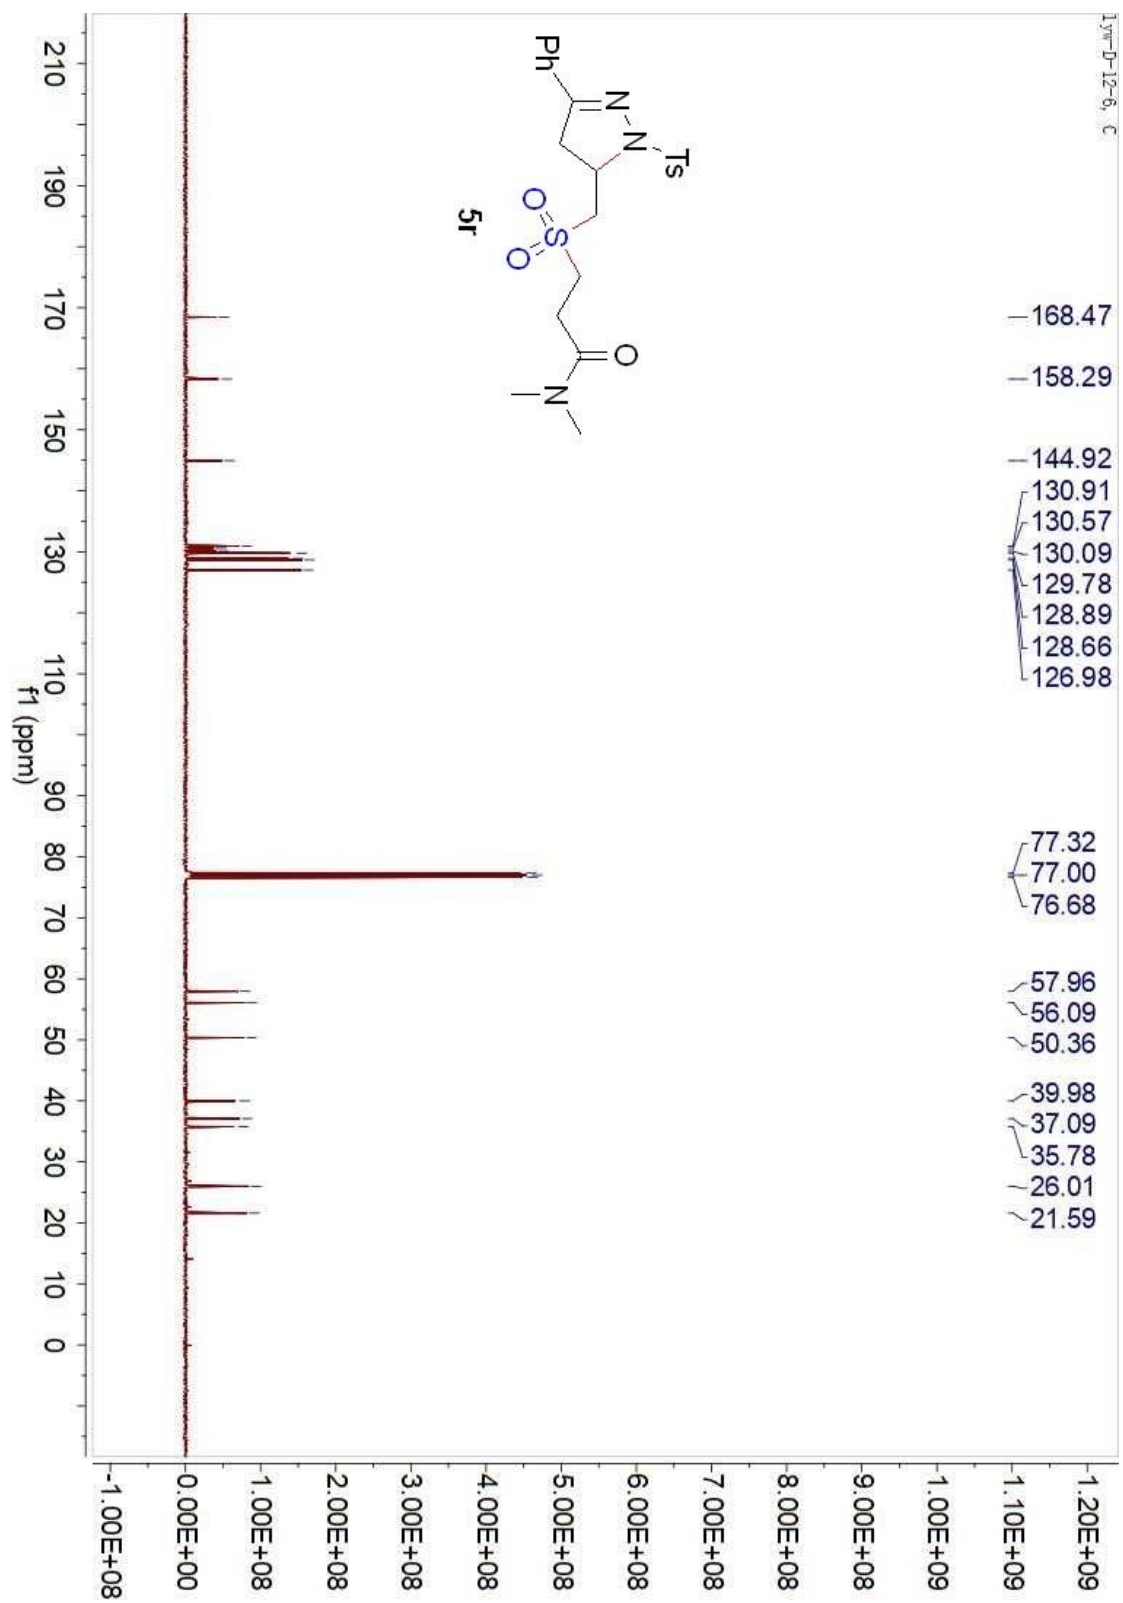

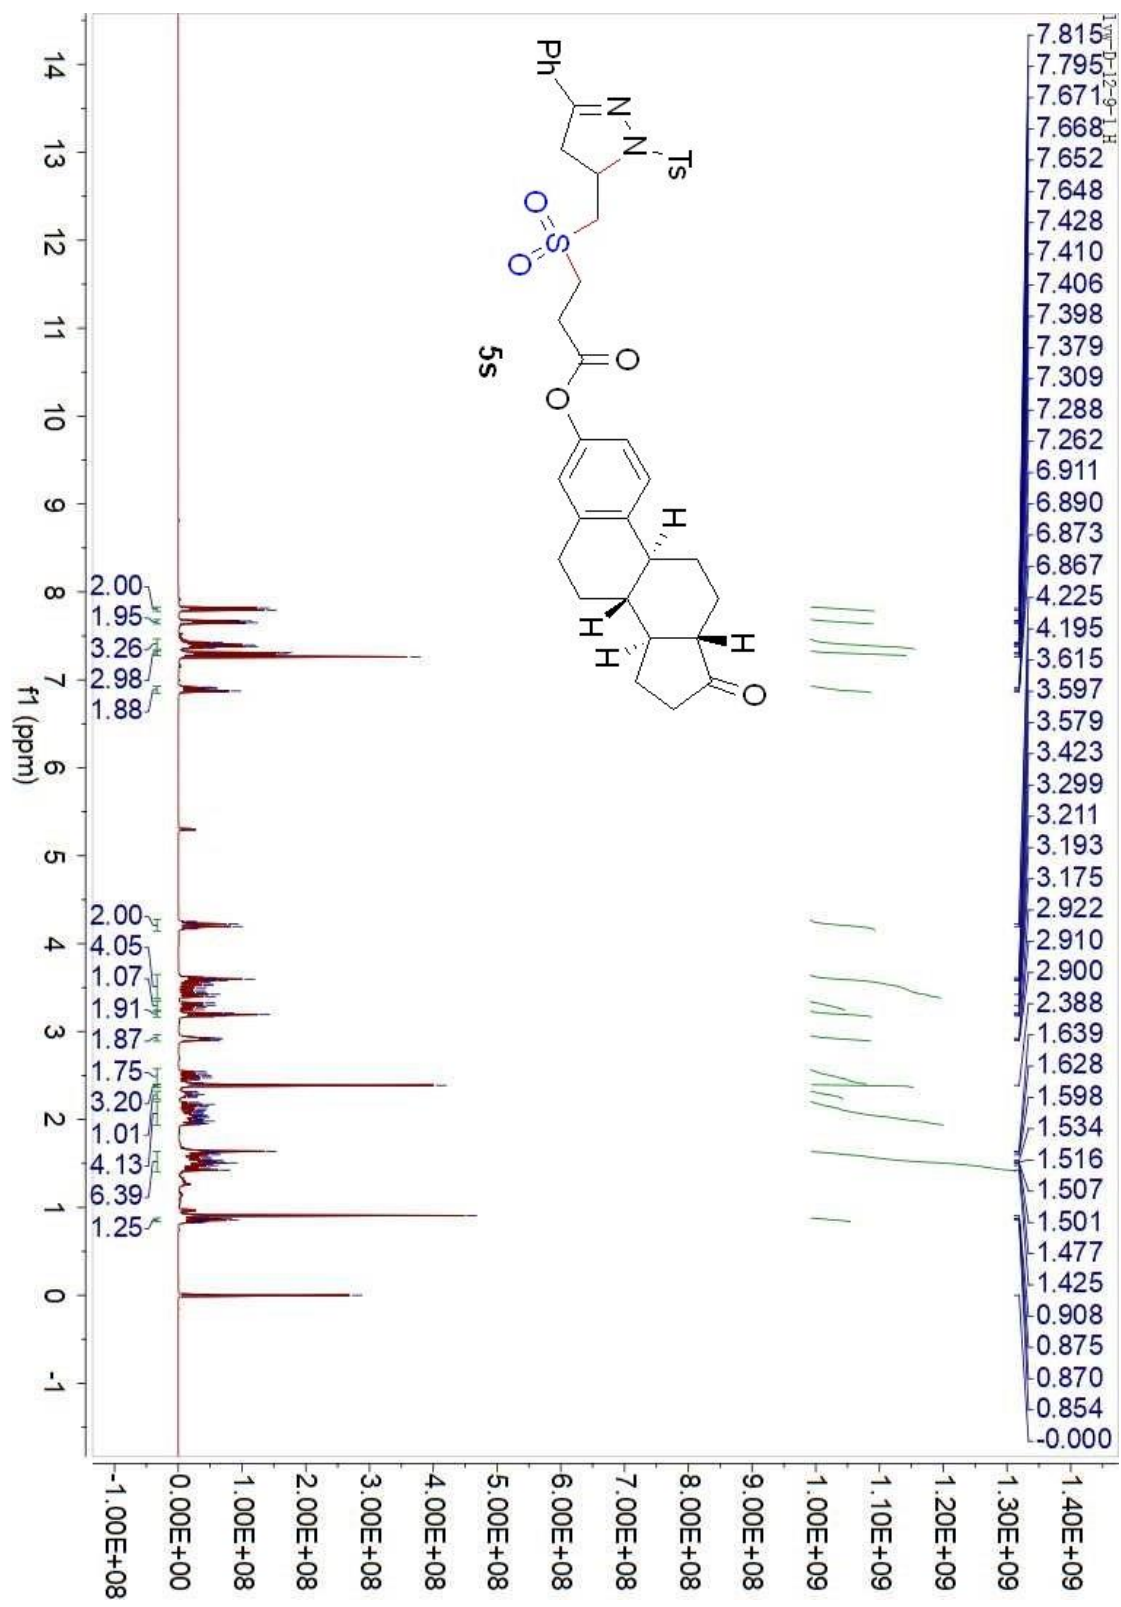

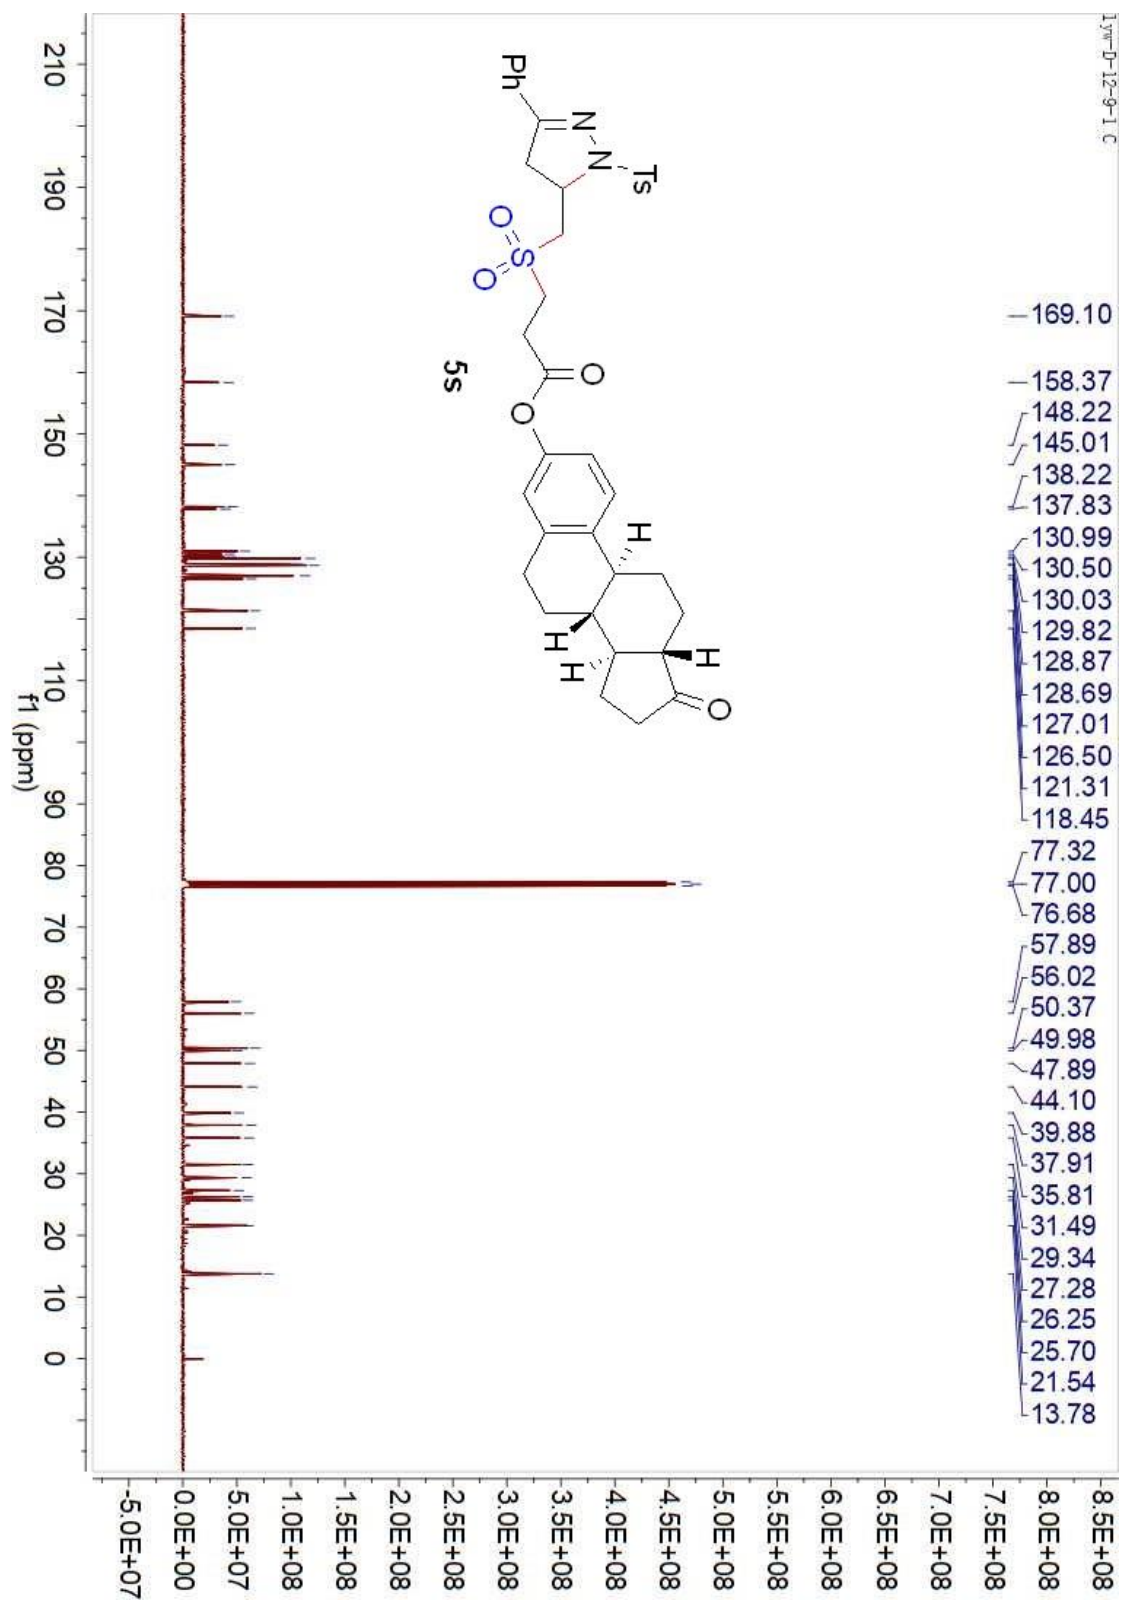

Supplement: d1qo00957e1.pdf [file d1qo00957e1.pdf]
